# Supplementary material for: Sleep quality and creativity in Chinese college student during the COVID-19 pandemic: The mediating role of executive function
Source: Front Public Health. 2022 Oct 13;10:987372. doi: 10.3389/fpubh.2022.987372 (PMC9609157; doi:10.3389/fpubh.2022.987372)
Supplement: Supplementary file 1 [file Table_1.XLS]

## Sheet: 本科生4258
code	sex	height	weight	age	residence	only child	education father	occupation father	education mother	occupation mother	income	A1	A2	A3	A4	A5	A6	A7	A8	A9	A10	B1	B2	B3	B4	B5	B6	B7	B8	B9	B10	B11	B12	B13	B14	B15	B16	B17	B18	B19	B20	B21	B22	B23	B24	B25	B26	B27	B28
10543	2	166	52	17	1	0	5	5	5	5	10	2	2	4	2	1	1	3	1	1	5	3	3	3	1	2	3	3	3	2	3	3	3	3	3	2	1	3	2	3	3	3	2	3	3	3	3	3	2
7075	1	178	83	17	0	0	5	4	5	5	10	2	1	2	1	1	1	1	1	1	1	2	2	2	2	2	2	2	2	2	2	2	2	2	2	2	2	2	2	2	2	2	2	2	2	2	2	2	2
10523	2	177	62	17	1	1	5	5	5	5	8	3	2	3	2	2	3	1	1	1	3	2	3	3	3	1	2	2	1	3	2	3	3	1	1	2	1	3	2	1	1	2	1	3	3	3	3	3	1
10107	1	184	78	17	1	1	6	5	6	5	5	3	2	2	2	1	1	1	1	1	5	3	2	3	2	1	1	2	2	2	2	2	2	3	1	3	1	3	1	2	1	3	3	1	3	3	2	2	1
10073	2	161	116	17	1	1	5	4	5	4	9	3	2	2	2	1	1	1	1	1	2	2	3	3	1	2	3	2	3	3	2	3	3	2	2	2	1	2	2	3	3	2	2	2	3	3	2	3	2
9723	2	173	58	17	1	1	5	4	5	4	9	2	1	1	2	1	1	1	1	1	1	1	1	3	2	1	2	1	2	2	2	2	3	1	3	1	1	3	2	1	2	3	1	1	2	2	2	3	1
10275	1	172	80	17	1	1	5	4	4	4	10	2	2	1	2	1	1	1	2	1	1	3	3	3	1	1	3	3	3	1	2	3	3	2	1	2	1	2	1	1	2	3	1	1	3	2	2	2	2
10071	2	168	53	17	1	0	5	5	5	4	8	2	2	5	2	3	2	2	3	1	2	2	2	2	1	3	3	3	3	1	3	3	3	3	3	3	1	2	3	2	2	2	2	2	2	2	2	2	2
7320	2	157	43	17	1	0	5	5	5	4	8	2	2	3	3	1	1	1	2	1	5	2	3	3	2	2	3	2	2	2	3	2	2	2	3	3	1	3	3	2	2	2	1	2	3	3	2	3	2
7974	1	175	180	17	1	1	4	3	5	5	10	3	4	1	3	1	1	1	1	1	4	3	3	3	1	3	3	3	3	1	3	3	1	3	3	3	3	2	3	3	3	3	3	3	3	3	3	3	3
7226	1	168	53	17	1	0	5	4	4	4	9	2	2	1	2	1	2	1	1	1	3	2	2	2	2	2	2	2	2	2	2	2	2	2	2	2	2	2	2	2	2	2	2	2	2	2	2	2	2
11025	2	173	58	17	1	0	5	4	5	5	7	3	2	4	3	2	1	1	1	1	5	3	3	3	2	2	3	3	3	2	3	3	3	2	3	3	1	3	2	3	3	2	1	2	3	2	3	3	2
7842	2	162	59	17	1	0	4	5	5	5	7	1	1	2	3	2	3	1	3	1	4	2	2	2	2	1	2	2	3	2	2	2	3	1	3	3	2	3	2	2	2	2	1	2	2	2	2	3	3
8800	2	167	52	17	0	0	5	3	5	3	9	3	4	1	2	2	1	1	1	1	3	2	2	2	1	2	2	2	3	2	2	2	3	1	1	2	1	3	2	2	2	2	1	3	3	2	2	2	1
7631	2	159	75	17	0	0	5	3	4	4	9	2	1	4	2	2	1	1	1	1	2	2	2	2	2	2	2	2	2	2	2	2	2	2	2	2	2	2	2	2	2	2	2	2	2	2	2	2	2
8549	2	170	50	17	1	1	5	4	5	4	7	3	2	1	2	1	1	1	1	1	3	3	3	3	2	1	2	3	3	2	3	3	2	2	2	2	1	2	2	2	3	2	3	2	3	3	3	3	3
9827	2	158	50	17	1	0	5	4	5	4	7	3	2	3	2	1	1	1	1	1	5	2	3	3	2	2	2	3	3	2	2	3	2	2	1	2	1	2	2	2	2	2	2	2	2	2	2	2	2
9506	1	163	75	17	1	1	4	4	5	4	8	3	2	3	3	2	1	1	1	1	3	2	3	3	1	2	3	2	3	2	3	3	2	2	3	2	1	1	2	2	3	3	2	2	3	3	2	2	2
8419	2	160	54	17	1	1	4	4	4	4	9	2	3	1	2	1	1	1	1	1	2	3	3	3	1	3	3	3	3	1	3	3	3	2	3	1	1	3	3	1	2	3	3	3	3	3	3	3	1
8628	2	163	68	17	1	1	4	5	5	4	7	2	1	3	2	2	2	2	2	1	1	2	2	3	2	1	3	3	3	3	3	3	1	3	1	3	1	3	2	1	2	2	1	2	3	3	3	3	2
9624	2	163	49	17	0	1	4	5	4	4	8	3	2	3	2	1	1	1	1	1	5	2	2	3	2	2	3	3	3	2	3	3	3	2	1	1	1	3	3	1	2	3	3	2	3	2	2	2	2
10584	2	152	80	17	1	1	5	3	5	4	7	2	2	2	2	2	1	1	2	1	3	1	1	2	2	2	2	3	3	2	3	3	2	1	2	2	1	2	2	1	2	3	1	3	3	2	3	3	3
6988	2	168	67	17	1	1	5	4	5	4	6	4	4	2	3	2	1	1	1	1	2	2	2	2	2	2	2	2	2	2	2	2	3	2	2	1	2	2	2	1	2	2	2	2	2	2	2	2	2
7317	2	160	42	17	1	0	5	4	5	4	6	4	3	3	3	3	3	3	3	1	3	2	2	2	2	1	2	2	2	3	2	2	2	2	2	2	2	2	2	1	2	2	2	2	2	2	2	2	2
7217	2	174	71	17	1	0	5	4	4	4	7	3	2	2	2	1	1	1	1	1	3	2	2	2	2	2	2	2	2	2	2	2	3	2	2	2	2	2	2	2	2	2	1	1	2	2	2	2	2
8715	2	182	57.5	17	1	1	6	4	5	4	4	3	2	3	2	2	2	2	2	1	1	2	2	3	1	2	3	2	2	2	2	3	2	2	2	2	1	3	2	2	2	3	2	3	3	2	3	3	2
10339	2	167	76	17	1	1	5	4	5	4	5	2	2	3	2	1	1	1	1	1	5	2	2	3	1	3	3	2	3	2	3	3	3	2	2	2	1	3	2	2	2	2	3	3	3	2	2	3	1
10125	2	173	60	17	1	0	5	4	4	4	6	1	2	3	3	1	1	1	1	1	5	1	3	3	1	2	1	3	3	2	3	3	3	1	1	1	1	3	3	2	2	2	2	3	3	2	2	2	1
10186	2	164	50	17	1	1	3	3	5	4	8	2	1	2	2	1	1	1	2	1	3	2	2	2	2	2	2	2	2	2	2	2	2	2	2	2	1	3	2	2	2	3	1	2	2	2	2	2	2
10514	2	167	65	17	1	0	4	5	5	4	5	2	1	1	2	1	1	1	1	1	1	3	3	3	1	3	3	3	3	3	3	3	3	2	2	2	2	2	2	3	2	2	3	3	3	3	3	3	2
9524	1	185	90	17	1	1	5	1	5	1	10	5	3	3	3	1	1	1	1	1	1	1	3	3	3	3	3	3	3	3	3	3	3	1	3	1	1	3	3	1	3	2	2	2	2	2	2	2	2
8071	1	181	84	17	0	0	4	2	4	2	10	2	2	2	2	1	1	1	1	1	5	2	3	2	2	1	2	2	2	2	2	2	3	1	3	3	1	3	2	3	2	2	2	1	2	2	2	2	1
8718	2	175	62	17	1	1	5	4	5	4	4	2	1	2	3	1	1	1	1	1	1	3	3	3	2	3	3	3	3	2	3	3	2	1	1	3	1	2	2	2	2	3	2	2	3	3	3	3	2
8983	1	181	70	17	1	1	4	3	4	3	8	3	4	3	2	2	2	3	1	1	1	2	2	2	2	1	2	2	2	2	2	2	3	1	1	2	1	3	2	2	2	2	2	1	2	3	2	2	1
6994	2	173	54	17	1	1	4	2	4	2	8	2	1	2	2	1	1	1	1	1	1	3	3	3	1	3	3	3	3	2	3	3	2	2	2	2	1	3	1	2	2	3	1	2	2	2	2	2	2
8267	2	162	50	17	0	1	4	2	4	2	8	3	3	2	3	3	3	3	3	1	1	3	3	3	1	3	3	3	3	1	3	3	1	3	3	3	3	2	3	3	3	3	3	3	3	3	3	3	3
10563	1	173	49	17	1	1	4	2	4	2	8	3	2	2	2	2	2	2	2	2	3	2	2	2	2	2	2	2	2	2	2	2	2	2	2	2	2	2	2	2	2	2	2	2	2	2	2	2	2
7115	1	173	60	17	0	0	4	2	4	2	8	4	1	3	3	1	1	1	1	1	1	1	2	2	2	2	2	2	2	2	2	2	2	2	2	2	2	2	2	2	2	2	2	2	2	2	2	2	2
7266	1	175	58	17	1	1	5	3	4	3	5	2	2	3	2	2	2	2	2	2	3	2	2	2	2	2	2	2	2	2	2	2	2	2	2	2	2	2	2	2	2	2	2	2	2	2	2	2	2
8605	2	167.5	48.5	17	0	1	4	2	4	3	7	3	4	1	2	5	4	1	4	4	3	1	3	3	3	1	3	3	1	1	3	2	1	1	3	2	2	2	3	3	3	3	3	2	2	2	1	3	1
7884	1	172	75	17	0	0	4	3	4	3	6	2	2	2	2	1	1	1	1	1	2	3	3	3	1	2	2	2	2	3	2	2	3	2	2	2	2	3	2	2	2	2	2	2	2	3	2	2	2
7690	2	176	95	17	0	1	3	3	3	3	8	2	1	1	2	1	2	1	2	1	1	3	3	3	2	3	2	3	3	2	3	3	3	1	2	2	1	3	2	2	2	2	2	2	2	2	2	2	2
10340	2	170	68	17	1	1	2	3	5	3	7	3	2	4	3	1	1	1	4	1	1	2	2	3	1	1	3	3	2	3	2	2	2	3	3	2	1	3	2	2	3	2	3	2	2	2	2	2	2
9026	2	168	60	17	0	1	4	2	4	2	7	3	2	1	2	1	2	3	1	1	4	3	3	3	1	2	3	3	3	1	3	3	3	3	3	3	1	2	3	3	3	3	2	3	3	3	3	3	3
8090	2	163	65	17	0	0	4	3	3	3	6	3	2	4	2	3	1	2	1	1	3	2	2	2	2	2	2	2	2	2	2	2	2	2	2	2	2	2	2	2	2	2	2	2	2	2	2	2	2
7329	1	170	53	17	0	0	4	3	3	3	6	4	2	3	2	1	1	1	1	1	1	2	2	3	2	2	2	2	2	2	3	2	3	1	1	2	1	3	1	2	2	2	2	2	2	3	2	2	2
8490	2	171	50	17	1	1	5	1	4	1	7	2	1	2	2	1	1	1	1	1	1	2	2	2	2	2	2	2	2	2	2	2	2	2	2	2	2	2	2	2	2	2	2	2	2	2	2	2	2
7929	2	167	46	17	1	1	4	1	4	1	8	3	2	1	3	3	2	2	2	1	2	2	3	2	1	2	2	2	2	2	3	3	3	3	2	3	1	3	2	3	3	3	2	1	3	3	2	3	2
7133	2	168	58	17	1	1	4	2	4	1	7	2	1	3	2	1	1	1	1	1	1	2	2	2	2	2	2	2	2	2	2	2	2	2	2	2	2	2	2	2	2	2	2	2	2	2	2	2	2
9801	1	177	60	17	1	1	4	2	4	2	6	3	3	3	3	3	3	3	3	3	1	2	2	2	2	2	2	2	2	2	2	2	2	2	2	2	2	2	2	2	2	2	2	2	2	2	2	2	2
10708	1	180	140	17	1	1	4	2	3	2	7	2	2	1	2	2	2	2	2	1	3	2	2	2	2	2	2	2	2	2	2	2	2	2	2	2	2	2	2	2	2	2	2	2	2	2	2	2	2
7156	2	172	65	17	0	1	3	2	3	1	9	2	3	3	3	2	2	3	2	1	3	2	2	2	1	2	3	3	3	2	2	2	1	3	3	3	1	2	2	3	3	1	1	2	2	3	1	3	3
10246	2	169	56	17	0	0	4	3	3	2	6	4	3	4	2	4	2	2	2	1	4	2	2	2	2	2	2	2	2	2	2	2	2	2	2	2	2	2	2	2	2	2	2	2	2	2	2	2	2
7766	2	168	51	17	0	0	4	3	3	3	5	2	1	1	2	1	1	1	1	1	1	2	2	2	2	2	2	2	2	2	2	2	2	2	2	2	2	2	2	2	2	2	2	2	2	2	2	2	2
7272	2	173	64	17	1	1	5	3	3	1	5	2	2	2	2	2	1	1	1	1	5	3	3	3	1	1	2	2	3	2	3	3	3	2	1	1	1	2	3	2	3	3	2	2	3	3	3	3	3
9710	1	183	60	17	1	1	4	2	4	2	5	2	1	1	2	1	1	1	1	1	1	2	2	2	2	2	2	2	2	2	2	2	2	2	2	2	2	2	2	2	2	2	2	2	2	2	2	2	2
9171	2	165	65	17	1	0	3	2	4	2	6	2	2	2	2	1	1	1	1	1	3	3	3	3	1	3	3	3	3	1	3	3	3	3	3	3	3	1	3	3	3	3	3	3	3	3	3	3	3
6959	2	165	53	17	1	0	3	2	3	2	7	2	1	2	2	1	1	1	1	1	2	3	3	3	1	3	3	3	3	2	3	3	3	2	1	1	1	3	2	3	2	3	3	1	3	3	3	3	3
9606	1	158	66	17	0	0	3	3	3	3	5	2	2	3	2	1	1	2	2	1	3	2	2	3	2	1	2	2	2	2	2	2	2	2	1	2	1	3	2	2	2	2	1	1	2	2	2	2	2
9263	1	178	60	17	1	1	4	2	4	1	5	2	1	1	3	1	1	1	1	1	1	3	3	3	2	1	3	3	3	2	3	3	3	3	1	3	1	3	3	1	3	3	1	1	3	2	3	3	1
10433	2	156.5	50	17	1	0	4	1	4	3	4	2	2	2	3	1	4	3	1	1	5	2	2	2	2	2	2	2	2	2	2	2	2	2	2	2	2	2	2	2	2	2	2	2	2	2	2	2	2
8451	2	171	65	17	1	1	4	1	2	2	7	1	1	1	1	1	1	1	1	1	1	1	1	1	3	1	1	1	1	3	1	1	3	1	1	1	1	3	1	1	1	1	1	1	1	1	1	1	1
8867	2	160	53	17	1	1	3	1	3	1	8	3	3	3	3	2	1	1	1	1	5	2	3	3	1	1	1	2	2	3	3	3	3	3	1	3	1	3	2	3	3	3	1	3	3	3	2	3	3
8535	2	170	60	17	1	1	3	2	4	2	5	2	2	3	3	1	1	1	1	1	1	2	3	3	1	2	3	3	3	2	3	3	3	2	2	3	1	3	3	3	2	3	2	3	3	3	3	3	3
12088	2	165	55	17	1	0	2	2	4	2	6	3	2	3	3	2	2	4	1	1	3	2	2	2	2	2	3	3	3	3	2	2	3	2	2	2	1	3	2	1	2	3	1	2	3	2	2	2	2
9937	2	163	53	17	0	1	3	1	5	1	5	3	1	4	3	1	1	1	2	1	5	3	3	3	2	2	3	3	3	2	3	3	2	1	1	2	1	3	3	2	2	3	3	2	3	2	3	3	2
8875	2	167	75	17	1	0	4	2	4	1	4	1	4	2	2	4	1	3	3	3	1	2	2	2	2	2	2	2	2	2	2	2	2	2	2	2	2	2	2	2	2	2	2	2	2	2	2	2	2
2564	1	170	120	17	0	1	4	2	4	2	3	1	3	2	2	1	1	1	1	1	2	1	1	1	3	1	1	1	1	3	1	1	3	1	1	1	1	3	1	1	1	1	1	1	1	1	1	1	1
7196	2	173	51	17	0	1	3	2	3	1	6	2	2	3	2	1	1	1	1	1	5	2	2	2	2	2	2	2	2	2	2	2	2	2	2	2	1	2	2	2	2	2	2	2	2	2	2	2	1
10019	1	175	85	17	1	0	2	3	4	2	4	2	2	2	2	1	1	1	1	1	2	3	3	3	1	3	3	3	3	1	3	3	1	3	3	3	3	3	3	2	3	3	2	3	3	3	3	3	3
9406	2	160	50	17	0	0	2	2	2	2	7	2	4	2	2	1	1	1	1	1	3	3	3	3	1	3	3	3	3	1	3	3	3	1	3	3	1	3	3	3	3	3	3	3	3	3	3	3	3
9711	1	176.6	63	17	0	1	3	1	3	1	6	2	1	1	2	1	1	1	1	1	1	2	2	2	2	2	2	2	2	2	2	2	2	2	2	2	1	2	2	2	2	2	2	2	2	2	2	2	2
7011	2	166.5	85	17	0	0	3	1	3	1	6	2	1	2	2	1	1	1	1	1	5	2	2	2	3	3	3	3	2	3	3	3	1	1	1	1	1	3	3	1	1	3	1	2	3	3	2	2	1
8381	2	168	88	17	0	1	3	2	3	1	5	3	3	2	2	2	2	2	1	1	3	3	2	3	1	1	2	2	2	1	3	3	3	3	1	2	1	2	3	2	3	2	2	1	2	2	2	2	3
7887	2	163	50	17	0	0	3	2	3	1	5	2	2	3	2	1	2	1	1	1	3	2	2	2	2	2	2	2	2	2	2	2	2	2	2	2	2	2	2	2	2	2	2	2	2	2	2	2	2
9117	1	175	70	17	0	0	3	1	2	2	6	2	1	1	2	1	1	4	1	1	1	3	3	3	1	1	3	2	3	2	3	3	3	3	3	2	1	3	1	2	2	3	3	2	3	2	3	2	1
6907	1	180	90	17	0	0	2	2	2	2	6	2	2	3	3	2	2	2	2	2	5	2	2	2	2	2	2	2	2	2	2	2	2	2	2	2	2	2	2	2	2	2	2	2	2	2	2	2	2
8514	1	176	115	17	0	1	5	1	2	1	4	2	1	1	2	1	1	1	1	1	1	2	2	2	2	2	2	2	2	2	2	2	3	2	2	2	1	3	1	1	2	3	1	1	3	3	3	3	2
8432	1	170	68	17	0	1	3	1	3	1	5	1	2	3	2	3	2	2	2	2	1	2	2	2	2	2	2	2	2	2	2	2	2	2	2	2	2	2	2	2	2	2	2	2	2	2	2	2	2
7205	2	168	50	17	0	0	3	1	3	1	5	2	1	1	2	1	1	1	2	1	1	2	2	2	2	3	2	3	3	2	3	3	3	1	1	2	1	3	2	1	2	3	2	2	2	3	3	3	1
8468	1	178	80	17	1	1	4	3	3	1	2	4	2	3	3	2	1	2	1	1	1	3	3	3	1	2	3	3	2	2	3	3	3	2	3	3	1	2	2	2	2	2	2	3	3	3	3	3	2
9118	2	158	56	17	1	0	3	2	3	1	4	2	2	2	2	1	1	1	1	1	5	2	3	3	2	3	3	2	3	2	2	2	3	2	2	2	1	2	2	2	2	2	2	2	2	2	2	2	2
9574	1	173	53	17	0	1	4	3	2	1	3	2	2	3	2	3	3	3	3	3	2	2	2	2	2	2	2	2	2	2	2	2	2	2	2	2	2	2	2	2	2	2	2	2	2	2	2	2	2
5011	2	168	60	17	1	1	2	1	2	3	5	5	2	5	2	4	2	4	2	4	4	2	1	2	2	1	1	2	2	3	2	1	2	1	2	2	2	2	2	2	2	2	2	2	2	2	2	2	3
8210	1	173	59	17	0	0	2	2	1	2	6	4	2	3	2	1	1	2	1	1	1	3	3	3	2	3	3	3	3	2	3	3	3	2	1	3	1	3	3	3	3	3	2	3	3	3	3	3	2
7952	2	171	70	17	1	1	4	1	3	1	3	2	1	1	2	1	1	1	1	1	2	3	3	3	1	3	3	3	3	1	3	3	3	3	3	3	1	3	3	3	3	3	1	3	3	3	3	3	3
8055	2	170	55	17	1	0	3	1	4	1	3	3	1	4	2	1	1	1	1	1	2	3	3	3	1	2	3	3	3	1	3	3	3	3	1	3	1	2	3	3	3	3	1	2	3	3	3	3	2
7085	2	158	45	17	1	0	3	1	3	1	4	2	2	2	2	3	3	3	3	3	2	2	2	2	2	2	2	2	2	2	2	2	2	2	2	2	2	2	2	2	2	2	2	2	2	2	2	2	2
10103	1	180	117	17	0	0	3	1	2	1	5	3	2	3	2	1	1	3	1	1	1	3	3	3	2	3	2	2	3	3	3	3	3	2	1	2	1	2	1	3	3	3	1	2	3	2	3	3	2
10104	1	180	117	17	0	0	3	1	2	1	5	3	2	3	2	1	1	3	1	1	1	3	3	3	2	3	2	2	3	3	3	3	3	2	1	2	1	2	1	3	3	3	1	2	3	2	3	3	2
9856	2	183	100	17	0	0	3	1	2	1	5	4	4	5	2	5	1	1	5	1	2	2	2	2	2	2	2	2	2	2	2	2	1	3	2	2	2	2	2	2	2	2	2	2	2	2	2	2	2
9042	1	172	98	17	0	1	2	2	2	1	5	3	3	3	2	2	1	1	1	1	3	1	2	3	2	2	2	3	3	3	3	3	3	1	2	2	1	3	2	2	2	3	2	2	2	2	2	3	2
7499	2	165	60	17	0	0	2	1	2	1	4	3	2	3	3	2	2	4	1	1	3	2	2	2	2	2	2	2	2	2	2	2	2	2	2	2	1	2	2	2	2	2	2	2	2	2	2	2	2
10777	2	155	43	17	0	0	2	1	2	1	4	3	3	2	2	2	2	2	2	1	3	2	3	2	3	2	2	3	3	2	3	3	2	1	1	2	1	3	2	2	2	2	1	2	2	3	3	3	2
9694	2	158.9	54	17	0	1	2	1	2	1	3	2	1	2	2	2	2	2	2	2	3	2	2	2	2	2	2	2	2	2	2	2	2	2	2	2	2	1	3	1	2	2	2	2	2	2	2	2	1
8782	1	168	50	17	0	0	2	1	1	1	3	1	1	1	2	1	1	1	1	1	1	1	1	1	3	1	1	1	1	3	1	1	3	1	1	1	1	3	1	1	1	1	1	1	1	1	1	1	1
8812	1	171	78.2	18	1	1	6	5	6	5	10	2	4	1	2	1	3	2	1	1	3	3	3	3	1	3	3	3	3	1	3	2	2	3	1	1	1	2	3	3	3	3	2	3	1	3	3	3	1
8819	1	185	70	18	1	1	6	5	6	5	10	3	4	1	3	1	1	4	1	1	3	1	3	3	1	3	3	3	3	3	3	3	2	2	1	3	3	3	1	3	1	2	1	1	1	3	3	3	3
9253	1	183	70	18	1	1	6	5	6	5	10	2	2	1	2	1	1	1	1	1	3	3	3	3	1	3	3	3	3	1	3	3	1	3	3	3	3	1	3	3	3	3	3	3	3	3	3	3	3
7516	1	177	61	18	1	1	6	5	6	5	10	1	1	4	1	1	1	1	1	1	1	3	3	3	1	3	3	3	3	1	3	3	1	3	3	3	3	1	3	3	3	3	3	3	3	3	3	3	3
10925	2	160	57	18	1	1	6	5	6	5	10	2	2	2	2	2	1	1	1	1	1	2	2	2	2	2	2	2	2	2	2	3	2	2	2	2	1	3	3	2	2	2	2	2	2	2	2	2	2
8736	1	185	50	18	1	1	6	5	6	5	10	2	1	1	2	1	1	1	1	1	1	3	3	3	1	3	3	3	3	1	3	3	1	3	3	3	3	1	3	3	3	3	3	3	3	3	3	3	3
9799	1	178	75	18	1	0	6	5	6	5	10	1	1	1	1	1	1	1	1	1	1	1	1	1	3	1	1	1	1	3	1	1	3	1	1	1	1	3	1	1	1	1	1	1	1	1	1	1	1
10463	1	182	70	18	0	0	6	5	6	5	10	2	1	1	2	1	1	1	1	1	3	2	2	2	2	2	2	2	2	2	2	2	2	2	2	2	2	2	2	2	2	2	2	2	2	2	2	2	2
12172	1	158	58	18	1	0	6	4	6	5	10	1	1	1	1	3	3	3	3	3	1	2	2	2	2	2	2	2	2	2	2	2	2	2	2	2	2	2	2	2	2	2	2	2	2	2	2	2	2
8962	2	154	42	18	1	1	6	5	6	4	10	5	3	4	3	2	3	1	2	1	5	2	2	2	2	2	2	2	2	2	2	2	3	2	2	2	1	2	2	2	2	2	2	2	2	2	2	2	3
7818	1	185	70	18	0	0	6	5	6	4	10	5	5	5	1	1	1	1	1	1	5	1	3	2	3	1	3	3	3	3	2	3	2	2	1	1	1	2	2	1	2	2	1	2	2	2	3	2	3
1120	2	170	50	18	1	0	6	5	6	4	10	2	3	3	1	4	3	4	3	4	2	2	3	3	2	2	2	1	2	2	2	2	2	2	2	1	2	2	3	2	3	2	2	2	2	2	1	2	2
8200	2	173	80	18	1	1	6	5	5	5	10	3	2	3	2	1	1	1	1	1	5	3	3	3	1	2	3	3	3	2	3	3	3	1	1	2	1	3	1	2	3	3	3	1	3	1	3	3	2
9219	1	180	70	18	1	1	5	5	6	5	10	2	1	1	2	1	1	1	1	1	1	3	3	3	1	3	3	3	3	1	3	3	2	3	3	2	2	3	3	3	3	3	3	3	3	3	3	3	1
7843	2	178	58	18	1	1	5	5	6	5	10	3	3	3	3	1	1	1	1	1	3	2	2	2	2	2	2	2	2	2	2	2	2	2	2	2	2	2	2	2	2	2	2	2	2	2	2	2	2
9301	2	159.5	57	18	1	1	6	4	6	4	10	3	1	1	2	1	1	1	1	1	3	3	3	3	2	3	3	2	3	2	3	3	2	2	3	2	1	2	3	3	3	3	2	2	3	2	2	3	3
9939	2	163	55	18	1	1	6	4	6	4	10	2	2	3	2	2	1	2	1	1	3	3	3	3	2	3	3	3	3	3	3	3	3	3	2	1	1	3	2	3	2	3	2	3	2	3	3	3	3
11784	2	172	47	18	1	1	6	4	6	4	10	4	4	3	3	1	1	1	1	1	5	2	2	2	2	2	2	2	2	2	2	2	2	2	2	2	2	2	2	2	2	2	2	2	2	2	2	2	2
10218	2	161	50	18	1	1	6	4	5	5	10	3	2	3	3	3	4	4	3	1	2	2	2	2	1	1	2	2	2	2	2	2	2	2	2	2	2	2	2	2	2	2	2	2	2	2	2	2	2
8484	2	161	62	18	1	1	6	5	5	4	10	3	2	3	3	2	3	3	1	1	3	2	2	2	2	2	2	2	2	2	2	2	2	2	2	2	2	2	2	2	2	2	2	2	2	2	2	2	2
7736	1	170	55	18	1	1	6	5	5	5	9	3	2	3	3	1	1	1	1	1	2	2	2	3	3	1	1	2	2	2	2	2	3	1	2	1	1	3	2	2	2	2	1	2	2	2	2	2	2
8893	1	178	70	18	1	1	5	5	6	4	10	2	3	2	3	5	3	4	4	4	1	1	1	1	3	1	1	1	1	3	1	1	3	1	1	1	1	3	1	1	1	1	1	1	1	1	1	1	1
8510	1	187	75	18	1	1	5	5	5	5	10	2	2	2	2	1	1	1	1	1	5	1	2	2	1	3	3	3	3	1	3	3	1	2	3	2	1	1	3	3	3	3	1	2	3	3	3	3	1
10532	1	180	71	18	1	1	5	5	5	5	10	1	1	1	1	1	1	1	1	1	1	2	2	2	2	2	2	2	2	2	2	2	2	2	2	2	2	2	2	2	2	2	2	2	2	2	2	2	2
8997	1	180	70	18	1	1	5	5	5	5	10	2	1	1	2	1	1	1	1	1	1	3	3	3	1	3	3	3	3	3	3	3	3	3	3	3	1	3	3	3	3	3	3	3	3	3	3	3	3
7616	1	175	70	18	1	1	5	5	5	5	10	3	2	3	3	3	3	3	2	1	3	2	1	3	1	2	2	3	1	2	2	3	1	2	1	2	2	2	2	3	2	3	3	1	3	3	3	3	3
6854	2	171	50	18	1	1	5	5	5	5	10	3	3	4	3	2	3	1	1	1	5	3	3	3	1	3	3	3	3	2	3	3	3	2	2	2	2	3	3	2	2	2	2	2	2	3	3	3	3
6955	1	190	75	18	1	1	6	4	6	4	9	2	1	1	2	1	1	1	1	1	1	2	2	2	2	2	2	2	2	2	2	2	2	2	2	2	2	2	2	2	2	2	2	2	2	2	2	2	2
8237	2	165	64	18	1	1	6	4	6	4	9	3	1	1	2	1	1	1	1	1	1	3	3	3	2	3	3	3	3	2	3	3	3	2	2	2	1	2	2	2	2	3	2	3	3	2	2	3	3
6847	1	187	90	18	1	0	6	4	6	4	9	2	1	1	2	1	1	1	1	1	1	1	3	3	1	1	1	3	3	1	3	3	3	1	3	1	3	3	3	3	3	3	3	3	3	3	3	3	3
8851	1	187	80	18	1	1	6	4	5	4	10	1	1	1	2	1	1	1	1	1	1	1	1	1	3	1	1	1	1	1	3	3	3	1	1	1	1	3	1	1	1	1	1	1	3	1	1	1	1
9913	1	172	67.5	18	1	0	6	4	5	4	10	3	2	3	2	4	1	1	2	1	1	2	3	2	1	1	3	3	3	2	3	2	2	1	1	2	1	2	1	2	2	2	1	1	2	3	2	2	1
8103	1	180	52	18	1	0	5	4	6	4	10	3	3	3	3	3	3	3	3	3	3	2	2	2	2	2	2	2	2	2	2	2	2	2	2	2	2	2	2	2	2	2	2	2	2	2	2	2	2
8881	2	161	72	18	1	1	6	5	5	4	9	3	2	2	3	1	1	1	1	1	1	1	2	2	2	1	3	2	3	2	3	2	2	2	3	2	1	3	2	2	2	2	1	2	2	3	2	2	3
10748	2	160	55	18	1	1	6	5	5	4	9	3	2	4	2	1	2	4	2	1	3	2	2	1	2	1	3	2	2	2	1	1	2	1	2	1	1	3	3	3	3	3	2	3	2	2	2	1	3
5959	1	180	100	18	1	1	6	5	6	5	7	3	3	3	3	3	3	3	3	3	3	2	2	2	2	2	2	2	2	2	2	2	2	2	2	2	2	2	2	2	2	2	2	2	2	2	2	2	2
9738	1	177	135	18	0	1	5	5	5	4	10	3	3	4	2	3	3	3	3	3	3	2	2	2	2	2	2	2	2	2	2	2	2	2	2	2	2	2	2	2	2	2	2	2	2	2	2	2	2
10757	1	185	88	18	1	1	5	5	5	4	10	3	3	2	2	3	1	3	1	1	2	2	2	2	2	2	2	2	2	2	2	2	2	2	2	2	2	2	2	2	2	2	2	2	2	2	2	2	2
6874	1	180	85	18	1	1	5	5	5	4	10	3	2	2	2	1	1	1	1	1	1	1	2	2	3	1	1	1	1	1	3	3	3	3	2	3	1	3	3	1	3	3	3	2	3	3	3	3	3
7276	1	175	62	18	1	1	5	5	5	4	10	2	2	1	3	1	1	1	1	1	5	3	3	3	1	3	3	3	3	1	3	3	3	3	3	3	3	3	3	3	2	3	1	3	3	3	3	3	1
8816	2	171	55	18	1	1	5	5	5	4	10	3	2	4	2	3	1	1	1	3	5	3	3	3	2	3	3	3	2	2	2	2	1	2	3	3	1	3	3	1	1	2	2	2	2	3	3	3	3
7620	2	165	55	18	1	1	5	5	5	4	10	3	2	3	2	3	4	3	1	1	2	3	3	3	1	3	3	3	3	1	3	3	1	3	3	3	3	1	3	3	3	3	3	3	3	3	3	3	3
7009	2	168	54	18	1	1	5	5	5	4	10	2	2	2	3	2	4	2	3	1	3	2	2	3	2	2	3	3	3	2	3	3	1	1	3	2	2	1	3	3	2	2	1	3	2	3	1	3	3
7417	2	157	53	18	1	1	5	5	5	4	10	3	3	3	2	1	1	1	1	1	3	3	3	3	2	3	3	3	3	2	3	3	3	3	3	3	1	3	3	2	3	3	3	3	3	3	3	3	3
8546	2	166	49	18	1	1	5	5	5	4	10	2	1	1	3	1	1	1	1	1	1	3	3	3	2	1	2	2	2	3	2	3	2	2	2	1	2	3	3	2	2	3	2	3	3	2	3	3	2
9544	1	173	70	18	1	0	5	5	5	4	10	2	4	1	2	1	1	1	1	1	1	2	2	2	2	2	2	2	2	2	2	2	2	2	2	2	2	2	2	2	2	2	2	2	2	2	2	2	2
10075	1	190	70	18	0	0	3	5	6	5	10	2	3	4	4	5	4	2	4	3	5	3	2	3	2	2	3	2	3	2	3	1	2	3	2	1	3	2	1	3	2	1	2	2	2	2	2	2	2
8061	2	168	80.2	18	1	0	6	4	6	4	8	3	2	2	2	1	1	1	1	1	5	1	3	2	3	1	1	1	1	1	3	1	3	1	1	2	1	3	2	1	1	2	1	1	1	3	1	1	1
7118	2	176	65	18	1	0	6	4	6	4	8	2	2	1	2	1	1	1	1	1	5	2	2	2	3	2	2	3	3	3	2	2	3	2	1	2	1	3	2	2	2	2	2	2	2	3	2	3	2
7747	2	161	57	18	1	0	6	4	6	4	8	3	2	3	2	3	1	2	1	3	4	2	2	3	2	1	2	2	3	2	2	2	2	2	2	3	2	2	2	2	2	2	2	2	2	3	3	3	2
7093	1	181	100	18	1	1	5	3	6	4	10	2	1	2	3	1	1	1	1	1	4	3	3	3	1	3	3	3	3	1	3	3	3	1	3	3	1	3	3	3	3	3	3	3	3	3	3	3	2
7250	1	175	51	18	1	1	6	5	6	4	7	2	1	1	3	1	1	1	1	1	1	1	1	1	3	1	1	3	3	3	1	1	3	1	1	1	1	1	1	1	1	1	1	1	1	1	1	1	1
9838	2	167	58	18	1	0	6	4	5	5	8	2	2	3	3	1	1	1	1	1	3	3	3	3	2	2	3	3	2	2	2	2	3	2	2	2	1	2	2	2	2	2	2	2	2	2	2	2	2
9435	1	175	120	18	1	1	5	4	6	4	9	3	3	2	2	3	4	2	2	1	4	3	3	2	2	2	2	2	2	2	3	3	3	2	2	2	1	2	2	2	2	2	2	2	2	3	3	3	1
7186	1	178	81	18	1	1	5	4	5	4	10	2	1	1	2	1	1	1	1	1	1	2	3	3	2	2	3	3	3	2	3	3	3	2	1	2	1	2	3	2	2	3	2	3	3	3	3	3	2
7978	1	170	70	18	1	1	5	4	5	4	10	3	2	2	2	1	1	1	1	1	5	3	3	3	1	1	3	3	3	3	3	3	1	1	3	3	1	3	3	1	1	3	1	1	3	3	3	3	3
7350	1	182	66	18	1	1	5	4	5	4	10	1	1	2	1	1	1	1	1	1	1	3	3	3	1	2	2	2	2	2	2	2	2	2	2	2	2	2	2	2	2	2	2	2	2	2	2	2	2
10076	2	171	65	18	1	1	5	4	5	4	10	2	1	1	2	1	1	5	1	1	2	3	3	3	3	2	3	3	3	2	3	3	1	2	3	2	1	3	2	3	3	3	3	3	3	2	3	3	2
7288	2	180	60	18	1	1	5	4	5	4	10	2	2	2	3	2	1	2	2	2	1	2	2	2	3	1	1	3	3	2	3	3	3	1	2	3	2	2	2	2	2	2	1	2	3	3	2	2	1
9560	1	179	60	18	1	1	5	4	5	4	10	3	2	1	3	1	1	1	1	1	5	2	2	2	2	2	2	2	3	2	2	2	3	1	2	2	1	3	2	2	2	3	2	2	3	2	2	2	1
7271	2	160	50	18	1	1	5	4	5	4	10	3	4	1	2	2	1	1	1	1	2	2	2	2	2	2	2	2	2	2	2	2	2	2	1	1	1	3	2	1	2	2	1	2	2	2	2	2	2
7687	2	158	48	18	1	1	5	4	5	4	10	3	3	2	3	3	2	3	3	2	1	2	2	2	2	2	2	2	2	2	1	2	2	1	2	1	2	2	1	2	1	2	2	1	2	2	1	2	2
8500	2	158	47	18	1	1	5	4	5	4	10	4	3	4	3	2	3	2	2	1	3	2	2	3	2	1	2	2	2	1	2	3	1	2	2	3	1	2	3	2	2	2	1	3	3	3	3	3	1
7663	2	155	47	18	1	1	5	4	5	4	10	3	2	3	3	1	2	1	4	1	5	2	2	2	2	2	2	3	3	3	3	3	3	3	3	2	1	3	2	2	2	2	2	2	2	3	3	3	2
7612	2	160	41	18	1	1	5	4	5	4	10	3	1	3	2	2	1	1	1	1	2	3	3	3	2	2	3	3	3	2	3	3	2	3	1	1	2	2	3	3	2	2	2	2	3	3	3	3	1
7795	1	180	85	18	1	0	5	4	5	4	10	2	2	1	2	1	1	1	1	1	3	2	3	3	3	3	3	2	2	1	3	2	3	2	1	1	1	2	2	2	2	3	2	3	2	2	2	2	2
8534	1	172	75	18	1	0	5	4	5	4	10	3	3	2	2	1	1	1	1	1	1	2	2	2	2	2	2	2	2	2	2	2	2	2	2	2	2	2	2	2	2	2	2	2	2	2	2	2	2
9655	1	180	70	18	1	0	5	4	5	4	10	5	4	4	2	4	2	3	4	1	2	2	2	2	2	2	3	2	3	2	2	3	2	2	2	3	1	2	2	3	2	3	2	2	2	2	2	2	2
7188	2	162	62	18	1	0	5	4	5	4	10	2	1	1	2	1	1	1	1	1	5	3	3	3	2	2	3	3	2	3	3	3	3	2	3	3	2	3	3	2	2	2	3	3	3	3	3	3	2
8336	2	160	50	18	0	0	5	4	5	4	10	2	1	3	3	1	1	1	1	1	3	2	3	3	2	2	3	2	2	2	2	2	3	2	2	2	1	3	2	1	1	2	1	1	2	2	1	2	2
7602	2	170	50	18	1	1	6	5	4	4	9	3	2	2	2	3	3	3	3	2	1	2	2	2	2	2	2	2	2	2	2	2	2	2	2	2	2	2	2	2	2	2	2	2	2	2	2	2	2
9739	2	172	68	18	1	1	5	4	5	5	9	2	1	1	3	1	1	1	1	1	3	2	2	2	2	2	2	2	2	2	2	2	3	2	2	2	1	2	2	2	2	3	2	2	2	2	2	2	2
9306	2	165	49	18	1	0	5	4	5	5	9	3	2	2	3	1	1	1	1	1	2	3	3	3	1	2	3	3	3	2	3	3	1	2	1	1	1	2	2	2	2	2	3	3	3	2	2	3	1
3149	1	178	170	18	1	1	5	5	5	4	9	2	2	1	3	1	1	1	1	1	3	1	2	2	3	2	2	2	2	2	2	2	2	2	2	2	2	2	2	2	2	2	2	2	2	2	2	2	2
9731	2	172	61	18	1	1	5	5	5	4	9	2	2	4	2	2	2	2	2	2	2	3	3	3	1	3	3	3	3	2	2	2	2	2	2	2	2	2	2	2	2	2	2	2	2	2	2	2	2
1001	2	160	40	18	1	0	5	5	5	4	9	2	2	2	2	3	3	3	3	3	3	2	2	2	2	1	1	1	1	2	2	2	2	3	3	3	3	2	2	2	2	1	1	1	1	2	2	2	2
8608	1	172	90	18	1	0	5	5	4	4	10	2	1	1	3	1	1	1	1	1	3	3	3	3	1	3	3	3	3	2	2	2	2	2	2	2	2	2	2	2	2	2	2	2	2	2	2	2	2
9209	2	161	50	18	1	1	5	5	5	5	8	1	1	5	2	5	1	1	3	1	5	1	2	3	3	1	3	3	3	3	3	3	2	3	1	1	1	3	3	1	1	3	1	3	3	3	3	3	2
7309	2	160	54	18	1	0	5	5	5	5	8	4	3	4	3	1	1	1	1	1	5	2	2	2	2	1	2	2	2	2	2	2	3	2	2	2	1	3	2	2	2	2	2	2	2	2	2	2	2
8665	1	175	86	18	1	0	5	5	3	5	10	2	3	2	2	5	5	5	5	5	1	3	3	3	1	3	3	3	3	1	3	3	1	3	3	3	3	1	3	3	3	3	3	3	3	3	3	3	3
10244	1	178	60	18	1	0	4	5	4	5	10	2	4	1	2	1	1	1	1	1	1	2	2	2	2	2	2	2	2	2	2	2	2	2	2	2	2	2	2	2	2	2	2	2	2	2	2	2	2
10434	2	162	63	18	1	1	6	5	5	1	10	2	1	2	2	1	1	1	1	1	1	3	3	3	2	3	3	2	3	2	3	3	2	2	3	2	3	2	3	3	3	3	3	3	3	3	3	3	3
7694	1	179	61.5	18	1	1	6	4	6	4	7	3	3	1	2	1	3	1	1	1	2	1	3	2	1	3	1	2	2	2	3	2	2	3	3	1	1	2	3	2	1	3	1	2	2	3	2	3	3
7891	1	180	89	18	0	1	6	4	4	3	10	2	1	1	2	1	1	1	1	1	1	3	3	3	1	3	3	3	3	1	3	3	1	3	3	3	3	1	3	3	3	3	3	3	3	3	3	3	3
9705	1	170	66.5	18	1	1	6	4	5	4	8	2	1	1	2	1	1	1	1	1	5	2	3	3	2	1	2	3	3	2	3	3	1	2	2	2	1	2	2	2	2	2	2	2	2	2	2	2	2
7072	2	170	56	18	0	1	6	4	5	4	8	3	4	4	3	3	3	3	3	3	4	2	2	2	2	2	2	2	2	2	2	2	2	2	2	2	2	2	2	2	2	2	2	2	2	2	2	2	2
10718	2	158	96	18	1	1	6	4	4	4	9	3	2	2	2	1	1	1	1	1	1	3	3	3	1	1	3	3	3	2	3	3	2	2	2	2	1	3	1	2	2	3	2	2	2	3	3	3	2
9604	2	160	65	18	1	1	5	4	5	3	10	3	2	3	2	3	1	2	1	1	5	2	3	3	1	1	2	2	3	2	2	2	3	2	1	2	1	2	2	1	2	2	1	1	2	3	2	3	1
8081	2	165	50	18	1	1	5	4	5	3	10	1	1	1	1	1	1	1	1	1	1	1	1	1	3	1	1	1	1	3	1	1	3	1	1	1	1	3	1	1	1	1	1	1	1	1	1	1	1
10539	2	168	43	18	1	0	5	4	5	3	10	3	1	2	2	3	3	4	5	1	4	2	2	2	2	2	2	2	2	3	2	2	2	2	2	2	2	2	2	2	2	2	1	2	2	3	3	3	3
7949	2	170	65	18	1	1	5	4	6	4	8	2	2	3	2	1	1	1	1	1	1	2	2	3	2	1	3	2	2	2	2	3	3	2	3	2	1	2	3	2	2	3	2	1	3	2	2	2	1
8751	1	180	73	18	1	1	6	5	5	4	7	3	2	2	3	2	1	1	1	1	5	2	3	3	1	2	3	2	2	2	3	2	2	2	1	2	2	3	2	2	2	2	1	1	2	2	2	2	1
9095	2	160	62	18	1	1	6	5	5	4	7	3	2	3	3	2	2	3	1	1	3	3	3	3	1	2	3	3	3	2	2	2	2	3	2	3	1	3	2	3	3	2	1	2	2	3	1	2	2
7292	2	163	60	18	1	0	6	5	5	4	7	3	3	3	3	3	4	3	3	1	4	2	2	2	2	1	2	2	2	2	2	2	2	2	2	2	2	2	2	2	2	2	2	2	2	2	2	2	2
7026	2	169	110	18	1	1	5	4	5	4	9	2	2	2	2	1	3	5	1	1	4	3	3	3	1	3	3	3	3	1	3	3	2	1	3	1	1	2	3	3	3	3	2	3	3	3	3	3	3
8282	2	166	85	18	1	1	5	4	5	4	9	3	3	3	3	3	3	3	3	1	4	2	2	2	2	2	2	2	2	2	2	2	2	2	2	2	2	2	2	2	2	2	2	2	2	2	2	2	2
1300	1	176	80	18	1	1	5	4	5	4	9	2	1	1	2	1	1	1	1	1	1	1	1	1	3	1	1	1	1	3	1	1	3	1	1	1	1	2	1	1	1	2	2	2	2	1	1	1	1
10669	1	174	68	18	1	1	5	4	5	4	9	2	2	2	2	2	2	2	2	2	3	2	3	3	3	1	3	2	2	2	2	2	3	1	2	2	1	2	2	2	2	2	1	2	2	3	3	3	1
6990	1	175	65	18	1	1	5	4	5	4	9	1	3	3	3	5	1	1	1	1	3	3	3	3	3	3	3	2	3	2	3	3	3	3	3	3	2	1	3	3	3	3	1	3	3	3	3	3	3
10637	2	174	65	18	1	1	5	4	5	4	9	2	1	3	2	1	1	1	1	1	1	3	3	3	1	1	3	3	2	1	3	3	1	3	3	3	1	2	3	3	3	3	3	3	3	3	3	3	3
8639	1	180	64	18	1	1	5	4	5	4	9	2	1	1	1	1	1	1	1	1	1	3	3	3	3	3	3	3	3	3	3	3	3	3	3	1	1	3	3	1	3	3	2	3	3	3	3	3	1
11201	1	182	60	18	1	1	5	4	5	4	9	2	2	2	3	1	1	1	1	1	1	2	3	3	1	2	2	3	3	2	3	3	3	2	2	1	1	2	3	3	3	1	1	3	3	3	3	3	1
8190	2	168	60	18	1	1	5	4	5	4	9	2	1	1	2	1	1	1	1	1	2	1	2	2	2	2	2	2	2	2	2	3	3	2	2	2	1	3	2	1	2	2	2	2	2	3	2	2	2
8845	1	170	55	18	1	1	5	4	5	4	9	2	1	2	2	1	1	1	1	1	1	2	3	3	3	3	3	3	2	2	3	3	3	3	1	2	1	3	3	3	2	2	2	3	2	3	3	3	3
8444	2	165	50	18	1	1	5	4	5	4	9	2	1	2	2	1	1	1	4	1	1	2	3	3	2	3	3	3	3	2	3	3	2	2	3	2	2	2	3	3	2	3	2	3	3	3	3	3	2
10655	1	180	66	18	0	0	5	4	5	4	9	3	1	1	3	1	1	1	1	1	1	3	3	3	1	2	3	2	3	1	3	3	2	2	1	1	1	3	2	3	2	3	1	3	3	2	3	3	3
8195	2	178	65	18	1	0	5	4	5	4	9	2	2	2	2	1	1	2	1	1	3	2	2	2	2	2	2	2	2	2	2	2	3	2	2	2	2	3	2	2	2	2	2	2	2	2	2	2	2
9084	1	168	52	18	1	0	5	4	5	4	9	3	2	2	2	2	1	4	1	1	3	3	3	3	2	2	3	2	3	2	3	3	2	2	2	2	1	3	2	2	2	2	2	2	2	2	3	3	2
9185	2	162	47	18	1	0	5	4	5	4	9	2	1	1	1	1	1	1	1	1	1	3	3	3	2	3	3	3	3	1	3	3	3	3	3	3	1	3	3	3	3	3	3	3	3	3	3	3	3
10319	2	163	62	18	1	1	6	5	4	4	8	3	2	2	2	1	1	3	2	1	3	2	2	2	2	3	3	2	2	2	2	2	3	1	2	2	1	2	2	1	2	2	2	2	2	2	2	2	2
9323	1	172	75	18	1	1	5	4	4	4	10	3	2	2	2	2	1	2	2	1	2	2	2	2	2	2	2	2	2	2	2	2	2	2	2	2	2	2	2	2	2	2	2	2	2	2	2	2	2
10618	1	175	83	18	1	1	5	4	5	5	8	2	1	2	2	1	1	1	1	1	3	2	2	3	2	1	3	3	3	3	3	3	3	1	3	3	1	3	3	2	3	3	3	3	3	3	3	3	3
8373	2	165	56	18	1	1	5	4	5	5	8	4	3	3	2	1	1	1	1	1	1	2	2	3	2	2	3	2	3	2	3	2	1	2	3	2	2	2	2	2	2	2	2	2	2	2	2	2	2
8040	1	184	75	18	1	1	5	5	5	4	8	4	3	5	3	2	1	1	2	1	5	3	2	3	1	2	3	3	2	2	3	3	1	3	1	2	1	3	2	3	3	3	1	1	3	3	3	3	3
7498	2	162	54	18	1	1	5	5	5	4	8	3	2	3	2	1	1	1	1	1	2	2	2	2	2	2	2	2	2	2	2	2	2	2	2	2	2	2	2	2	2	2	2	2	2	2	2	2	2
9692	2	158	45	18	1	1	5	5	5	4	8	2	1	2	2	1	3	1	1	1	2	2	3	3	2	3	3	3	3	1	3	3	3	3	3	2	1	3	3	1	3	3	2	3	3	3	3	3	2
7723	1	182	90	18	1	0	5	5	5	4	8	3	3	3	2	2	1	2	3	1	3	3	3	3	2	1	3	3	3	3	3	3	2	3	3	3	1	2	3	3	3	1	3	3	2	3	3	3	3
7709	1	177	78	18	0	0	5	5	5	4	8	3	3	5	3	3	3	4	1	1	3	3	3	3	1	2	3	3	3	1	3	3	1	2	3	3	1	2	2	2	3	3	3	2	2	3	3	3	2
9049	1	175	60	18	1	1	4	4	5	4	10	2	1	1	2	1	1	1	1	1	1	2	3	3	2	2	2	3	3	1	3	3	3	2	2	1	1	3	1	1	2	2	2	1	3	2	3	3	2
8631	1	176	85	18	1	1	5	5	4	4	9	5	5	5	4	5	4	5	5	3	3	2	1	3	1	2	3	1	1	3	2	2	2	3	2	3	1	2	3	3	2	3	1	3	3	3	2	3	3
8494	2	164.3	62	18	1	0	5	5	4	4	9	2	2	3	3	2	1	1	1	1	3	1	2	2	2	2	2	2	2	2	2	2	2	2	2	2	2	2	2	2	2	2	2	2	2	2	2	2	2
7705	2	167	104	18	1	1	5	5	5	5	7	1	1	1	1	1	1	1	1	1	1	1	3	3	2	3	2	2	2	2	2	2	2	2	2	2	2	2	2	2	2	2	2	2	2	2	2	2	2
8748	1	179.4	76	18	1	1	5	5	5	5	7	2	2	2	2	1	1	2	1	1	5	3	3	3	2	3	3	3	3	3	3	3	3	3	3	3	1	3	3	3	3	2	3	3	3	3	3	3	3
9834	1	177	124	18	1	1	4	4	4	5	10	1	1	1	1	1	1	1	1	1	1	3	3	3	1	3	3	3	3	1	3	3	1	3	3	3	3	1	3	3	3	3	3	3	3	3	3	3	3
9791	1	180	140	18	0	1	4	5	3	5	10	2	1	1	1	1	1	1	1	1	1	3	3	3	3	3	3	3	3	1	3	3	1	3	3	3	3	1	3	3	3	3	3	3	3	3	3	3	3
7570	2	168	55	18	1	1	6	4	6	4	6	2	1	4	2	1	1	1	1	1	4	2	2	2	2	2	2	2	2	2	2	2	2	2	2	2	2	2	2	2	2	2	2	2	2	2	2	2	2
8627	1	165	100	18	1	0	6	4	6	4	6	2	2	2	2	1	1	1	1	1	1	2	3	3	2	3	3	3	3	2	3	3	2	2	2	2	1	2	3	2	3	2	3	3	3	2	3	3	2
10247	1	181	52	18	0	1	5	2	5	4	10	3	2	2	3	2	2	2	2	2	3	2	2	2	2	2	2	2	2	2	2	2	2	2	2	2	2	2	2	2	2	2	2	2	2	2	2	2	2
9717	1	168	53	18	1	0	5	3	5	3	10	3	4	2	2	2	2	1	1	1	1	3	3	3	2	3	3	3	3	3	3	3	3	2	3	2	1	3	2	1	3	3	3	3	3	3	3	3	3
7508	1	184	76	18	1	1	6	4	5	4	7	2	2	3	2	1	1	1	1	1	5	3	3	3	2	2	3	3	3	2	3	3	3	2	1	2	1	3	2	2	2	2	1	2	3	2	3	3	2
9864	1	170	60	18	1	1	5	4	6	3	8	3	3	2	3	1	1	1	1	1	1	2	2	2	2	2	2	2	2	2	2	2	2	2	2	2	2	2	2	2	2	2	2	2	2	3	3	3	3
9865	1	170	60	18	1	1	5	4	6	3	8	3	3	2	3	1	1	1	1	1	1	2	2	2	2	2	2	2	2	2	2	2	2	2	2	2	2	2	2	2	2	2	2	2	2	3	3	3	3
7254	1	169	60	18	1	1	5	3	5	4	9	2	1	3	2	2	1	2	2	1	3	3	3	3	1	2	3	3	3	1	3	3	2	2	2	2	2	2	2	2	2	2	2	2	2	2	2	2	2
9391	1	191	125	18	1	1	5	4	6	4	7	3	2	2	2	1	1	1	1	1	3	3	3	3	1	3	3	3	3	3	3	3	1	3	1	3	2	2	3	3	3	1	3	2	3	3	3	3	1
9259	1	177.4	74.5	18	1	1	5	4	6	4	7	3	3	4	3	1	1	1	3	1	1	3	3	3	1	2	3	3	3	1	3	3	2	2	2	2	1	3	2	3	3	2	1	2	3	3	2	3	2
9343	2	164	82	18	1	1	5	3	5	5	8	3	2	2	3	1	1	1	1	1	3	3	3	3	1	1	3	3	3	1	3	3	1	3	1	3	3	1	3	3	3	3	2	3	3	3	3	3	2
7246	1	178	75	18	1	1	5	4	5	4	8	3	2	3	2	1	1	1	1	1	1	2	2	2	2	2	2	2	2	2	2	2	2	2	2	2	2	2	2	2	2	2	2	2	2	2	2	2	2
9843	1	175	65	18	1	1	5	4	5	4	8	2	2	2	2	1	1	1	1	1	1	3	3	3	3	2	3	3	3	2	2	2	2	2	2	2	2	2	2	2	2	2	2	2	2	2	2	2	2
9663	1	168	65	18	1	1	5	4	5	4	8	2	1	2	2	1	1	1	1	1	3	2	2	2	2	2	2	2	2	2	2	2	2	2	2	2	2	2	2	2	2	2	2	2	2	2	2	2	2
7134	2	175	62	18	1	1	5	4	5	4	8	3	4	2	2	1	1	1	3	1	5	3	3	3	3	3	3	3	3	2	3	3	2	1	2	1	1	3	2	1	1	2	2	3	3	3	3	3	2
8193	1	170	60	18	1	1	5	4	5	4	8	2	1	2	2	3	3	1	1	1	5	2	2	2	2	2	2	2	2	2	2	2	2	2	2	2	2	2	2	2	2	2	2	2	2	2	2	2	2
8202	1	170	60	18	1	1	5	4	5	4	8	3	2	1	2	1	1	1	1	1	5	2	3	3	2	3	3	3	3	3	3	3	1	3	3	3	1	3	3	1	3	1	3	1	3	1	3	1	3
8998	2	160	60	18	1	1	5	4	5	4	8	2	1	2	2	1	1	1	1	1	5	2	3	2	3	1	2	3	2	2	3	3	3	2	1	2	1	3	1	1	2	3	2	2	2	2	2	3	2
8056	2	172	56	18	1	1	5	4	5	4	8	2	1	1	2	1	1	1	1	1	5	3	3	3	1	3	3	2	3	1	3	3	1	3	3	3	1	2	3	2	3	3	2	3	3	3	3	3	3
7824	1	170	56	18	1	1	5	4	5	4	8	3	2	2	2	3	3	3	1	2	3	1	2	3	2	2	2	2	2	2	2	2	2	1	2	1	3	2	2	2	2	2	2	3	1	2	3	2	1
9470	2	160	56	18	0	1	5	4	5	4	8	1	1	4	2	1	1	1	1	1	2	2	2	2	2	2	2	2	2	2	2	2	2	2	1	2	1	2	2	2	2	2	1	1	2	2	2	2	1
7751	2	166	50	18	1	1	5	4	5	4	8	3	3	1	2	3	1	3	3	1	2	2	3	3	2	3	2	2	2	2	2	2	2	2	2	2	1	2	2	2	2	2	1	2	2	2	1	2	2
9109	2	151	48.5	18	1	1	5	4	5	4	8	2	1	2	2	2	1	2	1	1	1	2	2	2	2	1	2	2	3	2	3	2	3	2	2	2	1	3	2	2	2	2	3	2	3	3	2	3	2
10796	2	167	46	18	1	1	5	4	5	4	8	2	2	1	2	1	1	1	1	1	1	3	3	3	1	3	3	3	3	1	3	3	1	2	3	1	1	2	2	2	2	3	2	2	2	2	3	3	2
8621	1	181	140	18	1	0	5	4	5	4	8	4	2	3	3	3	1	1	1	1	2	2	3	3	3	1	3	2	3	2	3	3	3	2	3	2	1	3	3	2	2	3	1	3	3	3	3	3	2
10302	2	162	60	18	1	0	5	4	5	4	8	3	2	2	2	3	1	2	1	1	3	2	2	2	2	2	2	2	2	2	2	2	2	2	2	2	2	2	2	2	2	2	1	2	2	2	2	2	2
10067	2	150	60	18	0	0	5	4	5	4	8	3	2	3	2	2	2	4	1	1	3	2	2	3	1	1	3	2	3	1	3	3	3	2	2	3	1	2	2	2	2	3	2	2	2	2	2	2	2
7547	2	160	49	18	1	0	5	4	5	4	8	2	2	2	2	1	1	3	1	1	1	2	2	2	2	2	2	2	2	2	2	2	2	2	1	2	1	2	2	2	2	3	2	2	2	2	2	2	1
10150	2	170	55	18	1	0	5	5	5	3	8	2	2	2	2	1	1	1	1	1	2	2	2	2	2	2	3	2	2	2	2	2	3	2	2	2	2	3	2	2	2	2	1	2	2	2	2	2	2
9687	2	166	60	18	1	1	4	3	5	4	10	2	2	4	2	1	1	1	1	1	1	3	3	3	2	2	3	2	3	2	3	3	2	2	2	3	1	3	2	1	2	2	2	3	3	3	3	3	3
8595	1	173	50	18	1	1	4	3	5	4	10	4	3	4	2	1	1	1	5	1	1	2	3	3	1	1	3	3	3	2	3	3	3	3	2	2	1	3	3	3	3	3	3	3	3	3	3	3	3
8084	1	176	68	18	1	1	5	4	4	4	9	2	1	2	2	1	1	1	1	1	2	2	2	2	2	1	1	2	2	2	2	2	3	1	2	1	1	3	2	2	2	2	1	2	2	2	2	2	1
8794	1	175	63	18	1	1	5	4	4	4	9	2	1	1	2	1	1	1	1	1	1	3	3	3	1	1	3	3	3	2	2	3	3	2	3	2	1	3	3	2	3	3	2	2	2	2	2	3	3
6900	2	163	56	18	1	1	5	4	4	4	9	2	2	1	2	1	3	2	1	1	1	2	3	3	1	3	3	3	3	2	2	3	3	2	2	3	1	2	3	3	3	3	3	3	3	3	3	3	3
8841	1	175	50	18	0	0	5	4	4	4	9	2	2	2	2	1	1	1	1	1	1	1	1	1	3	1	1	1	1	3	1	1	3	1	1	1	1	3	1	1	1	1	1	1	1	1	1	1	1
8455	2	174	50	18	1	0	5	4	4	4	9	2	1	2	2	3	3	3	3	3	2	2	2	2	2	2	2	2	2	2	2	2	2	2	2	2	2	2	2	2	2	2	2	2	2	2	2	2	2
8132	2	170	72	18	1	1	5	4	5	5	7	2	2	2	2	1	1	1	1	1	4	2	2	2	2	1	3	2	1	2	2	2	2	2	2	1	1	3	2	3	2	2	1	1	2	2	2	2	2
8047	1	180	135	18	1	1	5	5	5	4	7	3	2	2	2	1	1	3	1	1	3	2	2	2	2	2	2	2	2	2	2	3	3	3	1	3	1	3	3	3	3	3	2	3	3	3	3	3	3
8244	2	174	100	18	1	1	5	5	5	4	7	3	3	5	2	3	3	3	3	1	5	2	3	1	1	1	3	1	1	2	3	3	3	3	1	3	1	1	1	3	3	3	1	3	3	3	3	3	3
7733	1	180	74	18	1	1	5	5	5	4	7	3	3	3	3	1	1	1	1	1	1	1	3	3	1	3	3	3	3	3	3	3	2	3	2	3	1	2	3	3	2	3	2	2	3	3	3	3	3
8095	2	165	55	18	1	1	5	5	5	4	7	3	4	3	2	2	2	2	2	1	4	2	2	1	2	1	2	3	3	2	2	2	2	3	3	2	1	2	1	2	2	2	1	2	2	2	2	2	2
8774	2	158	52	18	1	1	5	5	5	4	7	3	3	4	2	2	1	1	1	1	3	3	2	2	2	2	3	3	3	1	3	3	3	2	2	3	1	3	2	2	3	3	3	3	3	3	3	3	3
9088	2	153	51	18	1	1	5	5	5	4	7	4	3	3	3	3	2	3	1	1	5	2	2	3	2	3	3	2	3	1	3	3	2	2	3	3	1	2	2	3	3	2	2	2	2	2	2	2	1
10504	2	160	47	18	1	1	5	5	5	4	7	3	3	3	2	1	1	1	1	1	3	2	3	3	2	1	2	3	2	2	3	3	3	2	3	2	1	3	3	2	2	3	2	3	3	3	2	3	2
9935	2	163	53	18	1	0	5	5	5	4	7	3	2	3	3	3	1	2	3	1	5	1	2	2	1	2	3	3	2	1	3	3	3	2	3	3	1	3	3	2	3	3	1	2	3	3	2	3	3
8826	1	173	75	18	1	0	5	5	3	3	10	3	2	2	3	3	1	2	1	1	3	2	2	3	1	1	3	2	3	1	3	2	2	3	3	3	1	2	2	3	2	3	1	3	3	3	3	3	3
7447	2	168	52	18	1	1	5	5	4	4	8	2	1	1	2	1	1	1	1	1	1	3	3	3	1	3	3	3	3	1	3	3	1	3	3	3	1	3	3	3	3	3	3	3	3	3	3	3	3
7821	2	164	110	18	1	0	5	5	4	4	8	2	1	2	2	2	1	2	1	1	2	2	2	2	2	1	2	2	2	3	2	3	1	2	2	2	1	2	3	2	2	2	2	2	3	2	2	3	2
9230	2	174	68	18	1	1	5	5	5	5	6	2	1	2	3	1	1	1	1	1	3	3	3	3	1	3	3	3	3	1	3	3	2	2	3	3	1	2	3	2	3	2	2	2	2	3	3	3	3
6859	1	178	53.5	18	1	1	5	5	5	5	6	1	2	5	2	1	1	1	1	1	1	3	3	3	1	1	3	2	2	2	2	2	3	3	1	3	1	3	3	3	1	3	1	1	3	2	2	2	2
10301	2	162	55	18	1	1	4	4	4	4	10	2	1	1	2	2	2	2	2	2	3	2	2	2	2	2	2	2	2	2	2	2	3	2	2	2	2	2	2	2	2	2	2	2	2	2	2	2	2
10580	1	188	85	18	1	0	5	5	4	5	7	3	2	1	2	1	1	1	1	1	1	2	2	2	2	2	2	2	2	2	2	2	2	2	2	2	2	2	2	2	2	2	2	2	2	2	2	2	2
8596	1	188	60	18	1	1	4	5	5	4	8	2	2	2	2	2	2	2	2	2	1	2	2	2	2	2	2	2	2	2	2	2	2	2	2	2	2	2	2	2	2	2	2	2	2	2	2	2	2
10369	1	180	70	18	1	1	6	4	4	1	10	3	2	2	2	1	1	1	1	1	1	1	2	2	2	2	2	2	2	2	3	3	3	2	1	1	1	3	1	2	2	3	2	2	2	2	2	2	1
7340	2	161	55	18	1	0	6	4	3	3	9	3	2	4	2	2	2	2	1	1	5	2	2	3	2	1	3	2	3	2	2	2	2	2	2	2	1	2	2	1	1	2	2	2	2	3	3	3	2
10660	1	180	65	18	1	1	5	3	5	4	8	1	1	2	2	1	1	1	1	1	1	3	3	2	1	2	3	3	3	3	3	2	3	2	1	1	1	3	2	2	2	3	3	1	2	2	2	2	1
8555	2	164	55	18	1	1	5	5	4	1	10	3	3	3	2	2	4	5	3	1	3	3	3	3	1	3	3	3	3	1	3	3	1	3	3	3	1	3	1	2	3	3	1	2	3	3	3	3	1
9995	2	165	60	18	1	1	5	4	4	3	9	3	2	1	2	1	1	1	1	1	3	2	3	3	1	2	3	3	3	2	3	3	3	2	2	3	1	3	3	2	2	2	2	3	3	2	3	3	3
7871	1	182	90	18	0	1	5	4	5	4	7	2	2	2	3	3	3	3	3	3	3	2	2	2	2	2	2	2	2	2	2	2	2	2	2	2	2	2	3	3	2	2	2	1	2	2	2	2	2
8551	1	182	86	18	1	1	5	4	5	4	7	3	2	2	2	4	3	5	2	1	3	3	2	2	2	1	3	2	2	3	3	3	3	1	1	1	1	3	3	3	2	3	1	1	3	3	2	2	3
7045	1	175	79	18	1	1	5	4	5	4	7	2	2	2	2	2	2	2	2	1	3	3	3	3	2	2	3	3	3	1	3	3	3	3	1	3	1	3	2	2	2	2	3	3	3	2	3	3	2
8906	2	165	67	18	1	1	5	4	5	4	7	5	4	5	3	3	4	2	4	1	4	2	3	3	2	2	2	2	3	2	3	2	3	2	1	2	1	3	2	3	2	3	1	2	3	2	2	3	2
7050	2	156	60	18	1	1	5	4	5	4	7	2	1	3	2	1	1	1	1	1	5	2	3	3	1	2	2	2	2	2	2	1	3	2	2	2	1	3	2	2	2	2	2	2	2	2	2	2	2
8308	2	168	55	18	1	1	5	4	5	4	7	2	1	4	2	1	1	1	1	1	3	3	2	3	1	2	3	2	2	3	2	2	2	3	2	2	1	3	2	2	1	3	1	1	3	3	2	3	1
9091	1	171	53	18	1	1	5	4	5	4	7	2	2	1	2	1	1	1	1	1	1	2	3	3	3	3	3	3	3	3	3	3	3	2	3	2	1	2	3	3	1	3	3	3	3	3	3	3	3
10065	2	163	48	18	1	1	5	4	5	4	7	4	3	5	2	3	3	3	1	1	3	3	3	3	1	1	3	2	2	2	2	2	3	2	3	1	1	3	3	3	2	3	2	3	3	3	2	3	2
9610	1	175	73	18	1	0	5	4	5	4	7	2	4	1	3	1	1	3	1	1	1	3	3	3	1	3	3	3	3	1	3	3	1	3	3	3	3	1	3	3	3	3	3	3	3	3	3	3	3
10598	2	160	41	18	1	0	5	4	5	4	7	3	2	4	2	3	1	2	1	1	3	2	2	2	2	2	2	2	2	2	2	2	2	2	2	2	2	1	2	2	2	2	2	2	2	1	2	2	2
8966	1	172	74	18	1	1	5	5	5	3	7	3	2	2	3	2	2	1	1	1	3	3	3	3	1	1	2	2	3	2	3	3	3	2	1	2	1	2	2	2	2	2	1	2	2	2	2	2	2
7060	2	168	52	18	0	1	4	2	5	5	9	2	4	2	2	1	1	1	1	1	2	3	3	3	1	3	3	3	3	2	3	3	2	2	2	2	2	2	2	2	2	2	2	2	2	2	2	2	2
7211	2	164	66	18	1	0	4	3	5	4	9	2	1	1	2	1	1	1	1	1	1	3	3	3	1	3	3	3	3	3	3	3	3	1	3	2	1	3	3	2	3	3	1	1	3	3	3	3	2
10728	2	177	170	18	1	1	5	4	4	4	8	2	2	1	3	1	1	1	1	1	2	3	3	3	1	1	3	2	2	1	3	3	3	2	1	3	1	2	2	2	2	3	1	2	3	3	3	3	1
10131	1	175	68	18	1	1	5	4	4	4	8	2	1	1	2	1	1	1	1	1	1	2	2	3	3	2	2	2	2	3	3	3	3	2	2	2	1	3	2	1	2	3	2	3	3	3	3	3	3
8064	2	155	48	18	1	1	5	4	4	4	8	2	1	1	2	1	1	1	1	1	5	2	3	3	1	3	3	3	3	2	3	2	3	1	3	2	1	2	3	2	2	3	2	2	3	3	3	3	2
9426	1	173.7	65	18	0	0	5	4	4	4	8	2	1	1	2	1	1	1	1	1	2	1	2	2	2	2	2	2	2	2	2	2	3	2	2	2	1	2	2	2	2	3	2	2	2	2	3	3	3
9053	2	170	60	18	1	0	5	4	4	4	8	2	2	3	2	1	1	1	1	1	1	1	2	2	2	1	3	2	3	3	3	3	3	2	3	1	1	2	3	1	3	3	2	3	3	3	3	3	3
9023	1	162	55	18	1	0	5	4	4	4	8	3	2	1	3	3	1	1	1	1	3	3	3	3	1	2	3	3	2	2	2	2	3	1	3	1	1	3	1	3	1	1	2	3	2	3	3	3	2
7654	1	187	110	18	0	1	4	3	5	5	8	2	2	1	2	1	1	1	1	1	2	2	3	3	2	2	3	3	3	2	3	2	3	2	3	3	1	3	2	3	3	3	2	2	3	3	2	2	2
7051	2	170	60	18	1	1	4	4	5	4	8	2	1	1	2	1	1	1	1	1	1	2	3	3	2	2	2	3	3	2	3	3	3	1	2	1	1	3	2	1	1	2	1	2	3	3	3	3	3
8109	2	168	61	18	1	1	5	5	4	4	7	2	1	1	2	1	1	1	1	1	1	2	2	2	2	1	2	2	2	2	2	2	3	2	2	2	1	3	2	1	2	2	2	2	2	2	2	3	2
10690	1	180	67	18	1	1	5	5	5	5	5	2	1	1	2	1	1	1	1	1	1	1	3	3	1	1	2	2	2	2	2	2	2	2	2	2	2	2	2	2	2	2	2	2	2	2	2	2	2
10276	1	178	67	18	1	1	5	5	5	5	5	2	1	2	2	2	2	2	2	2	1	2	2	2	2	2	2	2	2	2	2	2	2	2	2	2	2	2	2	2	2	2	2	2	2	2	2	2	2
9773	2	174	57	18	1	1	5	5	5	5	5	3	2	4	3	1	3	2	2	1	4	2	2	2	2	1	2	2	2	2	2	2	2	2	2	2	1	2	2	2	3	2	1	1	2	2	2	2	2
10422	2	164	56	18	0	0	5	5	5	5	5	1	1	1	1	2	1	2	1	1	1	2	2	2	2	2	2	2	2	2	2	2	2	2	2	2	2	2	2	2	2	2	2	2	2	2	2	2	2
8758	1	189	76	18	1	1	4	4	4	4	9	2	1	1	2	1	1	1	1	1	1	1	2	2	3	2	2	3	3	3	3	3	3	1	1	1	1	3	1	1	1	1	1	1	1	2	2	2	2
6998	1	172	69	18	1	1	4	4	4	4	9	2	2	1	2	1	1	1	1	1	1	3	3	3	1	3	3	3	3	1	3	3	1	3	3	3	3	1	3	3	3	3	3	3	3	3	3	3	3
6930	2	168	58	18	1	1	4	5	4	4	8	4	5	2	3	1	1	1	2	1	3	3	3	3	1	3	3	3	3	2	3	3	2	3	3	3	2	2	3	3	3	3	2	3	3	3	3	3	2
9679	2	153	56	18	1	1	4	5	4	4	8	3	2	2	3	1	3	3	3	1	2	3	3	3	3	3	3	3	3	2	3	3	3	2	2	1	1	3	2	2	1	3	3	3	3	3	3	3	2
7248	1	182	82	18	1	1	4	5	5	5	6	2	2	2	2	1	1	1	3	1	3	2	3	2	3	2	3	2	2	2	2	2	2	3	1	2	1	2	1	1	3	3	2	1	2	2	1	1	2
10638	2	165	55	18	0	1	4	5	3	4	9	3	3	3	2	2	1	1	2	1	2	2	3	3	1	2	3	3	2	1	2	3	3	2	2	2	2	2	3	2	2	3	2	3	3	3	3	3	2
8002	1	175	75	18	0	1	3	5	3	5	9	2	1	1	2	3	3	3	1	1	2	2	3	3	2	3	3	2	2	1	3	3	3	2	3	3	1	3	3	3	3	3	3	3	3	3	3	3	2
7786	2	172	49	18	1	0	3	5	3	5	9	2	2	1	2	3	3	3	3	3	1	3	3	3	1	3	3	3	3	1	3	3	1	3	3	3	3	1	3	3	3	3	3	3	3	3	3	3	3
10784	1	178	70	18	1	0	3	5	2	5	10	2	1	2	2	2	2	2	2	1	3	3	3	3	2	2	2	2	2	2	2	3	2	2	1	3	1	2	3	2	2	3	1	3	1	3	3	3	2
8137	1	182	60	18	1	1	2	5	3	5	10	5	2	3	2	1	1	1	1	1	2	2	2	2	2	2	2	3	2	1	3	3	3	2	2	1	1	3	2	2	2	2	2	3	3	3	3	3	2
9929	2	172	56	18	1	1	5	2	5	3	9	2	1	1	2	1	1	1	1	1	1	3	3	3	1	3	3	3	3	1	3	3	1	3	3	3	3	1	3	3	3	3	3	3	3	3	3	3	3
9236	2	162	55	18	1	1	5	4	5	1	9	3	2	2	2	1	1	1	1	1	3	2	2	2	2	1	2	3	3	2	2	2	2	2	2	2	1	2	2	2	2	2	2	2	2	3	3	3	2
7300	2	161	50	18	1	1	5	2	5	4	8	3	2	4	2	2	1	1	1	1	3	2	2	3	2	2	2	3	3	2	3	3	2	2	3	2	1	2	2	2	2	2	1	2	2	3	3	3	2
8167	1	176	64	18	1	1	5	4	4	2	9	5	5	1	3	4	5	5	3	1	3	3	3	3	1	1	3	2	2	2	2	2	2	2	2	2	2	2	2	2	2	2	2	2	2	2	2	2	2
7334	2	170	52	18	1	0	5	4	4	2	9	3	2	3	2	1	1	1	1	1	5	2	2	2	2	1	2	2	1	2	2	2	2	1	2	2	2	2	2	3	2	2	1	1	2	2	2	2	2
8274	1	188	75	18	1	0	5	2	3	4	10	3	3	3	3	3	3	3	3	3	2	2	2	2	2	2	2	2	2	2	2	2	2	2	2	2	2	2	2	2	2	2	2	2	2	2	2	2	2
9346	1	181	63	18	1	1	5	4	5	3	7	3	1	2	3	1	1	1	1	1	2	3	3	3	3	3	3	3	3	3	3	3	3	3	3	3	1	3	3	3	3	3	2	3	3	3	3	3	3
10091	1	170	120	18	1	0	5	4	5	3	7	2	2	1	2	1	1	1	1	1	1	1	3	3	1	3	3	2	3	2	3	3	2	1	3	2	1	2	2	1	3	3	2	3	3	2	2	2	2
9798	1	170	55	18	1	0	5	5	3	1	10	4	2	3	2	2	1	1	1	1	3	2	2	2	2	1	2	2	2	2	2	2	2	2	1	2	1	2	2	2	2	2	2	2	2	2	2	2	2
7201	2	162	47	18	1	1	5	4	4	3	8	1	1	4	2	1	1	1	1	1	1	3	3	3	1	3	3	3	3	1	3	3	3	1	1	3	1	2	2	2	2	2	2	2	2	2	2	2	2
7670	2	167	46	18	1	1	5	4	4	3	8	2	2	2	2	1	2	2	1	1	1	3	3	3	1	3	3	3	3	1	3	3	3	2	3	3	1	2	3	2	3	3	2	3	3	3	3	3	3
9149	2	163	65	18	1	1	5	3	5	5	6	2	1	2	3	2	2	2	1	1	2	3	3	3	3	3	3	2	3	1	3	3	2	2	3	2	1	3	3	2	2	3	2	3	3	3	3	3	2
9271	2	159	98	18	1	1	5	4	5	4	6	3	4	4	3	3	1	1	3	1	5	1	3	2	1	3	3	2	3	1	2	1	1	2	1	2	1	2	1	3	3	3	3	1	1	1	2	3	3
6902	1	173	94	18	0	1	5	4	5	4	6	2	2	3	2	2	2	2	2	1	3	3	3	3	1	3	3	3	3	3	3	3	3	1	1	2	1	3	2	3	3	3	3	2	3	3	3	3	2
10502	2	162	70	18	1	1	5	4	5	4	6	2	1	1	2	1	1	1	1	1	1	3	3	3	1	3	3	3	3	2	3	3	3	1	3	3	1	3	3	2	2	2	3	3	3	3	3	3	3
7365	2	167	65	18	1	1	5	4	5	4	6	2	1	2	3	1	1	1	1	1	3	1	1	1	3	1	3	2	1	2	2	2	2	2	1	2	1	3	2	1	2	2	1	1	2	2	1	2	1
9611	2	160	50	18	1	1	5	4	5	4	6	2	1	2	2	2	2	2	2	1	1	2	2	2	2	2	2	2	3	3	3	3	3	2	2	2	1	2	2	2	2	2	1	2	2	2	3	3	2
8651	1	175	72	18	1	1	4	2	4	4	10	1	3	2	2	1	1	1	3	1	2	2	3	3	2	2	3	3	3	1	3	2	3	1	1	2	1	2	1	1	2	2	1	1	2	1	2	2	1
10137	2	164	58	18	1	0	4	3	4	3	10	2	1	2	2	1	5	3	1	1	5	3	3	3	1	3	3	3	3	1	3	3	1	3	3	3	3	1	3	3	3	3	3	3	3	3	3	3	3
6895	1	184	83	18	1	1	4	2	5	5	8	3	2	5	3	3	3	3	3	3	3	2	2	2	2	2	2	2	2	2	2	2	2	2	2	2	2	2	2	2	2	2	2	2	2	2	2	2	2
10488	2	165	59	18	1	1	4	3	5	4	8	4	2	5	2	1	1	1	5	1	3	3	3	3	1	1	3	2	2	2	3	3	3	2	3	3	2	3	3	3	3	3	2	3	3	3	3	3	3
10154	2	168	75	18	1	1	5	4	4	4	7	3	2	3	3	3	3	3	3	1	3	2	2	2	2	2	2	2	2	2	2	2	2	2	2	2	2	2	2	2	2	2	2	2	2	2	2	2	2
8920	1	178	62	18	1	1	5	4	4	4	7	2	2	2	2	1	1	1	2	1	2	2	2	2	2	1	2	2	2	2	3	2	3	2	1	2	1	2	2	2	2	2	2	2	2	3	2	2	2
8159	2	155	54	18	1	1	5	4	4	4	7	3	4	1	3	3	4	4	3	4	3	3	3	3	1	3	3	2	3	1	3	3	3	2	2	2	2	3	1	2	3	3	1	2	2	1	1	1	1
10158	2	160	52	18	1	1	5	4	4	4	7	3	3	3	3	3	3	3	3	3	2	2	2	2	2	2	2	2	2	2	2	2	2	2	2	2	2	2	2	2	2	2	2	2	2	2	2	2	2
7829	2	164	50	18	1	1	5	4	4	4	7	3	2	2	2	3	1	2	1	1	3	2	3	2	2	2	2	2	3	2	2	2	2	2	2	2	2	2	2	2	3	3	3	2	3	2	2	2	3
10336	2	160	50	18	1	1	5	4	4	4	7	3	3	3	2	3	3	3	3	1	3	2	2	2	2	2	2	2	2	2	2	2	2	2	2	2	2	2	2	2	2	2	2	2	2	2	2	2	2
8128	1	180	60	18	1	1	4	4	5	3	8	4	4	2	3	2	1	2	1	1	1	2	2	2	2	2	2	2	2	2	2	2	2	2	2	2	2	2	2	2	2	2	2	2	2	2	2	2	2
8456	2	163	50	18	1	1	5	5	4	3	7	3	2	2	3	1	3	1	1	1	3	3	3	3	2	1	3	2	3	2	3	3	2	2	2	2	1	2	3	3	2	3	1	3	3	3	3	3	2
10494	1	180	55	18	1	1	5	5	5	4	5	3	2	2	2	1	1	1	1	1	2	3	3	3	2	2	3	3	3	2	3	3	2	3	1	1	1	2	2	2	3	2	1	1	3	2	3	3	1
7494	1	180	67	18	1	0	5	5	5	4	5	3	2	3	2	1	1	1	1	1	3	2	3	2	3	1	3	2	3	2	2	2	3	2	2	2	1	3	2	2	2	3	2	2	2	2	2	2	2
8447	2	160	56	18	1	0	5	5	5	4	5	2	1	3	3	1	1	1	1	1	3	3	3	3	2	2	3	2	2	2	3	2	3	1	3	2	1	3	2	2	3	3	1	3	3	2	2	3	3
10477	1	175	83	18	1	1	4	3	5	5	7	3	2	4	3	2	1	1	1	1	4	3	3	3	1	2	3	3	3	2	3	3	3	3	2	3	1	2	2	3	3	3	2	3	3	3	3	3	2
9421	1	185	100	18	0	1	4	4	5	4	7	2	4	1	2	1	1	1	1	1	2	2	2	2	2	2	2	2	2	2	2	2	2	2	2	2	2	2	2	2	2	2	2	2	2	2	2	2	2
10009	1	165	80	18	1	1	4	4	5	4	7	2	1	1	2	1	1	1	1	1	1	3	3	3	2	2	2	3	3	2	3	3	3	1	1	1	1	2	3	2	2	2	1	2	2	2	2	2	2
8457	1	183	75	18	1	1	4	4	5	4	7	5	3	5	3	2	1	5	1	1	3	3	3	3	2	1	3	2	2	2	2	2	3	3	3	1	1	3	3	1	3	2	1	3	3	3	2	3	3
8221	2	169	49.5	18	0	1	4	4	5	4	7	2	1	2	2	1	1	2	1	1	1	2	2	2	3	2	2	2	2	2	2	2	3	2	3	1	1	2	2	1	2	2	2	2	2	2	2	3	2
9196	2	174	70	18	0	1	4	4	4	4	8	3	4	1	2	1	2	1	2	1	2	2	2	2	2	2	1	2	2	3	2	2	2	2	2	2	1	2	2	2	2	2	1	2	2	2	2	2	2
7902	2	170	58	18	1	1	4	4	4	4	8	3	4	3	3	4	4	4	4	3	4	1	1	1	2	1	3	2	1	2	1	1	2	2	1	2	1	3	2	2	2	2	1	2	2	3	3	2	1
9587	1	166	50	18	0	1	4	4	4	4	8	2	2	1	3	1	1	1	1	1	5	3	3	3	3	3	3	3	3	3	3	3	3	3	1	3	3	2	2	2	2	2	2	2	2	2	2	2	2
10204	1	173	58.5	18	1	0	4	4	4	4	8	3	2	3	2	1	1	1	1	1	3	2	2	2	2	2	3	3	3	1	3	3	1	3	3	2	1	3	3	2	3	3	3	3	3	3	3	3	3
9915	1	170	79.5	18	1	1	3	3	5	5	8	2	1	1	3	1	3	1	1	1	1	3	3	3	2	2	3	2	2	1	3	3	1	1	1	1	1	1	3	3	3	3	1	2	2	3	3	3	3
9509	2	157	50	18	1	0	3	5	5	4	7	3	2	3	2	3	4	3	1	1	3	2	2	2	2	2	2	2	2	2	2	2	2	2	2	2	2	2	2	2	2	2	2	2	2	2	2	2	2
7326	1	181	80	18	1	0	3	4	3	4	10	2	2	2	2	1	1	1	1	1	1	3	3	3	1	3	3	3	3	3	3	3	3	1	3	3	1	2	2	2	2	2	2	2	2	1	3	3	3
8440	2	160	47	18	1	0	3	5	4	5	7	2	2	2	3	1	4	1	3	1	3	3	3	3	1	3	3	3	3	1	3	3	3	3	3	2	1	2	3	3	3	3	1	3	3	3	3	3	3
7002	2	168	52	18	1	1	6	4	5	1	7	4	4	4	3	2	1	2	5	1	4	2	2	3	2	2	3	1	2	2	2	2	2	3	3	3	3	2	3	2	3	2	2	2	2	3	2	2	2
6927	2	162	75	18	1	1	5	4	5	1	8	4	4	4	2	4	2	5	2	1	3	3	3	3	1	1	3	2	3	2	1	2	3	2	1	3	1	3	1	3	3	3	2	3	3	3	3	3	3
8615	1	178	64	18	1	1	5	3	5	3	7	2	3	1	2	1	1	1	1	1	3	2	2	2	2	2	2	2	2	2	3	3	3	2	1	2	1	3	2	3	2	2	1	2	2	2	3	2	1
6940	1	180	56	18	1	1	5	3	5	3	7	3	2	2	3	1	1	1	1	1	2	3	3	3	1	3	3	3	3	1	3	3	1	3	3	3	3	3	3	3	3	3	1	1	1	3	3	3	3
8256	1	183	75	18	0	0	5	3	5	3	7	3	2	4	3	2	2	2	2	2	3	2	2	2	2	1	2	2	2	2	2	2	2	2	2	2	2	2	2	2	2	2	2	2	2	2	2	2	2
8079	2	163	60	18	1	1	6	4	5	4	4	1	2	3	2	1	1	1	1	1	4	2	2	2	2	2	2	2	2	2	2	2	2	2	2	2	1	3	3	2	2	2	1	2	2	3	1	2	2
10004	2	162	58	18	1	0	5	3	4	3	8	2	2	1	2	1	1	1	1	1	1	2	2	2	2	1	2	2	2	3	2	2	3	2	1	2	1	3	2	1	2	2	2	3	3	3	3	3	3
7960	1	185	70	18	1	1	5	4	4	2	8	3	2	4	2	3	3	3	3	3	3	2	2	2	2	2	2	2	2	2	2	2	2	2	2	2	2	2	2	2	2	2	2	2	2	2	2	2	2
10554	1	171	78	18	1	0	5	4	4	2	8	3	1	1	2	1	1	1	1	1	1	3	3	3	1	1	3	3	3	2	3	3	3	2	2	2	2	2	3	3	3	3	2	3	3	3	3	3	3
7475	2	159	49	18	1	0	5	4	4	2	8	3	2	2	2	1	2	1	3	1	5	3	2	3	1	1	3	2	3	2	2	3	1	1	2	3	2	3	3	3	2	2	1	2	2	3	2	3	3
7170	2	161	60	18	1	0	5	5	4	1	8	2	1	1	2	1	1	1	1	1	1	2	3	3	2	3	2	3	3	3	3	3	3	1	2	2	1	3	2	2	3	3	2	1	3	2	3	3	3
10025	2	172	68	18	1	1	5	4	4	3	7	3	3	3	3	1	1	1	1	1	1	3	2	2	2	2	2	2	2	2	2	2	2	2	2	2	2	2	2	3	3	2	2	2	3	2	2	2	2
7497	2	182	60	18	1	1	6	5	6	5	1	5	4	1	3	4	1	3	4	5	4	2	3	1	1	2	3	3	2	1	1	3	2	3	2	3	1	1	1	3	2	3	2	3	1	3	3	1	3
7553	1	175	120	18	1	1	5	4	5	4	5	2	4	3	2	3	3	3	3	3	2	2	2	2	2	2	2	2	2	2	2	2	2	2	2	2	2	2	2	2	2	2	2	2	2	2	2	2	2
9699	1	188	100	18	1	1	5	4	5	4	5	5	5	5	5	3	3	3	3	3	5	2	2	2	2	2	2	2	2	2	2	2	2	2	2	2	2	2	2	2	2	2	2	2	2	2	2	2	2
8568	1	170	80	18	1	1	5	4	5	4	5	2	2	3	3	1	1	2	3	1	4	3	2	3	1	1	3	2	1	2	2	1	3	3	3	3	1	3	1	2	2	2	1	1	2	2	1	1	1
8050	2	173	60	18	1	1	5	4	5	4	5	3	2	3	2	2	1	1	1	1	5	2	2	2	1	2	2	2	2	2	2	3	3	2	2	2	1	3	2	2	3	3	2	2	3	3	3	3	3
9227	2	165	58	18	1	1	5	4	5	4	5	3	3	4	3	2	2	2	2	1	3	2	3	3	1	1	2	2	3	2	2	3	2	2	2	1	1	3	3	3	3	2	2	3	3	3	3	3	1
8106	2	157	50	18	1	1	5	4	5	4	5	2	2	1	2	1	1	1	1	1	2	2	2	3	3	3	3	3	3	2	3	3	2	3	3	3	3	1	3	3	3	3	3	3	3	3	3	3	3
6978	2	164	64	18	1	0	5	4	5	4	5	3	2	3	3	2	2	2	2	1	1	3	3	3	2	1	3	3	2	2	2	2	3	3	3	3	1	3	3	2	3	3	1	2	2	2	2	2	2
8418	2	160	55	18	1	0	5	4	5	4	5	3	2	3	2	3	2	2	1	1	3	3	2	2	1	1	3	2	2	2	2	2	3	2	2	2	1	2	2	2	2	2	1	2	2	2	2	2	2
8417	2	168	53	18	0	0	5	4	5	4	5	2	1	2	3	1	1	1	1	1	1	3	3	3	2	2	3	3	3	2	3	3	2	3	3	3	2	3	3	2	3	2	1	3	3	3	3	3	2
9984	2	161	46	18	1	1	4	3	4	3	9	3	3	3	3	1	1	1	1	1	1	2	2	2	2	2	2	2	2	2	2	2	3	1	2	2	1	3	2	2	2	2	1	2	2	3	3	2	1
9772	2	167	90	18	0	0	4	3	4	3	9	1	1	3	3	2	2	2	2	1	1	3	3	3	2	2	2	2	2	2	2	2	3	2	2	2	1	2	2	2	2	2	2	2	2	2	2	2	2
7692	2	168	50	18	1	0	5	5	3	2	8	5	1	1	2	1	1	1	1	1	1	2	2	2	2	2	2	2	2	2	2	2	2	2	2	2	2	2	2	2	2	2	2	2	2	2	2	2	2
10622	1	166	50	18	1	0	5	5	3	2	8	2	2	2	2	2	1	1	1	1	1	3	3	3	1	2	2	2	2	3	2	3	3	2	1	3	1	3	2	1	2	3	2	2	3	3	3	3	2
6947	2	170	63	18	1	1	4	3	5	4	7	3	2	3	2	1	1	1	1	1	1	2	2	3	1	2	3	2	2	3	3	3	2	3	3	2	2	3	2	2	2	2	2	2	3	2	3	3	2
8294	1	180	90	18	1	0	4	3	5	4	7	3	2	3	2	2	2	2	2	1	2	2	2	2	2	2	2	2	2	2	2	2	2	2	2	2	1	3	1	1	2	2	1	2	2	2	2	2	2
10567	1	183	85	18	0	1	5	4	4	4	6	2	2	2	2	2	3	2	1	1	1	2	2	2	2	2	2	2	2	2	2	2	3	2	1	1	1	3	3	2	2	2	1	2	3	2	2	2	2
10476	2	158	48	18	1	1	5	4	4	4	6	3	3	4	2	1	1	1	1	1	3	1	2	2	2	2	2	2	2	2	2	2	2	2	2	2	2	2	2	2	2	2	2	2	2	2	2	2	2
8896	1	168	58	18	1	1	4	4	3	2	10	3	3	3	3	3	3	3	3	1	3	2	2	2	2	2	2	2	2	2	2	2	2	2	2	2	1	3	1	3	1	2	1	1	1	2	2	2	1
8425	1	178	70	18	1	0	4	3	4	4	8	2	2	1	2	1	1	1	1	1	1	3	3	3	1	2	2	2	2	3	2	2	1	3	2	1	1	3	3	2	2	1	1	2	2	3	3	3	3
6807	2	158	56	18	1	1	4	5	3	1	10	3	3	2	2	5	1	5	2	1	5	3	3	3	1	3	3	3	3	1	3	3	2	3	3	3	1	2	3	3	3	2	1	3	3	3	3	3	3
11220	1	180	67	18	1	1	4	4	4	3	8	4	4	5	2	1	1	3	1	1	3	2	2	3	2	2	3	2	3	2	2	3	3	2	3	2	2	2	2	2	3	2	2	2	3	2	2	2	2
10002	1	172	66	18	1	1	4	4	4	3	8	3	2	2	2	2	2	1	2	1	3	2	3	3	1	3	3	3	3	2	3	3	3	3	3	3	3	2	3	3	3	3	3	3	3	3	3	3	3
8238	1	171	63	18	1	1	4	4	4	3	8	2	3	2	2	1	1	1	1	1	3	1	2	3	2	1	2	2	2	2	2	2	3	2	2	2	1	2	2	2	2	2	2	2	2	2	2	2	2
7233	1	172	58	18	1	1	4	4	4	3	8	2	2	3	2	3	1	1	1	1	2	2	2	2	2	2	2	2	2	2	2	2	2	2	2	2	2	2	2	2	2	2	2	2	2	2	2	2	2
8717	2	163	80	18	0	0	4	4	4	3	8	2	3	3	2	1	1	1	1	1	3	1	1	1	2	1	1	1	1	2	2	1	3	1	1	1	1	3	1	1	1	1	1	1	1	1	1	1	1
11265	1	178	85	18	1	1	4	4	5	4	6	3	3	3	3	3	3	3	3	3	1	2	2	2	2	2	2	2	2	2	2	2	2	2	2	2	2	2	2	2	2	2	2	2	2	2	2	2	2
7664	1	187	65	18	1	1	4	4	5	4	6	1	1	3	3	1	1	2	2	1	3	2	2	2	1	1	2	2	2	2	2	2	2	2	1	2	1	2	2	2	2	2	1	1	2	2	1	2	1
8699	1	186	150	18	1	1	4	4	4	4	7	4	3	3	2	3	3	2	1	1	3	2	3	3	1	2	3	2	3	2	2	3	3	2	2	3	1	2	3	2	3	3	2	1	3	3	3	3	2
7296	2	163	110	18	1	1	4	4	4	4	7	3	1	3	3	1	4	4	1	1	2	2	2	3	1	1	3	2	2	2	2	2	3	2	2	1	1	3	2	2	2	3	2	2	1	2	2	2	2
7515	1	181	90	18	0	1	4	4	4	4	7	2	1	1	2	1	1	1	1	1	1	3	3	3	2	3	3	3	3	2	3	3	3	2	2	1	1	2	3	2	2	3	2	3	3	3	3	3	3
10745	1	187	79	18	1	1	4	4	4	4	7	1	1	1	1	3	3	3	3	3	1	2	2	2	2	2	2	2	2	2	2	2	2	2	2	2	2	2	2	2	2	2	2	2	2	2	2	2	2
8011	1	175.6	65	18	0	1	4	4	4	4	7	3	2	2	3	2	3	1	1	1	3	2	3	3	2	2	3	2	3	2	2	3	3	2	1	2	1	2	2	3	3	3	1	2	3	3	3	3	3
8783	2	163	55	18	1	1	4	4	4	4	7	2	2	3	3	2	2	2	1	1	2	2	2	2	2	2	2	2	1	3	3	2	3	2	2	2	1	3	2	1	2	3	1	2	3	3	2	3	2
8236	2	164	44	18	0	1	4	4	4	4	7	4	2	3	3	1	1	1	1	1	1	3	3	3	1	3	3	2	2	3	2	3	3	2	3	2	1	3	2	2	3	2	1	2	3	2	2	2	3
8138	1	176	80	18	1	0	4	4	4	4	7	3	3	3	2	2	2	3	2	1	4	3	3	3	1	2	3	3	3	1	3	3	3	1	1	1	1	3	3	2	3	3	1	3	3	2	3	3	3
10570	2	173	58	18	1	0	4	4	4	4	7	2	1	1	2	1	1	1	1	1	1	3	3	3	2	2	2	2	3	1	3	3	3	2	2	2	1	2	2	2	2	3	3	3	3	3	3	3	3
7180	2	164	47	18	1	0	4	4	4	4	7	4	2	3	2	2	5	2	3	1	3	3	3	3	1	2	3	2	3	1	3	2	1	2	2	3	3	3	3	3	2	2	2	2	2	3	2	3	3
6962	1	168	139	18	1	1	4	5	4	3	7	2	2	1	2	2	1	1	2	1	2	2	3	3	2	3	2	2	3	3	3	3	3	2	2	2	1	2	2	2	2	3	2	2	3	2	2	2	2
7437	2	170.4	73	18	1	1	4	5	4	4	6	2	2	1	2	2	1	1	1	1	1	2	2	3	2	2	3	3	2	1	3	3	2	3	3	3	1	3	2	3	3	3	2	3	3	3	3	3	2
9529	1	180	65	18	1	0	5	1	5	1	10	5	5	5	1	1	1	1	5	1	2	1	1	1	3	3	3	3	2	3	3	3	3	2	2	2	2	2	2	2	2	2	2	2	2	2	2	2	2
9504	1	178	80	18	1	1	5	2	5	2	8	1	2	1	2	3	1	1	1	1	3	3	3	3	1	3	3	3	3	1	3	3	1	3	3	3	3	1	3	3	3	3	3	3	3	3	3	3	3
7200	2	175	80	18	1	1	5	2	5	2	8	2	1	2	2	2	1	1	2	1	1	2	3	3	3	1	3	3	2	3	3	3	3	3	3	3	3	3	3	1	2	3	2	3	3	3	3	3	3
7763	2	159	57	18	1	1	5	2	5	2	8	2	2	3	2	1	1	1	1	1	2	2	2	2	2	2	2	2	3	2	3	2	3	2	2	2	1	3	2	1	2	3	2	2	2	2	2	3	2
8155	1	171.2	100	18	1	0	5	1	5	4	7	1	5	5	2	5	1	1	1	1	1	3	3	3	1	3	3	3	3	1	3	3	1	3	3	3	3	1	3	3	3	3	3	3	3	3	3	3	3
8420	2	168	51	18	1	0	5	3	3	1	10	2	1	3	2	3	1	1	1	1	1	3	3	3	3	3	3	3	3	1	3	3	3	3	3	2	1	3	3	2	2	3	1	1	3	2	3	3	1
7514	2	162	48	18	1	0	5	3	4	3	7	3	3	4	3	3	3	2	3	1	5	3	3	3	2	1	2	2	2	3	3	3	3	2	1	2	1	2	2	3	2	2	1	3	3	3	3	3	2
6971	1	180	95	18	1	1	5	3	5	4	5	5	5	4	1	5	5	5	5	2	5	3	3	3	2	3	3	3	3	1	3	3	3	3	3	3	2	2	3	3	3	3	3	3	3	3	3	3	2
9364	1	182	90	18	1	1	5	3	5	4	5	2	3	3	2	4	4	3	4	2	4	3	2	2	2	3	2	2	1	2	3	2	3	3	1	3	1	2	3	1	2	2	1	2	2	2	2	3	2
8470	2	172	56	18	1	1	4	2	4	3	9	2	1	1	2	1	1	2	1	1	3	2	2	2	2	3	2	2	2	2	3	2	2	2	1	3	1	3	2	2	3	3	1	2	2	3	2	2	1
9727	1	176	65	18	1	1	5	3	3	3	8	2	2	2	2	2	2	2	2	2	2	2	2	2	2	2	2	2	2	2	2	2	2	2	2	2	2	2	2	2	2	2	2	2	2	2	2	2	2
9584	1	185	65	18	0	1	4	3	4	2	9	1	1	2	2	1	1	1	1	1	1	2	3	3	2	2	3	3	2	2	2	2	3	3	3	3	1	2	3	3	3	2	2	3	3	2	3	3	3
6872	1	180	50	18	1	1	4	2	5	4	7	2	2	2	2	1	1	1	1	1	3	2	2	2	2	2	2	2	2	2	2	2	2	2	2	2	2	2	2	2	2	3	2	2	2	2	2	2	2
7774	2	170	60	18	1	1	4	3	5	3	7	2	1	1	2	1	1	1	1	1	4	3	3	2	1	3	3	3	3	1	3	3	3	2	1	1	1	2	2	2	2	3	2	3	3	3	3	3	1
7897	1	172	75	18	1	1	5	4	4	3	6	2	2	2	1	1	1	1	1	1	1	2	2	2	2	2	2	2	2	2	2	2	2	2	2	2	2	2	2	2	2	2	2	2	2	2	2	2	2
9080	1	183	87	18	1	1	5	4	5	4	4	3	2	4	3	1	1	1	1	1	5	2	3	2	2	1	2	3	3	1	3	2	2	2	2	3	1	2	1	2	3	2	1	2	2	3	2	3	2
8677	2	159	58	18	1	1	4	2	4	4	8	4	4	3	3	4	3	4	1	4	5	2	3	3	2	3	3	3	3	1	3	3	2	3	3	3	3	2	3	2	3	3	3	3	3	3	3	3	2
7540	1	190	100	18	0	1	4	3	4	3	8	3	2	1	2	3	3	3	3	3	5	2	1	2	2	1	3	2	1	2	3	2	3	3	2	3	2	3	2	1	2	3	2	1	3	2	1	2	3
9355	2	165	65	18	1	1	4	3	4	3	8	2	1	3	3	1	1	1	1	1	1	2	3	3	1	1	3	2	3	1	3	3	1	3	3	3	3	3	3	2	3	3	1	3	3	3	3	3	3
10607	1	170	55	18	1	1	4	3	4	3	8	2	2	2	3	2	2	2	1	1	1	2	2	2	2	1	2	3	3	2	2	3	2	1	1	2	1	3	2	2	2	2	1	1	2	2	3	2	3
9833	1	178	80	18	1	1	4	4	4	2	8	3	2	2	2	1	2	1	1	1	5	2	2	2	2	2	2	2	2	2	2	2	2	2	2	2	2	2	2	2	2	2	2	2	2	2	2	2	2
9361	1	170	65	18	1	1	4	3	5	4	6	2	2	5	3	1	1	1	1	1	1	3	3	3	1	2	2	2	2	2	2	2	2	2	1	2	3	2	2	2	2	2	2	3	3	3	3	3	1
8488	2	168	47	18	0	1	5	4	4	4	5	3	2	4	3	2	2	2	1	1	3	2	2	2	2	1	2	2	2	2	2	2	2	2	1	2	1	3	2	2	2	2	1	1	1	1	2	2	2
9810	2	169	60	18	1	0	5	5	5	4	3	2	1	1	2	1	1	1	1	1	1	3	3	3	2	2	2	2	2	2	2	2	2	2	2	2	2	2	2	2	2	2	2	2	2	2	2	2	2
8735	2	160	60	18	1	1	4	4	4	3	7	2	1	4	2	1	1	1	1	1	1	3	3	3	1	3	3	3	3	1	3	3	3	3	1	2	1	2	2	2	2	3	1	1	3	3	3	3	3
8441	2	164	51	18	1	1	4	4	4	3	7	3	3	2	2	2	2	2	1	1	3	2	3	3	2	2	3	2	2	2	3	3	2	2	2	2	1	3	2	2	2	2	2	3	2	2	2	2	2
7382	1	165	50	18	1	1	4	4	5	4	5	5	1	1	1	3	3	3	1	1	1	2	2	2	2	2	2	2	2	2	2	2	2	2	2	2	2	2	2	2	2	2	2	2	2	2	2	2	2
10829	2	173	68	18	1	0	3	3	4	3	9	2	1	3	2	1	2	2	2	1	5	2	3	2	2	3	3	2	2	2	2	3	2	2	3	3	2	3	3	3	3	2	3	3	3	3	3	3	3
8930	1	177	72	18	0	0	4	4	4	4	6	3	2	4	3	1	1	1	1	1	2	3	3	3	2	2	3	3	3	1	3	3	2	2	2	2	1	2	2	2	2	2	1	2	3	2	2	3	2
7435	1	190	220	18	1	0	3	3	4	4	8	2	1	2	3	1	1	1	1	1	3	2	3	3	2	2	2	2	2	2	2	2	3	2	2	2	2	2	2	2	2	2	2	2	2	2	2	2	2
8020	2	169	70	18	0	0	3	3	4	4	8	2	2	2	2	1	1	1	1	1	1	2	2	3	1	3	3	3	3	3	2	3	3	2	3	1	1	3	2	1	1	2	1	2	2	2	2	2	2
8178	1	179	94	18	1	0	3	5	3	1	10	2	1	2	2	1	1	1	1	1	3	2	3	3	2	2	2	2	2	2	3	3	3	2	2	2	1	3	2	2	3	3	3	2	2	2	2	2	2
7183	1	177	80	18	1	1	3	4	5	4	6	3	3	3	2	4	3	4	4	3	2	2	3	3	2	2	2	3	2	2	2	2	2	2	2	2	2	2	2	2	2	2	2	2	2	2	2	2	2
8618	1	170	50	18	1	0	3	4	5	4	6	3	3	4	2	2	3	5	2	2	3	1	2	2	3	2	1	2	1	2	1	2	3	2	3	1	2	2	1	3	1	2	1	1	2	3	1	3	2
6870	1	185	96	18	1	1	4	5	4	4	5	2	1	4	2	1	1	1	1	1	5	3	3	3	1	3	3	3	3	1	3	3	1	1	3	3	3	3	1	3	3	3	1	3	3	3	3	3	3
7144	2	164	60	18	0	0	4	5	4	4	5	4	3	3	2	1	1	2	2	1	1	2	2	2	2	2	2	2	2	2	2	2	2	2	2	2	2	2	2	2	2	2	2	2	2	2	2	2	2
6968	1	177	62	18	1	1	3	3	3	4	9	2	1	1	3	1	1	1	1	1	1	1	1	1	3	3	3	3	3	1	3	3	1	3	3	3	3	1	3	3	3	3	3	3	3	3	3	3	3
8176	1	172	130	18	1	1	3	3	4	5	7	2	1	2	1	2	2	2	2	2	1	2	2	2	2	2	1	2	2	2	1	2	2	2	1	2	2	2	2	1	2	2	1	2	2	3	1	2	2
8958	1	175	50	18	1	1	4	5	4	5	4	2	2	3	2	1	3	1	5	1	1	2	2	2	2	2	2	2	2	2	2	2	2	2	2	2	2	2	2	2	2	2	2	2	2	2	2	2	2
11175	2	168	62	18	1	1	6	3	5	1	6	3	3	2	2	1	2	2	2	1	4	2	2	3	1	2	3	3	2	3	2	2	2	2	2	2	1	2	2	1	2	1	1	1	2	2	2	2	1
6967	2	168	70	18	1	1	5	2	5	2	7	1	1	1	1	3	2	2	1	1	3	2	3	3	3	2	3	3	3	3	3	3	3	2	3	2	2	3	3	3	2	2	2	3	3	3	3	3	2
9455	2	153	49	18	0	0	5	1	5	4	6	4	2	3	2	1	1	2	2	1	3	2	1	2	3	2	1	2	3	2	3	3	3	2	2	1	1	2	1	2	3	2	1	1	2	3	2	2	1
7614	1	175	140	18	1	0	6	5	5	1	4	3	3	2	2	2	2	2	2	2	3	2	2	2	2	2	2	2	2	2	2	2	2	2	2	2	2	2	2	2	2	2	2	2	2	2	2	2	2
7029	2	170	62	18	1	1	5	2	5	3	6	3	3	3	2	3	1	4	1	1	5	2	3	3	2	3	3	3	3	1	3	3	3	3	3	3	2	2	3	3	3	3	3	3	3	3	3	3	3
10282	1	174	53	18	1	0	5	2	4	3	7	4	4	5	2	1	1	1	1	1	5	3	3	3	1	3	3	3	3	1	3	3	1	3	3	3	3	1	3	3	3	3	3	3	3	3	3	3	3
10223	1	178	65	18	1	1	5	1	5	5	5	1	2	1	1	1	1	1	1	1	1	1	3	3	1	3	3	3	3	2	2	2	3	1	1	1	1	3	2	2	2	3	1	2	2	3	3	3	3
9643	2	169	60	18	0	0	5	2	5	4	5	3	2	3	2	2	1	1	1	1	2	2	3	3	1	3	3	3	2	2	3	3	3	2	1	2	1	2	2	1	2	2	2	2	3	2	2	3	1
7928	1	176	80	18	1	1	5	4	4	1	7	2	2	2	2	3	3	3	3	3	2	2	2	2	2	2	2	2	2	2	2	2	2	2	2	2	2	2	2	2	2	2	2	2	2	2	2	2	2
7449	1	183	104	18	1	1	5	3	5	3	5	2	4	1	2	1	1	1	1	1	1	2	2	2	2	1	2	3	3	2	3	3	3	2	2	2	1	3	3	1	3	3	2	2	3	2	2	2	2
7659	1	180	63	18	1	1	5	3	5	3	5	2	3	3	3	1	1	1	1	1	1	1	1	1	3	1	3	3	3	3	3	1	3	1	3	3	1	3	3	3	1	3	2	2	2	2	2	2	2
9558	1	172	57	18	1	1	5	3	5	3	5	3	2	2	2	1	1	1	1	1	3	2	2	2	2	2	2	2	2	2	2	2	2	2	2	2	2	2	2	2	2	2	2	2	2	2	2	2	2
7129	2	168	50	18	1	1	4	2	4	2	9	2	1	2	2	1	1	1	1	1	4	3	3	3	1	2	3	3	2	2	2	2	3	3	3	3	1	3	3	3	3	3	3	3	3	1	2	3	3
9527	2	164	58	18	1	1	4	1	5	4	7	2	2	3	2	1	1	1	1	1	1	3	3	3	1	3	3	2	2	2	3	3	3	2	2	2	1	2	2	2	2	3	2	3	3	2	3	3	3
7333	2	175	100	18	1	1	5	3	4	3	6	2	1	2	3	1	1	1	1	1	1	3	3	3	2	2	2	3	3	2	2	2	3	2	1	1	1	2	3	2	2	3	2	1	2	2	2	2	2
8119	1	176	90	18	1	1	5	3	4	3	6	3	4	1	2	1	1	1	1	1	1	3	3	3	1	3	3	3	3	1	3	3	1	3	3	3	3	2	3	2	3	3	2	3	3	2	3	3	2
9944	2	171	55	18	1	1	5	3	4	3	6	3	2	3	2	2	1	1	1	1	5	2	2	2	2	2	2	2	2	2	2	2	2	2	3	3	2	2	2	2	2	2	1	2	2	2	2	2	2
7543	1	185	130	18	1	1	4	3	5	2	7	3	1	1	2	1	1	5	1	1	1	3	3	3	2	1	3	3	3	3	3	3	2	2	1	3	3	1	3	3	3	2	3	3	3	3	3	3	3
9918	2	163	45	18	1	1	5	5	4	1	6	2	2	1	2	1	1	3	2	1	3	2	2	3	3	1	3	2	2	2	3	2	2	2	2	3	1	3	2	1	3	2	3	2	2	3	2	2	2
8386	1	180	70	18	1	1	4	2	4	3	8	3	3	2	2	1	1	1	1	1	1	3	3	3	1	3	3	3	3	1	3	3	2	3	3	3	1	3	3	3	3	3	3	3	3	3	3	3	3
8335	1	176	64	18	1	1	4	2	4	3	8	2	4	5	3	2	4	2	3	1	5	2	2	3	2	3	3	3	2	1	2	3	2	2	1	2	1	2	2	3	3	3	1	1	2	2	2	3	3
7409	1	178	78	18	1	1	5	4	3	2	7	3	2	3	2	4	1	1	1	1	1	2	3	3	1	2	2	3	3	2	3	3	2	3	3	3	1	2	2	2	2	3	1	2	2	3	3	3	3
7963	1	170	50	18	1	0	5	4	3	2	7	1	3	4	2	5	4	5	1	1	5	2	2	3	2	2	2	2	2	2	2	2	2	2	2	2	2	2	2	2	2	2	2	2	2	2	2	2	2
8253	2	155	46	18	0	0	5	5	4	2	5	2	1	1	3	1	1	1	1	1	1	3	3	3	1	3	3	3	3	1	3	3	3	2	2	2	1	3	2	2	2	2	2	2	3	2	3	3	2
9545	2	160	50	18	0	0	3	1	5	4	8	3	4	2	2	1	1	1	2	1	3	3	3	3	2	1	1	2	3	2	3	3	2	2	2	2	1	3	3	2	2	3	2	3	3	2	3	3	3
7136	2	172	70	18	1	1	4	3	4	3	7	3	3	3	3	3	1	1	1	1	3	2	2	2	2	2	2	2	2	2	2	2	1	2	2	2	2	2	2	2	2	2	2	2	2	2	2	2	2
7985	2	170	55	18	1	1	4	3	4	3	7	2	1	1	2	1	1	1	1	1	1	3	3	3	1	3	3	3	3	3	3	3	3	2	3	1	1	3	3	1	3	3	3	3	3	3	3	3	3
8114	2	164	50	18	1	1	4	3	4	3	7	2	1	2	2	1	1	1	1	1	3	2	2	2	2	2	3	2	3	2	2	3	3	2	3	1	1	2	2	3	2	3	1	2	3	3	2	3	3
10014	2	157	58	18	1	0	4	3	4	3	7	3	2	3	3	2	1	1	1	1	1	2	2	2	2	2	3	2	2	2	2	2	2	2	3	2	2	2	2	2	2	1	1	1	2	2	2	2	2
9523	2	168	50	18	0	0	5	4	3	3	6	4	2	3	2	3	3	3	3	3	3	2	2	2	2	2	2	2	2	2	2	2	2	2	2	2	2	2	2	2	2	2	2	2	2	2	2	2	2
8450	2	160	45	18	1	0	5	4	4	4	4	2	3	2	3	3	3	4	3	3	2	2	2	2	1	2	2	2	2	2	2	2	2	2	2	2	2	2	2	2	2	2	2	2	2	2	2	2	2
9167	2	161	60	18	1	1	4	3	3	3	8	3	2	3	3	3	2	2	2	1	2	2	2	2	2	2	2	2	2	2	2	2	2	2	2	2	2	2	2	2	2	2	2	2	2	2	2	2	2
8900	1	168	50	18	1	1	4	3	3	3	8	2	1	1	2	1	1	1	1	1	3	3	3	3	2	2	3	3	3	3	3	3	3	2	2	2	1	3	2	2	2	3	2	2	2	2	3	2	2
7185	2	161	114	18	1	1	4	4	3	2	8	2	1	5	3	1	2	1	2	1	1	2	3	3	1	1	3	3	3	2	3	3	3	1	1	3	1	3	2	3	3	3	2	1	3	2	3	3	1
10825	1	169	58	18	1	0	3	2	5	4	7	3	3	2	3	1	1	1	1	1	5	2	3	3	2	3	1	3	3	2	3	3	2	2	3	3	1	3	3	2	3	3	1	2	3	2	3	3	1
7703	1	167	65	18	0	0	4	3	2	3	9	3	1	3	2	1	1	1	1	1	5	2	2	3	1	1	2	3	3	2	3	3	2	2	3	3	2	2	2	2	2	2	1	2	3	3	2	3	2
10819	1	165	116	18	1	0	4	4	5	4	4	3	1	2	2	1	1	3	1	1	1	1	1	3	1	1	2	2	2	2	2	2	3	2	1	2	1	3	2	2	2	2	3	2	2	2	2	2	1
7972	1	178	70	18	1	1	5	5	5	5	1	2	1	4	3	3	2	2	4	4	2	3	3	3	1	3	3	3	3	1	3	3	1	3	3	3	3	1	3	3	3	3	3	3	3	3	3	3	3
10148	1	175	76	18	1	1	4	4	4	4	5	3	2	2	2	2	2	2	2	2	5	2	2	2	2	2	2	2	2	2	2	2	2	2	2	2	2	2	2	2	2	2	2	2	2	2	2	2	2
9469	1	183	60	18	1	1	4	4	4	4	5	2	1	2	2	1	1	1	1	1	1	2	3	3	2	2	3	3	3	2	3	3	1	3	3	2	3	3	3	3	3	3	2	3	3	2	3	3	3
7701	2	160	60	18	0	1	3	3	3	3	9	2	2	1	2	1	1	1	1	1	3	2	2	2	2	2	2	2	2	2	3	3	3	1	1	1	1	2	2	2	1	2	1	2	2	2	2	2	2
8382	2	155	40	18	0	0	3	3	3	3	9	3	3	1	2	2	1	1	1	1	3	3	3	3	2	2	3	2	2	1	2	3	2	3	2	3	1	2	3	3	2	3	1	3	3	3	3	3	3
10081	2	169	65	18	1	1	2	3	4	3	9	2	3	2	2	1	1	1	1	1	3	1	2	2	2	1	3	2	3	3	3	3	3	1	3	3	1	2	3	3	2	3	1	1	3	3	1	3	3
8363	2	168	70	18	1	1	3	5	3	3	7	2	1	1	2	1	1	1	1	1	2	3	3	3	1	1	3	3	3	3	3	3	3	1	1	1	1	3	3	3	3	3	1	3	3	3	3	3	3
8716	1	171	60	18	0	1	2	4	3	4	8	3	2	3	2	1	2	1	1	1	3	2	2	2	2	2	2	2	2	2	2	2	3	1	1	2	1	2	1	2	2	2	1	2	3	2	2	2	2
9278	1	170	85	18	1	1	5	2	5	1	7	2	2	3	2	1	1	1	1	1	1	2	2	2	2	2	2	2	2	2	2	2	2	2	2	2	2	2	2	2	2	2	2	2	2	2	2	2	2
9948	2	170	155	18	1	0	5	3	5	1	6	2	4	3	2	2	3	3	1	1	1	2	2	2	2	1	2	2	2	2	2	2	3	1	2	2	1	3	1	2	2	2	1	2	2	2	1	2	2
9337	1	180	80	18	1	1	5	2	4	2	7	2	1	1	2	1	1	1	1	1	1	2	2	2	2	2	2	2	2	2	2	3	3	2	3	1	1	2	2	1	1	3	2	3	3	3	3	3	3
7331	2	170	104	18	1	1	5	2	5	3	5	2	1	1	2	1	1	1	1	1	1	3	3	3	2	3	3	3	3	3	3	3	3	1	3	1	1	3	1	1	2	3	3	2	3	2	3	3	3
10375	2	161	64	18	1	1	5	2	4	3	6	3	2	2	2	1	1	1	1	1	1	2	2	3	2	2	2	2	3	2	2	2	3	2	1	2	1	2	1	2	3	2	2	2	3	3	3	3	2
10466	1	170	53	18	1	0	5	3	5	3	4	1	1	5	1	1	1	1	1	1	1	2	2	2	1	1	3	3	3	3	1	1	3	1	3	1	3	3	1	3	1	1	1	3	1	1	1	1	1
8118	1	173	200	18	0	1	4	1	4	3	8	3	3	3	3	3	3	3	3	3	3	2	2	2	2	2	2	2	2	2	2	2	2	2	2	2	2	2	2	2	2	2	2	2	2	2	2	2	2
7063	2	176	70	18	1	1	4	2	4	2	8	3	1	2	2	1	1	1	1	1	3	2	2	2	2	2	2	2	2	2	2	2	2	2	2	2	1	3	2	2	2	2	2	3	2	2	2	2	2
9021	1	172	64	18	0	1	4	2	4	2	8	1	2	3	3	2	2	2	2	2	3	2	2	2	2	2	2	2	2	2	2	2	2	2	2	2	2	2	2	2	2	2	2	2	2	2	2	2	2
8328	1	175	62	18	0	1	4	2	4	2	8	3	2	3	2	1	1	1	1	1	1	2	2	2	3	2	2	2	2	2	2	2	2	2	2	2	2	2	2	2	2	2	2	2	2	2	2	2	2
7210	1	167	62	18	1	1	4	2	4	2	8	3	2	3	2	1	1	1	1	1	1	2	2	2	2	2	2	2	2	2	2	2	2	2	2	2	2	2	2	2	2	2	2	2	2	2	2	2	2
6841	1	182	56	18	1	1	4	2	4	2	8	2	2	2	2	1	1	1	1	1	1	1	1	1	3	1	1	1	1	3	1	1	3	1	1	1	1	3	1	1	1	1	1	1	1	1	1	1	1
8318	2	163	56	18	1	1	4	2	4	2	8	2	1	1	2	2	2	2	2	1	1	2	2	2	2	2	2	2	2	2	2	2	2	2	1	2	1	2	2	1	2	2	2	2	2	2	2	1	2
6945	2	168	49	18	0	1	4	2	4	2	8	2	2	2	2	1	1	1	1	1	1	2	2	2	2	2	2	2	2	2	2	2	3	2	3	2	1	2	3	3	3	3	2	3	3	3	3	3	3
9144	1	175.3	173.9	18	1	0	4	2	4	2	8	3	2	3	3	1	1	2	1	1	1	2	2	3	3	1	2	2	3	2	3	3	3	2	2	2	1	2	3	3	3	2	3	2	3	3	3	3	1
9561	1	195	140	18	1	1	4	3	4	1	8	3	2	2	2	2	2	2	2	1	3	2	2	2	2	2	2	2	2	2	2	2	2	2	2	2	2	2	2	2	2	2	2	2	2	2	2	2	2
9492	2	167	53	18	1	1	5	4	3	1	7	2	1	1	2	1	1	1	1	1	3	2	2	3	3	1	2	3	3	3	3	3	3	2	1	1	1	3	2	2	2	3	2	2	2	2	3	3	1
9885	1	175	77	18	1	1	4	2	3	2	9	3	2	2	2	3	3	3	3	3	2	3	2	2	2	3	2	3	2	1	3	3	2	3	2	3	2	2	3	3	3	3	3	3	3	3	3	3	3
8554	1	185	75	18	0	1	4	2	3	2	9	3	3	1	3	3	3	3	1	1	3	3	3	3	3	3	3	3	3	2	3	3	3	3	3	3	1	3	1	3	3	3	3	3	3	3	3	3	3
7105	1	175	55	18	1	0	4	2	4	3	7	2	1	2	2	2	1	1	1	1	1	2	2	2	2	2	2	2	2	2	2	2	2	2	2	2	2	2	2	2	2	2	2	2	2	2	2	2	2
10578	1	170	85	18	1	1	5	4	3	2	6	5	1	1	2	1	1	1	1	1	1	3	3	3	1	3	3	3	3	1	3	3	3	3	3	3	3	1	3	3	3	3	3	3	3	3	3	3	3
7591	1	169	72	18	1	1	4	2	5	4	5	3	2	3	3	3	3	2	2	1	3	2	2	2	2	2	2	2	2	2	2	2	3	2	2	2	2	2	1	2	2	2	1	2	2	2	2	2	2
7827	2	158	49	18	1	1	4	4	4	1	7	3	2	3	3	3	2	2	2	1	5	2	2	3	1	2	2	2	2	1	2	2	2	2	3	2	2	3	2	3	2	2	1	2	2	2	2	2	1
7079	1	170	75	18	1	0	4	4	4	1	7	2	2	1	2	1	1	1	1	1	2	2	2	2	2	2	2	2	2	2	2	2	2	2	2	2	2	2	2	2	2	2	2	2	2	2	2	2	2
9125	1	175	52	18	1	0	4	4	4	1	7	3	2	3	2	1	3	2	1	1	3	3	2	3	2	3	2	3	3	1	3	3	2	3	1	3	1	2	2	3	3	3	3	3	3	2	3	3	3
9742	2	158	45	18	1	1	4	3	3	2	8	2	1	4	2	1	3	3	2	1	3	1	3	3	3	3	3	3	3	3	2	3	3	1	1	1	2	2	2	2	2	2	1	1	2	2	2	2	3
7195	2	158	60	18	1	1	4	3	4	3	6	2	2	2	2	2	2	4	2	1	3	2	2	2	2	1	2	2	2	2	2	2	3	2	2	2	2	3	2	2	2	2	1	2	2	2	2	2	1
7421	2	170	53	18	1	1	4	3	4	3	6	3	2	3	2	2	1	3	1	1	5	2	2	2	2	1	2	2	3	2	2	2	3	1	1	2	1	3	2	2	2	2	2	2	2	2	1	2	1
10742	1	172	50	18	1	1	4	3	4	3	6	2	3	3	2	3	4	1	3	2	2	1	1	1	2	2	1	2	1	2	1	2	3	2	1	2	1	2	1	2	1	2	1	2	1	2	1	2	1
6973	2	163	58	18	0	0	4	3	4	3	6	3	3	3	2	1	1	1	1	1	4	1	2	3	1	1	3	3	2	1	3	3	3	1	1	3	2	3	2	2	1	2	1	1	3	3	1	3	1
7386	2	158	55	18	0	0	4	3	4	3	6	2	1	1	3	1	1	1	1	1	1	2	2	2	2	2	2	2	2	2	2	2	2	2	2	2	2	2	2	2	2	2	2	2	2	2	2	2	2
7354	1	170	50	18	0	0	4	3	4	3	6	3	3	3	2	3	2	4	1	1	3	2	2	2	2	2	2	2	2	2	2	2	2	2	2	2	2	3	2	3	2	2	2	2	2	2	2	2	2
10643	1	180	65	18	0	1	3	2	3	2	10	2	2	2	4	5	4	3	4	4	2	2	2	2	1	3	3	3	2	2	2	3	1	3	2	3	3	1	2	3	3	3	3	2	1	2	3	2	2
8647	2	162	53	18	1	0	3	2	3	2	10	2	2	2	2	1	1	1	1	1	3	2	2	2	2	2	2	2	2	2	2	2	2	2	2	2	2	2	2	2	2	2	2	2	2	2	2	2	2
8211	2	157	46	18	0	0	3	2	3	2	10	2	2	1	3	3	4	3	2	4	2	2	3	2	2	2	2	3	1	2	2	3	2	2	3	3	2	2	3	2	2	2	2	3	1	2	2	1	3
10430	1	178	80	18	1	0	3	3	3	1	10	3	4	4	3	4	2	1	1	1	3	2	3	2	3	1	2	3	3	2	3	3	3	3	2	2	1	3	3	3	1	3	2	3	3	3	3	3	3
10573	1	168	90	18	1	1	3	2	4	3	8	2	1	1	2	1	1	1	1	1	1	2	2	2	2	2	2	2	2	2	2	2	2	3	2	2	2	2	3	2	2	2	1	2	2	2	2	2	1
7822	2	164	54	18	0	1	3	2	4	3	8	3	4	3	2	3	3	2	2	1	3	2	2	2	2	2	2	2	2	2	2	2	2	2	2	2	2	2	2	2	2	2	2	2	2	2	2	2	2
8873	1	182	85	18	1	0	3	2	4	3	8	3	2	4	3	2	1	1	1	1	3	2	2	3	2	2	3	3	3	1	3	3	2	1	3	2	1	1	1	3	3	3	2	2	3	3	3	3	2
9569	2	166	57	18	1	1	4	4	3	2	7	2	1	1	2	1	2	2	2	1	5	2	2	2	2	3	3	3	2	2	3	3	2	2	3	2	2	2	2	2	3	3	2	3	3	3	3	3	3
9161	2	160	58	18	0	0	4	4	3	2	7	2	3	3	3	1	1	1	1	1	1	3	3	3	1	3	3	3	3	1	3	3	3	3	3	3	1	3	2	2	2	3	3	3	3	3	3	3	1
7619	1	180	85	18	1	1	4	3	4	4	5	3	1	3	3	5	1	3	1	1	5	3	3	3	2	1	3	3	3	2	3	3	3	3	3	3	1	2	3	3	3	3	2	2	3	3	3	3	2
10436	2	170	110	18	1	0	3	3	5	3	6	1	1	1	2	2	2	2	2	2	1	2	2	2	2	2	2	2	2	2	2	2	2	2	2	2	2	2	2	2	2	2	2	2	2	2	2	2	2
8035	1	177.5	62	18	0	0	3	2	3	3	9	2	1	1	2	1	1	1	1	1	2	2	2	2	2	2	2	2	2	3	2	2	3	1	2	2	1	3	2	1	2	2	1	1	2	2	2	2	1
8126	1	176	69	18	1	1	3	2	4	4	7	3	3	3	3	3	3	3	3	3	3	2	2	2	2	2	2	2	2	2	2	2	2	2	2	2	2	2	2	2	2	2	2	2	2	2	2	2	2
6964	2	172	65	18	1	1	3	2	4	4	7	2	2	2	2	1	5	1	5	1	5	1	2	2	3	2	1	3	3	2	2	2	2	1	1	2	1	2	2	2	2	2	2	2	2	2	2	2	2
7778	2	166	49	18	1	1	3	2	4	4	7	4	4	5	3	1	1	1	3	1	3	3	3	3	1	3	3	3	3	2	3	2	1	3	3	3	1	3	1	1	2	3	3	3	3	3	3	3	3
8525	2	163	48	18	1	1	3	2	4	4	7	4	3	3	2	2	1	3	3	1	5	3	3	3	3	1	3	2	3	2	3	3	1	3	3	3	2	3	3	2	3	1	1	3	3	2	2	3	2
9990	2	170	51	18	0	0	3	2	4	4	7	3	3	4	2	2	2	2	1	1	5	1	2	1	2	1	2	2	2	2	2	1	3	2	2	2	1	2	1	2	2	3	1	1	1	2	1	1	1
9987	2	156	48	18	1	0	3	4	3	1	9	3	4	5	3	2	1	2	1	1	3	2	2	2	2	3	2	2	2	2	2	2	2	2	2	2	1	2	2	2	2	2	2	2	2	2	2	3	2
10370	2	173.8	73	18	1	1	4	3	3	4	6	1	1	2	2	2	1	2	1	1	5	2	2	2	2	2	2	3	3	2	3	3	2	2	1	2	1	2	2	2	2	2	2	2	2	3	3	3	2
10059	2	165	56	18	1	0	3	3	4	3	7	2	1	2	2	1	2	1	1	1	5	2	3	3	2	1	2	3	3	3	3	3	3	2	3	3	2	3	2	2	3	3	1	3	3	2	2	2	1
7699	2	164	55	18	1	1	4	4	3	3	6	2	2	3	3	2	1	2	2	1	2	2	2	2	2	2	2	2	2	2	2	2	3	2	2	2	1	3	2	2	2	2	1	2	2	3	2	3	2
7715	1	181	75	18	1	1	3	3	5	4	5	2	2	1	3	1	1	1	1	1	1	2	3	2	2	2	2	2	2	2	2	2	3	2	2	2	1	3	2	2	2	2	1	1	3	2	2	2	1
10594	1	171	74	18	1	1	4	4	4	4	4	3	4	3	2	2	1	1	1	1	2	2	3	3	1	1	3	2	2	2	3	3	3	2	1	2	1	3	2	2	2	2	1	3	3	2	2	3	1
10322	1	180	70	18	1	1	3	3	3	3	8	5	5	5	3	5	5	5	5	5	3	2	2	2	2	2	2	2	2	2	2	2	2	2	2	2	2	2	2	2	2	2	2	2	2	2	2	2	2
7084	2	168	43	18	0	0	3	2	3	5	7	2	1	3	2	2	1	4	2	1	5	2	3	2	3	1	2	2	3	2	2	2	3	2	1	2	1	2	2	2	2	3	1	2	2	2	2	2	2
9166	2	163	53	18	1	1	2	5	4	4	5	2	2	1	2	1	1	1	4	1	3	2	2	2	2	3	2	2	3	2	2	2	3	2	1	1	1	3	2	3	3	3	1	2	2	2	2	2	2
8558	1	184	69	18	1	1	5	2	4	1	7	3	3	2	3	2	1	1	1	1	3	2	2	2	1	2	3	2	2	2	2	2	2	1	1	2	1	1	2	3	2	2	1	2	2	3	2	2	1
10082	1	170	71	18	0	0	5	3	5	1	5	2	2	2	2	2	2	2	2	1	1	2	2	2	2	2	2	2	2	2	2	2	2	2	2	2	2	2	2	2	2	2	2	2	2	3	2	2	2
10092	1	182	100	18	1	1	5	2	4	2	6	3	2	2	3	1	1	1	1	1	1	3	3	3	2	1	3	3	3	2	3	3	3	2	3	1	1	2	2	2	2	3	1	3	3	1	3	3	3
9895	1	179	74	18	1	0	5	2	4	2	6	2	2	3	3	3	3	3	3	3	2	2	2	2	2	2	2	2	2	2	2	2	2	2	2	2	2	2	2	2	2	2	2	2	2	2	2	2	2
8644	1	181	62	18	1	0	5	2	3	2	7	3	2	2	3	1	1	1	1	1	3	3	2	2	2	3	3	3	3	1	3	2	2	2	2	2	1	2	2	2	2	2	2	2	2	2	2	2	2
9039	2	168	60	18	1	1	5	4	5	1	4	2	2	3	2	2	1	2	1	1	1	1	2	2	2	2	2	3	2	2	3	3	3	2	2	2	1	2	2	2	2	2	2	2	2	2	3	3	3
8932	2	158	118	18	0	0	4	2	4	1	8	3	2	2	2	1	1	2	2	1	3	1	2	2	2	2	2	2	2	3	2	2	2	2	2	2	1	2	2	2	2	2	1	2	2	2	2	2	2
7658	2	159	43	18	1	0	5	4	4	1	5	3	2	3	2	1	1	3	1	1	2	3	3	2	2	3	3	3	3	3	3	3	2	3	3	3	1	2	3	3	3	3	3	3	3	3	3	3	3
7484	2	172.8	64	18	1	1	4	1	4	3	7	3	2	2	3	1	2	1	3	1	5	2	3	3	2	1	2	2	2	2	3	3	3	2	3	2	1	2	3	2	3	3	2	1	2	2	2	3	3
10327	1	190	88	18	1	1	4	2	4	2	7	2	2	2	3	1	1	1	1	1	5	1	2	3	3	2	3	3	3	2	3	3	3	2	3	2	1	3	2	2	2	3	2	3	3	2	2	2	2
8775	1	170	66.5	18	1	1	4	2	4	2	7	5	5	5	5	4	1	1	2	1	5	3	3	3	3	1	3	3	3	3	3	3	3	3	3	2	1	3	3	1	3	1	1	1	3	3	3	3	3
8251	2	170	63	18	0	0	4	2	4	2	7	2	1	1	2	1	1	1	1	1	3	3	3	3	3	3	3	3	3	1	3	3	3	1	3	1	1	2	3	1	3	3	2	3	3	2	3	3	3
10895	2	161	65	18	0	0	5	4	3	1	6	2	1	3	2	1	1	1	1	1	1	2	3	3	3	2	2	3	3	3	3	3	3	1	2	2	1	1	3	3	3	3	2	3	3	3	3	3	2
7162	2	175	60	18	1	1	4	2	3	2	8	2	1	2	2	1	1	1	1	1	1	2	3	2	2	2	3	3	3	2	3	3	2	2	3	2	2	2	2	2	2	3	2	3	3	3	3	3	3
8981	2	172	75	18	0	0	4	2	3	2	8	1	1	3	1	4	2	3	3	2	5	2	2	2	3	2	2	2	2	2	2	2	3	2	2	2	1	2	2	2	3	3	3	2	3	2	3	3	3
8818	2	165	50	18	0	0	4	2	3	2	8	2	4	1	2	1	1	1	1	1	1	3	3	3	1	3	3	3	3	1	3	3	3	2	2	2	1	2	3	1	3	3	2	2	3	3	3	3	2
9888	1	185	120	18	1	1	4	1	4	4	6	3	3	3	3	1	1	1	1	1	3	2	2	2	2	2	2	2	2	2	2	2	2	2	2	2	2	2	2	2	2	2	2	2	2	2	2	2	2
10540	2	165	55	18	0	1	5	5	4	1	4	2	1	2	1	1	1	1	1	1	1	3	3	3	1	3	3	3	3	1	3	3	1	3	3	3	3	3	3	3	3	3	3	3	3	3	3	3	3
8028	2	168	55.65	18	1	1	4	3	4	2	6	3	2	3	3	4	1	1	1	1	5	2	3	3	1	2	3	2	2	1	3	2	2	2	3	3	1	3	2	1	2	2	2	1	3	2	2	3	1
8241	2	175	62	18	1	0	4	3	4	2	6	2	1	2	3	1	1	1	1	1	1	2	2	2	2	2	2	2	2	2	2	2	2	2	2	2	2	2	2	2	2	2	2	2	2	2	2	2	2
9761	2	175	50	18	0	0	4	3	4	2	6	1	1	5	1	1	4	1	1	1	4	3	3	3	1	3	3	3	3	1	3	3	1	3	3	3	3	1	3	3	3	3	3	3	3	3	3	3	3
7665	1	176	76	18	1	1	5	3	4	4	3	2	3	1	2	1	1	1	1	1	1	3	3	3	2	2	3	3	3	2	3	3	3	2	1	2	1	3	3	1	3	3	3	2	3	2	3	3	3
7599	2	157	50	18	1	1	4	2	3	3	7	2	1	1	2	1	1	1	1	1	1	3	3	3	1	1	3	2	3	3	3	3	3	1	3	1	1	3	3	1	2	3	2	3	3	3	2	3	3
9860	1	178	62	18	1	1	3	2	4	2	8	2	1	1	2	1	2	1	3	1	3	3	3	3	1	2	2	2	3	2	3	3	2	3	3	3	1	3	2	1	2	3	2	3	3	3	3	3	3
8038	1	170	80	18	0	0	3	2	4	2	8	2	4	1	2	1	1	1	1	1	2	3	3	3	1	3	3	3	3	1	3	3	2	1	1	1	1	2	3	3	3	2	1	1	2	3	2	3	2
7432	1	180	58	18	1	0	4	3	3	2	7	2	1	1	2	1	1	1	1	1	1	2	2	2	2	2	2	2	2	2	2	2	2	2	2	2	2	2	2	2	2	2	2	2	2	2	2	2	2
7202	2	165	55	18	1	1	4	4	3	1	7	1	5	5	3	1	1	1	1	1	5	2	1	1	2	1	3	2	1	2	1	2	3	1	2	2	1	3	3	3	3	3	3	3	3	3	1	3	3
9815	2	184	75	18	1	1	4	3	4	3	5	3	2	3	2	2	3	2	2	1	3	2	2	2	2	2	3	2	2	2	3	2	2	2	2	1	1	3	2	2	2	2	2	2	2	2	2	2	2
9055	2	165	65	18	1	1	4	3	4	3	5	2	1	2	2	1	1	5	1	1	2	1	2	2	2	2	2	2	2	2	2	2	2	2	2	2	2	2	2	2	2	2	2	2	2	2	2	2	2
7383	1	182	63	18	1	1	4	3	4	3	5	4	4	3	3	1	1	1	1	1	5	1	1	1	3	1	1	1	1	3	1	1	3	1	1	1	1	3	1	1	1	1	1	1	1	1	1	1	1
6936	2	172	58	18	1	0	4	3	4	3	5	3	2	1	2	1	1	1	1	1	3	2	2	2	2	2	2	2	2	2	2	2	3	2	2	2	1	3	2	1	2	2	2	1	2	1	2	2	2
9517	2	173	80	18	1	1	4	4	4	2	5	3	2	3	2	3	1	1	1	1	5	2	2	2	2	1	2	2	2	2	2	2	3	2	1	2	1	2	2	2	2	2	2	2	2	2	2	2	2
8844	2	165	120	18	0	1	3	2	3	2	9	2	1	1	2	2	1	3	1	1	3	2	3	3	1	2	3	3	3	1	3	3	1	3	2	2	3	2	3	3	3	3	3	3	3	3	3	3	3
7064	1	170	62	18	0	1	3	2	3	2	9	2	2	1	2	3	3	3	3	3	3	2	2	2	2	2	2	2	2	2	2	2	2	2	2	2	2	2	2	2	2	2	2	2	2	2	2	2	2
8243	2	168	65	18	0	0	3	2	3	2	9	3	2	3	2	1	3	2	1	1	5	2	2	2	2	2	2	2	2	2	2	2	2	2	2	2	2	2	2	2	2	2	2	2	2	2	2	2	2
7689	2	160	60	18	0	0	3	2	3	2	9	4	3	3	2	5	3	2	5	3	4	2	2	2	2	2	3	3	3	2	3	3	2	3	3	3	3	3	3	3	3	3	3	3	3	3	3	3	3
7025	2	170	58	18	0	0	3	2	3	2	9	2	2	2	2	1	1	1	1	1	1	3	3	3	2	1	2	3	3	2	3	3	3	1	2	2	1	3	2	2	1	3	1	2	3	3	3	3	2
8795	2	180	50	18	0	0	3	2	6	4	4	5	4	3	3	2	2	2	2	2	1	2	2	2	2	2	2	2	2	2	2	2	2	2	2	2	2	2	2	2	2	2	2	2	2	2	2	2	2
9064	2	167	69	18	1	0	3	3	3	1	9	2	1	3	3	1	1	1	1	1	3	3	3	3	3	3	3	3	3	2	3	3	2	2	2	2	1	3	3	1	3	2	1	3	3	3	3	3	2
8756	2	166	54	18	1	0	3	3	5	3	5	2	2	2	2	2	2	2	2	2	2	2	2	2	2	2	2	2	2	2	2	2	2	2	2	2	2	2	2	2	2	2	2	2	2	2	2	2	2
7172	1	185	75	18	0	1	3	2	3	3	8	2	2	1	2	1	1	1	1	1	1	2	3	2	3	2	2	2	2	2	2	2	3	1	3	2	1	3	1	1	1	3	2	2	2	2	2	2	2
8226	2	150	45	18	0	1	3	2	3	3	8	3	3	2	2	3	4	3	2	1	3	2	2	2	2	2	2	2	2	2	2	2	2	2	2	2	2	2	2	2	2	2	2	2	2	2	2	2	2
6881	1	180	58	18	0	0	3	2	3	3	8	4	2	3	2	2	1	1	1	1	3	2	3	3	1	1	2	1	3	2	3	3	2	3	3	3	1	2	3	3	3	3	1	3	3	3	3	3	3
7483	2	163	52	18	1	0	3	2	4	4	6	2	2	2	2	2	2	2	1	1	5	2	2	2	2	2	2	2	2	2	2	2	2	2	2	2	2	2	2	2	2	2	2	2	2	2	2	2	2
9108	1	175	70	18	1	0	3	3	4	3	6	3	2	3	3	1	1	1	1	1	2	3	3	3	1	3	3	3	3	1	3	3	1	3	3	3	3	1	3	3	3	3	3	3	3	3	3	3	3
8890	2	169	60	18	1	0	3	3	4	3	6	2	1	4	3	1	1	1	1	1	1	1	3	3	1	2	3	3	3	2	3	2	1	1	1	1	1	2	1	1	2	3	3	2	2	3	3	3	3
9758	2	156	45	18	0	1	4	4	3	3	5	4	4	3	3	4	4	2	4	2	1	1	3	3	1	1	3	2	2	1	2	2	2	3	2	3	3	1	3	3	3	2	3	2	2	3	2	3	2
2306	1	183	90	18	0	0	3	2	3	4	7	2	1	1	2	1	1	1	1	1	1	2	2	2	2	3	3	2	2	2	2	2	2	2	2	2	2	2	2	2	2	2	2	2	2	2	2	2	2
9472	2	169	58	18	0	1	3	3	3	3	7	2	1	1	2	1	1	1	1	1	1	3	3	2	2	3	3	3	3	3	3	3	3	2	2	2	1	2	2	2	2	3	1	2	2	2	3	3	2
8860	2	166	50	18	1	1	3	3	3	3	7	2	1	2	2	1	1	2	2	1	3	2	2	2	1	2	3	2	3	2	2	2	3	2	1	2	1	3	2	2	2	3	1	2	2	3	2	2	1
8560	1	173	160	18	1	0	3	3	3	3	7	3	1	3	1	3	2	1	1	1	3	2	3	2	2	3	3	2	2	1	3	2	3	3	2	2	2	3	3	3	3	3	3	3	3	3	1	2	3
10257	1	175	65	18	0	0	3	3	3	3	7	2	1	2	2	2	2	2	2	2	1	2	2	2	2	2	2	2	2	3	2	2	3	1	2	1	1	3	2	1	2	2	1	2	2	2	2	2	1
7568	2	168	68	18	0	1	2	1	5	5	6	4	3	3	3	4	3	3	1	1	5	2	2	2	3	1	1	2	2	3	1	1	1	1	2	2	1	1	1	2	2	2	1	1	2	3	1	1	2
8362	2	161	63	18	1	0	3	3	4	4	5	3	3	4	2	3	2	4	2	1	4	2	2	3	2	2	2	2	2	2	2	2	2	2	2	2	1	2	2	2	2	2	2	2	2	2	2	2	2
7669	2	161	55	18	0	1	3	3	2	3	8	2	2	2	3	1	1	1	1	1	5	2	2	2	2	2	2	2	2	2	2	2	3	2	2	2	1	2	2	2	2	2	1	2	2	2	2	2	2
7957	1	181	80	18	1	1	2	1	3	5	8	3	2	2	2	1	1	1	1	1	2	3	3	3	1	2	3	3	3	2	3	3	3	2	2	2	1	3	2	3	2	3	1	3	3	3	3	3	2
7458	1	180	75	18	0	1	2	3	3	3	8	1	1	2	1	1	1	1	1	1	3	1	1	1	3	1	1	1	1	3	1	1	3	1	1	1	1	3	1	1	1	1	1	1	1	1	1	1	1
8207	2	170	50	18	1	0	2	3	3	3	8	5	3	5	3	5	2	3	1	1	3	2	2	2	3	2	2	1	2	2	2	2	2	2	3	3	2	2	3	3	3	3	2	2	2	2	2	2	1
9243	1	183	65	18	1	0	5	1	4	1	7	4	3	3	3	2	2	2	2	1	3	2	2	2	2	2	2	2	2	2	2	2	2	2	2	2	2	2	2	2	2	2	2	2	2	2	2	2	2
8522	2	160	54	18	1	1	5	2	5	1	5	4	3	4	2	2	1	1	1	1	1	3	3	3	1	2	3	2	3	2	2	3	3	2	1	2	1	3	2	2	2	3	2	2	2	3	2	3	2
9096	2	171	51	18	1	1	5	2	5	1	5	2	1	1	2	1	1	1	1	1	3	2	3	3	3	2	3	3	3	2	3	3	3	1	3	2	1	3	2	2	2	3	3	2	3	2	3	3	2
8486	1	180	67	18	1	1	5	3	5	1	4	1	1	4	1	4	1	1	1	1	3	3	3	3	1	1	3	1	2	3	1	1	3	1	1	1	1	3	1	1	1	1	1	1	1	3	1	1	1
7726	1	178	124	18	1	1	5	2	4	2	5	2	2	2	2	2	2	1	1	1	3	1	1	1	3	1	1	1	1	3	1	1	3	1	1	1	1	3	1	1	1	1	1	1	1	1	1	1	1
9898	1	183	55	18	0	1	4	2	4	1	7	3	2	2	2	4	1	5	2	1	1	3	3	3	2	1	3	2	3	1	3	3	2	3	1	3	2	2	3	3	3	3	1	2	3	3	2	2	3
9835	1	172	60	18	0	0	4	2	4	1	7	3	3	2	3	3	3	3	3	3	1	2	2	2	2	2	2	2	2	2	2	2	2	2	2	2	2	2	2	2	2	2	2	2	2	2	2	2	2
8941	1	182	61	18	1	0	4	1	2	1	10	1	1	3	2	4	1	2	1	1	3	2	2	2	2	2	2	2	2	2	2	2	2	2	2	2	2	2	2	2	2	2	2	2	2	2	2	2	2
7564	1	171	120	18	1	1	4	2	4	2	6	2	2	3	3	3	3	3	3	2	2	2	2	2	2	2	2	2	2	2	2	2	2	2	2	2	2	2	2	2	2	2	2	2	2	2	2	2	2
7336	2	172	75	18	1	1	4	2	4	2	6	3	2	2	2	1	1	1	1	1	5	2	2	3	3	2	2	2	3	2	3	3	3	2	2	3	1	2	2	2	2	3	1	3	3	2	3	3	1
7312	2	163	75	18	1	1	4	2	4	2	6	3	3	4	3	3	2	2	1	1	4	2	2	2	3	1	2	2	2	2	2	2	2	2	2	1	1	2	2	2	1	1	1	2	2	2	2	1	1
6842	2	160	55	18	1	1	4	2	4	2	6	4	2	2	3	2	2	2	2	2	2	2	2	2	2	2	2	2	2	2	2	2	2	2	2	2	2	2	2	2	2	2	2	2	2	2	2	2	2
9870	2	162	52	18	1	1	4	2	4	2	6	2	3	3	2	1	1	1	1	1	1	3	3	3	1	3	3	3	3	1	3	3	1	3	3	3	3	3	3	3	3	3	3	3	3	3	3	3	3
8213	2	169	76	18	0	0	4	2	4	2	6	2	1	1	2	1	1	1	1	1	5	2	2	3	2	3	3	3	3	2	3	3	3	3	3	3	1	3	3	1	2	3	3	3	3	3	3	3	3
8465	2	168	60	18	0	0	4	2	4	2	6	2	2	3	2	3	3	3	3	2	2	2	2	2	2	2	2	2	2	2	2	2	3	1	1	2	1	3	2	2	2	2	2	2	2	2	2	2	2
10484	2	158.9	53	18	1	0	4	2	4	2	6	3	2	3	2	1	1	1	1	1	3	2	2	3	1	2	3	3	2	2	3	2	2	2	3	3	1	2	3	2	3	2	1	3	3	2	2	3	2
7238	2	158	45	18	1	1	3	2	5	1	7	3	3	3	3	1	1	1	1	1	1	2	2	2	2	2	2	2	2	2	2	2	3	1	1	2	1	2	2	2	2	2	2	2	2	2	2	2	2
11242	2	162	48	18	0	0	3	1	3	1	10	2	1	3	2	2	2	2	2	1	3	2	2	2	2	2	2	2	2	2	2	2	2	2	2	1	1	3	2	2	2	2	1	2	3	3	3	3	2
8866	1	175	65	18	1	1	4	2	3	2	7	3	2	3	3	2	1	1	1	1	2	2	3	3	1	1	3	2	3	3	2	2	3	2	2	2	1	3	1	3	3	3	2	2	3	3	3	3	1
9192	2	158	63	18	0	1	4	2	3	2	7	3	2	3	2	2	2	2	2	2	3	2	2	2	2	2	2	2	2	2	2	2	2	2	2	2	2	2	2	2	2	2	2	2	2	2	2	2	2
7119	2	163	48	18	1	1	4	2	3	2	7	3	2	3	2	1	1	1	1	1	3	3	3	3	1	2	2	2	2	2	2	2	2	2	1	3	1	3	2	2	3	2	1	2	2	2	2	2	1
7492	2	160	47	18	1	1	4	3	3	1	7	3	2	2	2	1	1	1	1	1	4	3	3	3	1	1	3	2	3	2	3	3	2	3	2	3	1	2	3	3	3	3	2	2	3	2	3	2	2
10338	1	168	71	18	1	0	4	3	3	1	7	1	1	3	2	2	1	2	1	1	2	2	3	3	2	3	3	3	3	3	3	3	3	3	3	2	1	3	3	2	2	2	3	2	3	2	3	3	1
8529	1	170	65	18	0	0	4	2	4	3	5	2	2	2	2	1	1	1	1	1	1	1	3	3	3	3	3	3	3	3	3	3	3	3	3	3	3	1	3	3	3	3	1	3	3	3	3	3	3
10034	2	165	105	18	1	0	4	3	4	2	5	2	2	2	2	2	2	2	2	1	2	2	3	1	2	3	2	3	3	2	3	3	3	1	1	2	1	3	1	2	2	2	1	1	1	2	2	2	1
9135	1	172	68	18	1	0	4	3	4	3	4	3	2	5	3	2	1	3	4	1	1	1	3	3	2	3	3	2	2	1	2	2	2	3	3	3	1	3	2	1	1	2	1	2	2	3	2	2	3
8746	1	185	65	18	1	0	4	3	4	3	4	3	4	1	2	1	1	1	1	1	1	3	3	3	1	3	3	3	3	1	3	3	3	2	2	2	1	2	2	2	2	2	2	2	2	2	2	2	2
9656	1	173	56	18	1	0	4	3	4	3	4	3	2	3	2	2	2	1	1	1	2	2	2	2	3	1	2	2	2	2	2	2	3	2	1	2	1	2	2	1	2	2	2	2	2	2	2	2	2
8177	2	168	75	18	0	1	3	2	3	2	8	2	4	1	1	4	4	4	4	4	1	2	2	2	2	2	2	2	2	2	2	2	2	2	2	2	2	2	2	2	2	2	2	2	2	2	2	2	2
8390	1	182	55	18	1	1	3	2	3	2	8	3	3	2	2	2	3	2	1	1	3	2	2	2	2	2	2	2	2	2	2	2	3	2	2	2	1	2	3	1	1	2	2	2	2	3	3	3	3
9759	1	171	156	18	0	0	3	2	3	2	8	2	2	2	2	1	1	1	2	1	2	1	3	3	2	3	3	3	3	1	2	2	2	3	3	1	1	2	2	3	3	3	3	1	3	3	3	3	3
10404	1	175	65	18	0	0	3	2	3	2	8	2	2	3	2	1	1	1	1	1	2	2	3	3	2	1	3	3	3	3	3	2	2	3	3	2	1	2	2	3	2	3	1	2	3	3	3	2	3
7044	2	163.6	48	18	0	0	3	2	3	2	8	1	2	5	3	2	2	2	2	2	2	2	2	2	2	2	2	2	2	2	2	2	2	2	2	2	2	2	2	2	2	2	2	2	2	2	2	2	2
8305	2	163	109	18	1	1	3	2	4	3	6	2	2	3	2	2	2	3	1	1	5	3	2	2	3	3	2	2	2	2	2	2	3	2	2	3	1	2	3	3	1	2	1	2	2	2	3	3	1
9639	2	158	80	18	0	0	4	3	4	4	3	3	2	3	2	2	2	3	2	1	3	2	2	2	2	2	2	2	2	2	2	2	2	2	2	2	1	2	2	2	2	2	2	2	2	2	2	2	2
8404	2	168	98	18	1	1	2	2	4	2	8	5	5	5	1	5	5	1	5	1	5	2	3	3	1	3	3	3	3	3	3	3	3	3	3	3	3	2	3	3	3	3	1	3	3	3	3	3	3
10822	2	176	60	18	0	0	3	3	3	2	7	2	2	1	2	1	1	1	1	1	3	2	3	3	2	1	1	3	3	1	3	3	3	2	1	2	1	1	3	3	3	2	2	2	2	2	2	2	2
9968	2	167	58	18	0	0	3	3	3	2	7	1	1	3	2	3	1	3	1	1	3	2	2	2	2	2	2	2	2	2	2	2	2	2	2	2	2	2	2	2	2	2	2	2	2	2	2	2	2
9578	2	165	50	18	1	1	3	2	4	4	5	3	3	1	3	2	2	2	2	2	5	3	2	3	1	1	3	3	3	3	3	3	2	3	3	3	2	3	3	3	2	2	1	3	3	3	3	2	1
9081	2	165	100	18	0	0	3	2	4	4	5	1	1	1	2	2	2	2	2	1	3	3	3	3	2	3	3	3	3	2	3	3	3	2	2	2	1	2	2	2	2	2	2	2	2	2	2	2	2
10030	2	160	50	18	1	1	3	3	4	3	5	4	3	3	2	2	1	1	1	1	1	2	2	3	3	1	1	3	2	3	3	3	3	2	2	2	1	3	3	1	3	3	2	2	3	3	3	3	3
9499	2	166	75	18	0	0	2	2	3	2	9	2	1	2	2	3	1	2	1	1	4	3	3	3	1	2	3	3	3	3	3	3	2	2	3	2	1	2	2	2	2	3	2	2	3	2	3	3	2
7946	1	175	78	18	0	1	3	3	3	3	6	3	4	3	3	1	2	3	2	1	3	3	3	3	1	2	3	3	3	2	2	3	3	2	2	2	1	2	3	3	3	3	2	2	3	2	3	3	3
7415	2	163	71	18	1	0	3	3	3	3	6	1	1	2	2	1	1	1	1	1	2	2	2	3	2	2	3	2	2	3	3	3	3	2	3	3	1	2	3	2	3	3	1	3	3	2	2	3	2
7020	2	160	60	18	0	1	3	3	2	3	7	2	2	1	2	3	2	4	2	1	3	2	3	3	1	2	2	2	2	2	2	2	3	2	2	3	1	3	2	1	2	2	1	3	3	3	2	3	1
7537	1	175	90	18	1	1	2	5	5	1	5	2	2	2	2	2	5	5	5	1	5	3	3	3	1	1	3	3	3	3	3	3	3	3	1	3	1	3	3	3	3	1	3	3	3	3	3	3	1
7482	2	160	60	18	0	0	5	1	3	1	7	3	2	3	2	2	1	1	1	1	3	2	2	3	2	2	2	2	2	2	2	3	3	2	1	2	1	2	2	2	2	2	1	2	2	3	2	2	2
8191	2	170	82	18	1	1	5	2	4	1	5	3	1	2	2	1	1	1	1	1	1	2	3	3	1	2	2	3	3	2	3	3	3	2	2	2	1	2	2	1	2	2	2	2	2	2	2	2	1
8180	2	165	75	18	0	1	4	1	3	1	8	2	1	1	2	1	1	1	1	1	1	1	2	2	2	1	1	3	3	3	3	3	3	1	1	1	1	3	2	1	2	2	1	1	2	2	2	2	1
7070	2	170	58	18	0	0	4	1	3	1	8	4	3	4	3	4	3	2	2	1	5	2	2	2	2	2	2	2	2	2	2	2	2	2	2	2	2	2	2	2	2	2	2	2	2	2	2	2	2
8042	2	170	60	18	1	1	5	2	3	2	5	3	1	2	2	2	1	1	1	1	5	3	3	3	1	2	3	3	3	2	3	3	3	2	1	1	1	2	3	1	3	3	2	1	3	2	3	3	2
6986	1	175	70	18	1	1	5	3	3	1	5	3	3	3	3	3	3	3	3	3	3	2	3	2	2	2	2	2	2	2	2	2	1	2	3	2	2	2	2	2	2	2	2	2	2	2	2	2	2
10495	2	163	53	18	0	0	4	2	3	1	7	4	4	3	2	1	1	2	1	1	1	1	3	2	2	2	2	2	2	2	2	2	3	2	2	2	1	2	1	1	1	2	1	1	2	2	2	2	2
7139	2	160	45	18	0	0	4	2	3	1	7	2	2	3	2	2	2	2	2	1	5	2	2	2	2	2	3	2	3	2	2	3	3	2	1	2	1	2	1	3	3	3	3	2	2	2	2	3	2
7257	1	176	55	18	1	1	4	2	4	2	5	3	3	1	2	2	2	4	2	1	5	3	3	3	2	1	3	2	3	2	3	3	3	2	1	2	1	3	2	2	2	2	1	2	2	2	2	2	2
8271	2	174	65	18	1	0	4	2	4	2	5	2	1	2	2	1	1	1	1	1	2	3	3	3	1	3	3	2	3	2	3	3	2	2	3	2	2	3	3	2	2	2	1	3	3	2	2	3	3
7107	2	168	63	18	0	0	4	2	4	2	5	2	2	1	2	1	1	1	1	1	3	1	3	3	3	1	3	3	3	3	3	3	3	1	1	1	1	3	3	3	1	3	3	3	3	3	3	3	3
11036	2	157	52	18	0	0	4	2	4	2	5	3	4	4	2	3	1	1	1	1	5	3	3	3	2	1	3	3	3	2	3	3	2	3	3	3	2	1	3	3	2	2	2	3	3	2	3	3	3
6867	2	165	50	18	0	0	4	2	4	2	5	2	1	1	2	1	1	1	1	1	1	2	2	2	2	2	2	2	2	2	2	2	2	2	2	2	2	2	2	2	2	2	2	2	2	2	2	2	2
6946	2	164	49	18	0	0	4	2	4	2	5	3	2	2	3	1	1	2	1	1	2	1	3	3	3	3	1	3	3	3	3	3	3	1	2	2	1	3	3	2	1	3	1	3	3	3	2	3	1
8164	2	154	44	18	0	0	4	2	4	2	5	1	1	2	2	1	1	2	1	1	3	2	2	2	2	2	2	2	2	2	2	2	2	2	2	2	2	3	2	2	2	2	2	2	2	2	2	2	2
10593	2	155	41	18	1	0	4	2	4	2	5	5	3	4	2	1	1	1	1	1	2	3	3	3	1	3	3	3	3	2	3	3	3	2	3	2	1	3	3	3	3	3	3	3	3	3	3	3	1
7781	2	156	47	18	1	0	4	3	4	1	5	3	2	2	2	1	1	1	1	1	1	2	2	2	1	1	2	1	2	2	2	2	3	2	1	1	1	3	2	2	2	2	1	1	2	2	2	2	2
8679	1	173	75	18	0	1	4	2	3	2	6	2	1	1	2	1	1	1	1	1	3	3	3	3	2	2	2	3	3	3	3	3	3	2	2	2	1	3	2	2	2	2	2	2	2	2	3	2	3
8076	2	165	70	18	1	1	4	2	3	2	6	2	1	1	2	1	1	1	1	1	2	3	3	3	1	3	3	3	3	1	3	3	3	2	2	2	2	2	2	2	2	2	2	2	2	2	2	2	2
7538	1	180	61	18	1	1	4	2	3	2	6	2	1	2	2	1	3	2	4	1	2	2	3	3	2	2	2	3	3	2	2	2	2	2	2	2	1	3	1	2	2	2	2	2	2	2	2	2	2
10553	1	175	55	18	1	1	4	2	3	2	6	2	1	1	2	1	1	1	1	1	5	1	1	2	3	2	3	3	3	1	3	3	3	3	2	3	1	3	3	3	3	3	2	1	3	3	3	3	2
7137	2	162	51	18	0	1	4	2	3	2	6	2	2	2	2	1	1	1	1	1	4	1	1	2	3	2	2	2	2	2	2	2	2	2	2	2	2	2	2	2	2	2	2	2	2	2	2	2	2
11615	2	166	56	18	0	0	4	2	3	2	6	2	2	2	1	1	1	1	1	1	1	2	2	3	3	2	3	2	2	2	3	3	3	3	3	3	1	3	3	1	3	3	3	3	3	3	2	3	2
7782	2	168	55	18	1	0	4	2	3	2	6	2	1	1	2	1	1	1	1	1	2	3	3	3	1	3	3	3	3	1	3	3	2	3	2	2	1	3	1	2	2	3	2	3	3	2	2	3	2
8899	1	172	54	18	0	0	4	3	3	1	6	4	4	3	3	2	1	2	2	1	3	3	3	3	1	3	2	2	2	3	2	2	3	1	2	2	2	3	2	2	2	2	2	2	2	2	2	2	2
6838	1	180	60	18	1	1	3	1	5	3	5	2	2	2	2	2	2	2	2	2	1	2	2	2	2	2	2	2	2	2	2	2	2	2	2	2	2	2	2	2	2	2	2	2	2	2	2	2	2
11254	2	168	60	18	0	0	4	2	4	3	4	3	3	3	2	3	3	3	3	3	1	2	2	2	2	2	2	2	2	2	2	2	2	2	2	2	2	2	2	2	2	2	2	2	2	2	2	2	2
7376	1	189	70	18	0	1	4	2	2	2	7	2	4	1	2	1	1	1	1	1	1	2	3	3	2	1	2	3	2	2	2	3	3	2	2	2	2	2	2	3	2	3	2	2	2	2	3	2	2
5624	1	188	80	18	1	1	4	4	4	1	4	2	2	1	2	3	1	1	1	1	3	3	3	2	2	1	3	3	3	1	3	3	1	2	3	2	1	3	2	2	3	1	1	1	3	2	3	3	2
7109	2	170	60	18	0	0	3	2	3	1	8	3	2	2	2	2	1	1	1	1	5	3	3	3	3	2	3	3	3	2	3	3	2	2	1	1	1	1	3	3	3	3	2	3	3	3	3	3	3
8152	2	166	55	18	0	0	3	2	3	1	8	2	2	3	2	2	1	2	2	1	1	2	3	3	3	2	3	3	3	2	3	3	2	2	2	3	1	3	2	1	2	3	1	2	3	3	3	3	1
8153	2	166	55	18	0	0	3	2	3	1	8	2	2	3	2	2	1	2	2	1	1	2	3	3	3	2	3	3	3	2	3	3	2	2	2	3	1	3	2	1	2	3	1	2	3	3	3	3	1
8919	2	164	52	18	0	0	3	2	3	1	8	2	2	2	2	1	1	1	1	1	1	1	3	3	1	3	3	3	3	3	3	3	3	2	3	2	1	3	2	2	3	3	3	3	3	3	3	3	3
9252	2	160	60	18	0	0	3	2	4	2	6	3	2	1	3	1	2	1	4	1	3	2	3	3	3	3	3	3	3	3	2	3	2	3	2	3	2	2	2	2	2	2	1	3	3	3	3	3	2
8671	2	168	55	18	1	0	5	5	4	2	1	5	4	4	1	5	5	1	2	1	2	3	3	3	1	3	3	3	3	1	3	3	3	3	3	3	3	2	3	2	3	3	3	3	3	3	3	3	3
10416	1	165	53	18	1	1	4	3	3	2	5	2	2	3	2	1	1	1	1	1	1	1	3	3	2	3	3	3	3	1	3	3	1	3	3	3	3	3	1	1	3	3	3	3	3	3	3	3	2
7187	1	186	59	18	0	0	3	2	2	1	9	3	2	2	2	1	1	1	2	1	5	2	3	3	3	1	2	3	3	1	3	2	2	2	1	3	1	3	2	1	2	3	1	3	2	3	3	3	2
3619	1	178	180	18	1	1	3	2	3	2	7	2	4	1	1	1	1	1	1	1	1	1	2	2	2	2	2	2	2	2	2	2	2	2	2	2	2	2	2	2	2	2	2	2	2	2	2	2	2
9568	2	168	60	18	0	1	3	2	3	2	7	2	2	1	2	1	1	1	1	1	1	2	2	2	2	2	3	2	3	2	3	3	3	2	3	1	1	3	2	2	2	2	3	3	3	3	3	3	3
8142	2	161	60	18	0	1	3	2	3	2	7	2	2	3	2	2	1	1	1	1	5	2	3	3	2	1	3	2	3	1	2	2	2	2	3	2	1	3	3	3	2	1	3	3	2	3	2	3	2
9312	2	162	56	18	1	1	3	2	3	2	7	2	2	3	2	2	1	1	1	1	5	2	2	2	2	2	2	2	2	2	2	2	3	2	2	2	2	2	2	2	2	2	2	2	2	2	2	2	2
9296	1	183	84	18	0	0	3	2	3	2	7	3	1	1	2	1	1	1	1	1	2	2	2	2	2	1	2	3	2	2	2	3	2	2	1	2	1	2	2	2	2	2	1	2	3	3	3	3	1
8398	1	176	73	18	0	0	3	2	3	2	7	3	2	4	2	1	1	1	1	1	2	2	3	3	2	1	3	2	3	3	3	3	3	3	3	3	1	2	2	2	3	3	1	3	3	3	3	3	3
7177	2	160	54	18	0	0	3	2	3	2	7	3	4	3	2	3	1	1	1	1	3	2	2	3	2	2	3	2	3	2	3	3	2	2	1	3	1	2	2	3	3	3	1	1	2	3	2	3	3
7738	2	156	54	18	0	0	3	2	3	2	7	2	2	2	2	1	1	3	1	1	3	3	3	2	2	2	2	2	2	2	2	2	3	2	1	1	1	3	2	2	2	2	2	2	2	2	2	2	2
6916	2	154	53	18	0	0	3	2	3	2	7	3	1	3	2	1	1	1	1	1	3	2	2	2	2	2	2	2	2	2	2	2	2	2	2	2	2	2	2	2	2	2	2	2	2	2	2	2	2
7241	2	162	45	18	0	0	3	2	3	2	7	2	4	3	2	1	1	1	1	1	5	2	2	3	2	2	2	3	2	2	2	2	3	2	1	2	1	3	2	2	1	2	2	2	2	2	2	2	1
8506	2	164	45	18	0	0	3	3	3	1	7	2	1	1	2	1	1	1	1	1	1	2	2	2	3	2	2	2	2	3	2	2	3	1	1	1	1	3	1	1	1	2	2	2	2	2	2	2	2
6852	2	158	46.5	18	0	0	4	3	3	3	4	1	1	2	2	1	1	1	1	1	5	2	2	2	2	2	2	2	2	2	2	2	3	2	2	2	2	3	2	2	2	2	2	2	2	2	2	2	2
10458	2	157	55	18	0	1	3	3	4	2	5	2	1	3	2	1	1	1	1	1	5	2	2	2	2	2	2	2	2	2	2	2	2	2	2	2	2	2	2	2	2	2	2	2	2	2	2	2	2
9154	2	168.5	75	18	0	0	3	2	2	2	8	3	2	3	2	1	3	1	2	1	5	2	3	3	2	2	3	3	2	3	3	3	2	1	1	1	1	3	2	1	1	2	2	2	3	2	3	3	2
8570	1	183	70	18	1	1	3	4	4	1	5	2	2	2	2	1	1	1	1	1	1	3	3	3	1	3	3	3	3	1	3	3	1	3	3	1	1	3	3	3	3	3	3	3	3	3	3	3	3
7096	2	168	110	18	0	1	3	3	2	1	8	3	1	4	2	1	1	1	1	1	3	1	3	3	3	2	2	2	2	2	2	2	2	2	2	2	2	2	2	2	2	2	2	2	2	2	2	2	2
10098	2	165	85	18	1	1	3	3	5	3	3	4	3	3	3	2	2	3	2	1	3	2	2	3	2	2	3	2	2	2	3	3	2	2	2	3	1	2	3	2	3	3	2	3	3	3	2	3	2
6833	1	185	65	18	1	1	3	2	3	3	6	1	2	2	3	3	3	3	3	3	3	2	2	2	2	2	2	2	2	2	2	2	2	2	2	2	2	2	2	2	2	2	2	2	2	2	2	2	2
10036	2	159	60	18	1	1	2	2	4	2	7	4	4	2	3	1	1	1	1	1	3	2	2	2	2	2	2	2	2	2	2	2	3	2	2	2	1	2	2	2	2	2	2	2	2	2	2	2	2
10069	1	185	70	18	1	0	3	3	3	2	6	3	1	1	1	4	4	4	4	4	4	3	3	3	1	3	3	3	3	1	3	3	1	3	3	3	3	1	3	3	3	3	3	3	3	3	3	3	3
10392	2	163	48	18	1	1	3	3	4	3	4	1	3	3	3	3	3	3	3	3	3	2	2	2	2	2	2	2	2	2	2	2	2	2	2	2	2	2	2	2	2	2	2	2	2	2	2	2	2
7337	2	165	60	18	0	0	3	5	4	1	4	2	2	1	3	1	1	1	1	1	3	2	3	3	1	3	3	3	3	2	3	3	3	2	3	2	1	3	3	3	3	3	3	3	3	3	3	3	2
8199	1	178	75	18	1	1	2	3	3	3	6	3	3	3	1	2	1	4	1	1	5	2	2	3	1	1	3	2	2	2	3	2	1	2	3	2	2	1	3	3	3	1	3	1	3	3	2	2	2
10279	2	163	70	18	0	0	2	5	2	3	5	1	2	4	2	1	1	3	3	1	5	2	3	2	2	2	3	2	3	2	2	2	3	2	2	2	1	2	3	2	2	3	2	2	3	2	2	3	3
9198	2	167	58	18	0	1	5	1	4	1	5	4	2	4	3	2	2	2	2	1	5	2	2	2	2	2	2	2	2	2	2	2	3	1	2	1	1	3	1	2	2	2	2	2	2	2	2	2	2
8400	1	170	65	18	1	1	4	1	5	1	5	3	3	5	3	3	1	3	2	1	2	2	2	2	2	2	2	2	2	2	2	2	2	2	2	2	2	2	2	2	2	2	2	2	2	2	2	2	2
8975	2	162	52	18	1	0	4	1	4	1	6	3	1	3	2	1	2	2	3	1	5	2	3	3	3	2	3	3	3	3	3	3	3	3	2	2	1	3	3	2	3	3	2	3	3	3	3	3	3
10376	2	153	45	18	0	0	4	1	4	1	6	1	1	1	2	1	1	1	1	1	5	2	2	3	2	1	3	2	2	2	2	2	3	2	2	2	1	2	2	2	3	3	3	3	3	2	2	2	2
7363	2	150	45	18	0	0	4	1	4	1	6	2	2	4	2	1	1	1	1	1	1	2	2	2	2	2	2	2	2	2	2	2	3	2	2	2	1	2	2	2	2	2	2	2	2	2	2	2	1
8870	2	160	48	18	0	1	5	2	3	1	5	2	2	3	2	2	1	1	1	1	5	2	1	2	1	2	3	2	2	2	2	2	3	2	3	2	1	2	2	2	3	3	2	1	3	3	2	3	3
10227	2	160	45	18	1	0	5	2	3	1	5	3	3	4	2	1	1	2	4	1	5	2	2	3	1	2	2	3	3	2	3	3	3	1	3	2	1	3	2	2	2	3	1	2	3	2	2	2	2
9491	2	166	52	18	0	0	4	1	4	2	5	2	1	1	2	1	1	1	1	1	3	2	2	2	2	2	2	2	2	3	3	3	3	2	1	1	1	3	2	2	2	3	2	2	2	2	3	3	2
8589	2	160	90	18	1	1	4	2	4	1	5	3	3	5	2	1	1	1	1	1	3	2	2	3	2	2	3	2	2	2	2	2	2	2	2	2	2	2	3	3	3	3	2	2	2	3	2	2	2
7707	1	172	76	18	1	1	4	2	4	1	5	2	1	2	2	1	1	1	1	1	5	3	3	3	2	3	3	3	3	1	3	3	1	2	2	3	3	3	2	2	2	2	2	2	2	2	2	2	2
7666	2	164	60	18	1	1	4	2	4	1	5	2	1	3	3	1	1	1	1	1	4	3	2	3	1	1	3	3	2	1	3	2	1	2	2	1	1	2	2	2	3	3	3	2	3	2	1	3	1
9428	1	173	67	18	1	1	4	2	3	1	6	2	2	3	2	2	2	2	2	1	3	2	2	2	2	2	3	3	3	1	3	3	1	2	2	2	2	2	2	2	2	2	2	2	2	2	2	2	2
8990	2	175	62	18	0	0	4	2	3	1	6	2	1	1	2	1	1	1	1	1	3	2	3	2	2	1	2	2	3	2	3	2	2	2	1	2	1	2	1	2	2	2	2	2	3	2	2	3	3
8785	1	175	101	18	1	1	4	2	4	2	4	3	1	2	3	1	2	1	2	1	2	2	2	2	2	2	2	2	2	2	2	2	2	2	2	2	2	2	2	2	2	2	2	2	2	2	2	2	2
7999	1	179	113	18	0	1	3	1	3	1	8	1	1	2	2	4	2	2	2	1	3	2	2	2	1	2	3	2	2	2	2	2	2	2	2	2	2	2	2	2	3	2	2	2	2	3	2	2	3
8150	2	165	63	18	0	1	3	1	3	1	8	1	2	2	2	1	1	1	1	1	1	1	2	3	2	1	3	2	3	2	2	3	3	2	1	3	1	3	3	3	3	3	2	3	3	3	3	3	1
10334	2	167	62.5	18	0	0	3	1	3	1	8	2	1	1	3	1	1	1	3	1	1	2	3	3	3	2	2	2	2	3	3	3	3	2	3	2	1	3	3	1	2	3	2	2	2	2	2	2	3
9665	1	175	73	18	1	1	4	2	2	1	7	3	1	1	3	4	1	2	2	1	3	2	2	3	1	3	3	3	3	2	3	3	3	2	2	2	1	2	2	2	2	2	2	2	2	2	2	2	2
9225	1	175	60	18	1	1	4	1	3	3	5	3	2	2	3	1	1	1	1	1	1	2	2	2	2	2	2	2	2	3	2	2	3	1	1	1	1	3	2	1	2	2	2	1	2	2	2	2	1
7282	2	160	60	18	1	1	4	2	3	2	5	2	1	2	2	1	1	1	1	1	1	2	3	3	2	3	3	3	3	2	3	3	3	1	1	2	1	3	3	1	2	3	2	3	3	2	3	3	2
9028	2	163	58	18	0	0	4	2	3	2	5	2	2	4	2	3	2	3	3	1	3	2	3	2	2	2	2	2	2	2	2	2	2	2	2	2	2	2	2	2	2	2	1	2	2	2	2	2	2
9138	2	180	50	18	0	0	3	2	4	1	6	2	1	3	2	3	3	3	3	3	1	2	2	2	2	2	2	2	2	2	2	2	2	2	2	2	2	2	2	2	2	2	2	2	2	2	2	2	2
8697	1	178	65	18	1	1	4	3	3	1	5	2	3	1	2	2	1	3	1	1	2	2	3	2	3	1	2	3	2	3	3	3	2	1	3	2	1	3	2	1	3	2	2	3	3	3	2	3	2
9335	2	158.5	48.7	18	1	1	4	3	3	1	5	1	1	1	2	3	2	2	2	1	5	2	2	3	2	1	3	3	1	1	2	2	2	3	3	1	1	2	2	2	2	2	1	3	1	2	2	2	1
7467	2	165	50	18	0	0	3	1	2	1	9	3	2	3	2	2	2	2	2	2	3	2	2	2	2	2	2	2	2	2	2	2	2	2	2	2	1	3	2	2	2	2	2	2	2	2	2	2	2
10525	1	176	53	18	0	0	4	2	4	3	3	2	1	1	2	1	1	1	1	1	1	2	3	3	1	3	3	3	3	1	3	3	3	3	3	3	1	3	3	2	3	3	3	3	3	3	3	3	3
9988	2	160	58	18	0	0	4	2	2	2	6	2	2	2	2	2	2	4	3	1	1	2	2	2	2	2	2	2	2	2	2	2	3	1	2	2	1	3	2	1	2	2	2	2	2	2	2	2	2
7853	1	183	51	18	0	0	3	2	3	1	7	2	1	1	2	1	1	1	1	1	1	3	3	3	2	3	3	3	3	1	3	3	2	2	3	3	2	1	3	2	3	3	3	3	3	3	3	3	3
8503	2	160	55	18	1	1	3	2	4	2	5	3	2	3	3	1	1	2	1	1	3	2	2	2	2	2	3	3	3	2	2	2	3	2	2	1	1	2	2	2	2	2	1	2	2	2	2	2	2
8722	2	160	51	18	0	0	3	2	4	2	5	2	2	2	2	2	1	2	2	1	3	2	2	2	2	2	2	2	2	2	2	2	3	2	2	1	1	2	2	2	2	2	2	2	2	2	2	2	2
8903	2	165	62	18	1	1	3	3	4	1	5	3	1	3	3	3	3	3	3	1	5	3	3	3	1	3	3	3	3	2	3	3	2	2	1	3	1	3	3	3	3	3	3	3	3	3	3	3	3
8411	2	153	49	18	0	0	3	2	2	1	8	3	2	3	2	2	1	1	2	1	3	2	2	2	2	1	2	2	2	2	2	2	2	2	1	2	1	2	2	2	2	2	1	1	2	2	2	2	1
8702	1	174	70	18	1	1	3	1	3	3	6	2	1	1	2	2	1	1	1	1	2	2	3	3	3	3	3	3	3	2	3	3	3	2	3	2	1	3	2	1	1	2	2	3	3	2	2	3	2
9308	1	176	78	18	1	1	3	2	3	2	6	2	4	1	2	1	1	1	1	1	1	2	2	2	2	2	2	2	2	2	2	2	3	1	1	1	1	3	2	1	1	2	2	1	2	2	2	2	2
10636	2	163	70	18	1	1	3	2	3	2	6	2	1	5	2	4	1	1	1	1	1	2	2	3	2	1	3	2	2	2	3	2	2	3	1	3	2	2	3	3	3	2	3	2	3	3	2	2	1
10129	2	160	60	18	1	1	3	2	3	2	6	2	3	5	3	1	1	1	5	1	5	3	3	3	1	3	3	3	3	3	3	3	3	3	3	2	1	3	3	3	2	3	1	3	3	3	3	3	3
7149	2	165	55	18	1	1	3	2	3	2	6	2	2	3	2	2	2	2	2	1	5	2	2	2	2	2	2	2	2	2	2	2	2	2	2	2	2	2	2	2	2	2	2	2	2	2	2	2	2
7097	2	167	54	18	0	1	3	2	3	2	6	2	3	2	2	1	1	1	1	1	5	2	2	2	2	2	2	2	2	2	2	2	2	2	2	2	1	2	2	2	2	2	1	2	2	2	2	2	2
5986	1	170	46	18	0	1	3	2	3	2	6	2	1	2	2	1	1	1	1	1	1	2	2	2	2	2	2	2	2	2	2	2	2	2	2	2	2	2	2	2	2	2	2	2	2	2	2	2	2
7505	2	163	45	18	0	1	3	2	3	2	6	4	3	4	2	1	1	1	1	1	3	3	3	3	1	2	3	3	3	1	3	3	3	3	1	2	1	2	3	3	3	3	1	3	3	3	2	3	3
7461	1	178	95	18	0	0	3	2	3	2	6	2	2	1	2	3	1	1	1	1	2	2	2	2	2	2	2	2	2	2	2	2	2	2	2	2	1	2	2	2	2	2	2	2	2	3	3	3	2
8278	2	158	75	18	1	0	3	2	3	2	6	3	2	4	3	1	1	1	1	1	3	3	3	3	2	2	3	2	3	2	3	3	2	3	1	3	1	2	3	2	3	3	2	2	3	2	3	3	2
10157	1	172	60	18	1	0	3	2	3	2	6	2	3	2	2	2	2	2	2	1	3	2	2	2	2	2	2	2	2	2	2	2	2	2	2	2	1	2	2	2	2	2	2	2	2	2	2	2	2
9047	2	162	60	18	0	0	3	2	3	2	6	2	4	1	2	1	1	1	1	1	1	2	2	2	2	2	2	2	2	3	2	2	3	2	2	1	1	2	3	1	2	2	1	2	2	2	2	2	2
10037	2	168	55	18	0	0	3	2	3	2	6	2	1	2	2	2	1	1	1	1	2	2	2	2	2	1	2	2	2	2	2	2	3	2	1	1	1	3	2	2	2	3	2	1	2	2	2	3	2
8257	2	156	45	18	0	0	3	2	3	2	6	4	3	4	2	1	1	1	1	1	3	3	2	3	1	2	3	2	3	2	3	3	3	3	2	3	1	3	3	3	3	3	1	3	3	3	3	3	3
8021	2	161	50	18	0	1	2	2	4	1	7	3	2	2	2	1	1	1	1	1	1	3	3	3	1	3	2	2	2	2	3	3	2	2	2	2	1	3	2	2	2	3	2	1	2	2	3	3	3
10371	1	174	65	18	0	0	3	3	3	1	6	1	2	3	2	2	2	2	2	2	4	1	1	1	3	1	1	1	1	3	1	1	3	1	1	1	1	3	1	1	1	1	1	1	1	1	1	1	1
7758	2	173	64	18	1	0	3	3	3	1	6	1	2	5	2	2	2	2	2	1	5	3	3	3	2	2	3	3	3	2	3	3	3	2	1	3	1	2	3	3	3	3	3	3	3	3	3	3	2
368	1	174	65	18	0	1	3	2	4	3	4	3	2	3	1	3	1	3	1	1	2	2	2	2	2	2	2	2	2	2	2	2	2	2	2	2	2	2	2	2	2	2	2	2	2	2	2	2	2
8339	2	165	58	18	0	0	3	2	2	2	7	3	2	3	2	2	1	1	1	1	2	2	2	2	2	1	2	2	2	2	2	2	2	2	1	2	1	2	1	2	2	2	1	1	2	2	2	2	2
7395	2	165	50	18	1	0	3	2	2	2	7	2	3	1	3	1	1	3	3	1	3	1	2	2	2	1	2	2	2	3	2	2	3	2	1	2	1	2	2	2	2	2	2	2	2	2	2	2	2
11185	1	170	60	18	1	1	4	3	4	4	1	4	2	4	3	2	2	2	2	2	2	2	2	2	2	2	2	2	2	2	2	2	2	2	2	2	2	2	2	2	2	2	2	2	2	2	2	2	2
10161	1	186	56	18	1	1	2	1	4	3	6	2	1	2	3	1	1	1	1	1	1	2	2	1	3	2	2	2	3	1	2	2	2	2	1	2	1	1	1	2	1	1	1	1	1	2	2	1	1
7889	1	178	81	18	1	1	3	2	3	3	5	2	4	3	3	1	2	2	2	2	1	2	2	2	2	2	2	2	2	2	2	2	2	2	2	2	2	2	2	2	2	2	2	2	2	2	2	2	2
10357	1	179	97	18	0	0	3	2	3	3	5	3	3	3	2	1	1	1	1	1	1	2	3	3	1	2	3	3	3	1	2	2	3	1	2	2	1	3	2	2	3	3	1	1	3	2	2	3	1
12504	2	162	48	18	1	0	3	2	3	3	5	3	4	2	3	1	1	1	1	1	1	2	3	3	2	2	2	3	3	3	2	2	3	2	2	2	1	3	2	2	2	3	2	2	2	2	2	2	2
2384	2	162	60	18	1	1	2	2	4	2	6	2	2	2	2	1	1	2	2	1	5	2	2	2	2	2	2	2	2	2	2	2	2	2	3	2	1	2	2	2	2	2	2	2	2	2	2	2	2
9280	1	176	86	18	0	1	3	3	3	2	5	2	1	4	3	1	1	1	1	1	1	3	3	3	3	3	3	3	3	3	3	3	3	3	3	3	1	3	2	2	1	3	1	3	3	3	3	3	1
6914	2	168	46	18	0	0	3	3	3	2	5	2	1	2	3	1	1	1	1	1	5	3	3	3	1	3	3	3	3	1	3	3	3	3	3	3	1	1	3	3	3	3	3	3	3	3	3	3	3
7947	2	168	115	18	0	1	2	2	3	2	7	4	1	4	2	1	1	1	1	1	3	2	2	3	2	2	2	3	3	2	3	3	2	2	2	2	1	3	3	2	2	3	1	3	3	3	3	3	3
9714	2	165	48	18	0	0	3	3	2	2	6	3	2	3	2	4	1	2	1	1	3	2	2	2	2	2	3	3	2	3	2	2	3	2	2	2	1	3	2	2	1	2	2	3	3	3	2	2	2
7372	2	167.8	49	18	0	0	2	1	4	4	5	3	1	3	2	1	1	1	1	1	3	3	3	3	2	2	3	3	3	2	3	3	1	3	2	3	1	2	3	3	2	2	3	3	3	3	3	3	3
9840	2	162	68	18	1	1	2	2	4	3	5	3	2	3	2	1	1	1	1	1	3	3	3	3	1	2	3	3	3	2	3	3	2	1	2	3	2	2	2	3	3	3	2	3	3	3	3	3	3
10170	2	170	87	18	1	1	3	3	3	3	4	2	2	1	2	1	1	1	1	1	1	2	2	2	2	2	2	2	2	2	2	2	2	2	2	2	2	2	2	2	2	2	2	2	2	2	2	2	2
8707	1	177	65	18	0	1	2	2	2	2	8	3	2	2	2	1	1	1	1	1	1	2	2	3	3	3	2	3	2	2	2	2	2	3	3	3	3	1	3	3	3	3	3	3	3	3	3	3	3
10483	2	165	63	18	0	1	2	2	2	2	8	2	1	3	2	3	2	2	2	1	1	2	2	2	1	2	2	3	2	3	3	3	3	2	2	2	1	2	2	2	2	3	2	2	2	2	2	2	1
8543	2	170	46	18	0	0	2	2	2	2	8	1	1	4	1	1	1	1	5	1	5	3	3	3	1	1	3	2	3	2	3	3	2	2	1	3	1	2	3	3	3	3	2	3	3	3	3	3	2
8217	2	165.5	63	18	1	0	2	4	3	1	6	3	3	4	2	1	1	1	1	1	3	3	2	3	1	1	3	2	2	2	2	2	2	2	2	2	1	2	2	3	3	2	1	2	2	3	2	2	2
7918	1	178	85	18	1	1	4	1	5	1	4	2	2	1	2	1	1	1	1	1	1	2	2	2	2	2	2	2	2	2	2	2	2	2	2	2	2	2	2	2	2	2	2	2	2	2	2	2	2
9966	1	175	65	18	0	1	4	1	4	1	5	2	2	2	2	2	2	2	2	2	2	2	2	2	2	2	2	2	2	2	2	2	2	2	2	2	1	2	2	1	2	2	2	2	2	2	2	2	2
7799	1	173	65	18	0	1	4	1	4	1	5	2	1	2	2	1	1	1	1	1	1	2	3	3	2	2	3	3	3	2	3	3	3	2	3	2	1	2	3	1	3	3	1	1	3	3	3	3	1
8219	1	175	80	18	0	0	4	1	4	1	5	4	4	2	2	1	1	1	1	1	1	2	3	3	2	2	3	2	2	2	3	3	3	2	3	2	1	1	3	2	3	3	2	2	2	3	3	3	3
7396	2	166	60	18	1	0	4	1	4	1	5	1	4	3	2	1	2	1	1	1	3	2	2	2	2	3	2	2	2	2	2	2	3	2	2	2	1	3	2	2	2	2	2	2	2	2	2	2	2
10462	2	166	60	18	0	0	4	1	4	1	5	3	3	4	3	1	1	1	1	1	3	2	3	3	1	1	2	2	2	2	2	3	3	2	3	2	1	3	3	2	2	3	2	3	3	3	3	3	1
8049	2	170	56.8	18	0	0	4	1	4	1	5	2	4	2	3	1	1	1	1	1	1	2	3	3	2	2	3	3	3	2	3	3	1	2	2	2	1	3	2	2	2	3	2	3	3	3	3	3	2
10702	1	177	68	18	1	1	4	1	3	1	6	3	2	3	3	3	5	5	2	1	2	2	2	2	2	2	2	2	2	2	2	2	2	2	2	2	2	2	2	2	2	2	2	2	2	2	2	2	2
10093	1	175	210	18	0	0	4	1	3	1	6	2	2	2	2	1	1	1	1	1	1	2	3	2	2	2	3	3	3	2	3	3	2	2	2	2	1	3	2	2	2	2	2	3	3	2	3	3	2
9050	2	160	70	18	0	0	4	1	3	1	6	2	1	1	2	1	1	1	1	1	1	3	3	3	1	3	3	3	3	3	3	3	3	1	2	1	1	3	3	3	3	3	3	3	3	3	3	3	3
7757	1	180	55	18	0	0	4	1	3	1	6	1	1	3	2	1	1	1	1	1	3	2	2	2	2	1	2	2	2	2	2	2	3	1	1	2	1	3	1	2	1	2	1	1	2	1	2	2	1
8612	2	158	52	18	1	0	4	1	3	1	6	2	1	2	2	1	1	1	1	1	1	2	3	3	3	3	2	2	3	3	3	3	3	1	1	1	1	3	3	1	2	3	1	2	3	1	3	3	1
6948	1	178	60	18	1	1	5	1	4	4	1	3	1	2	3	2	1	3	1	1	1	1	3	3	1	1	3	3	3	3	3	3	1	3	3	3	3	1	3	3	3	3	3	3	3	3	3	3	3
8572	2	165	75	18	0	1	3	1	4	1	6	2	2	2	2	1	1	1	1	1	5	3	3	3	1	3	3	3	3	2	3	3	2	2	2	2	3	3	3	2	2	3	3	3	3	2	2	2	2
7302	2	170	100	18	1	1	4	2	3	1	5	3	2	3	2	1	1	1	1	1	3	1	3	3	3	3	3	3	3	1	3	3	3	3	3	3	3	1	3	3	3	3	3	3	3	3	3	3	3
8239	2	174	60	18	0	0	4	2	3	1	5	3	1	3	3	2	2	2	2	1	3	3	3	3	2	2	3	2	3	2	3	3	3	2	2	2	1	2	2	2	2	3	1	2	3	2	2	3	2
10011	2	170	60	18	1	0	4	2	3	1	5	4	3	4	3	3	2	3	2	1	3	2	2	2	2	1	2	2	2	3	2	2	3	2	2	2	1	3	2	2	2	2	1	1	2	2	2	2	1
6882	2	164	47	18	0	0	4	2	3	1	5	2	2	3	3	1	1	2	1	1	5	2	2	2	1	2	3	3	3	1	3	3	3	1	1	2	1	2	2	2	2	3	3	3	3	2	2	2	2
9874	2	161	55	18	1	1	4	2	4	2	3	2	2	3	3	3	3	3	3	3	1	2	2	2	2	2	2	2	2	2	2	2	2	2	2	2	2	2	2	2	2	2	2	2	2	2	2	2	2
7236	2	175	61	18	0	0	3	1	3	1	7	3	2	3	2	2	2	3	2	1	5	2	2	2	2	2	2	2	2	2	2	2	3	2	2	2	1	2	2	2	2	2	1	1	2	3	2	2	2
7146	2	162	50	18	0	0	3	1	3	1	7	3	2	3	3	1	1	2	1	1	3	2	3	3	1	3	3	2	3	2	2	3	2	2	2	2	1	2	2	3	2	2	2	2	3	2	2	3	3
7456	2	150	50	18	0	0	3	1	3	1	7	3	3	2	2	2	1	3	1	1	4	2	2	2	2	3	3	2	2	2	2	3	1	2	2	2	2	2	2	3	2	3	2	2	2	2	2	2	2
8912	2	160	100	18	0	0	4	2	2	1	6	2	2	4	2	2	1	5	1	1	3	2	2	2	2	3	3	2	3	2	2	2	1	2	2	2	1	2	2	2	3	3	3	2	2	3	2	3	2
10164	2	170	66	18	1	1	3	1	4	2	5	2	1	2	1	1	1	1	1	1	2	2	2	3	2	2	3	2	2	2	3	3	3	2	3	1	1	3	3	2	2	3	3	3	3	3	3	3	3
8228	1	170	65	18	0	0	3	1	4	2	5	2	2	2	1	2	2	2	2	1	5	3	3	3	2	3	3	3	3	1	3	3	2	2	1	3	3	2	2	2	2	2	3	2	3	2	3	3	3
8980	2	175	70	18	1	1	4	2	3	2	4	2	1	2	2	1	1	1	1	1	1	3	2	2	2	1	1	2	3	2	2	2	2	1	1	1	1	2	2	2	2	2	1	1	1	3	1	2	2
10128	1	180	62	18	0	0	4	2	3	2	4	2	1	3	2	1	2	2	2	1	3	2	2	2	2	2	2	2	2	2	2	2	2	2	2	2	2	2	2	2	2	2	2	2	2	2	2	2	2
10675	2	170	68	18	0	0	3	1	3	2	6	4	2	2	2	1	1	1	1	1	5	2	2	2	2	2	2	2	2	2	2	2	2	2	1	2	3	3	2	3	2	2	2	2	2	2	2	2	1
10471	2	161	57.5	18	0	1	2	1	4	1	7	2	2	2	2	1	1	1	1	1	3	2	2	2	2	1	2	2	2	2	2	2	1	2	1	2	1	3	1	2	2	2	1	1	1	2	2	2	1
8688	1	173	52	18	1	1	4	2	2	2	5	2	1	1	2	1	1	1	1	1	1	2	2	2	2	2	2	2	2	2	2	2	2	2	2	2	2	2	2	2	2	2	2	2	2	2	2	2	2
9806	2	155	54	18	0	0	4	4	4	1	2	2	2	2	2	3	3	3	3	3	3	2	2	2	2	2	2	2	2	2	2	2	2	2	2	2	2	2	2	2	2	2	2	2	2	2	2	2	2
7746	2	165	53	18	0	1	3	2	3	1	6	3	3	2	2	1	1	1	1	1	1	2	3	3	2	2	3	3	3	1	3	3	2	1	1	2	1	3	2	3	3	2	3	2	3	3	3	3	2
9432	2	161	48	18	1	1	3	2	3	1	6	2	1	2	2	2	2	2	2	1	3	2	2	2	3	1	3	3	2	2	3	3	1	2	1	3	1	3	2	2	2	3	1	2	2	3	2	2	2
7110	2	162	65	18	0	0	3	2	3	1	6	2	1	3	2	2	2	2	2	1	1	2	3	3	2	2	2	2	2	2	2	2	2	2	2	2	2	2	2	2	2	2	2	2	2	2	2	2	2
10453	2	163	58	18	0	0	3	2	3	1	6	2	1	1	2	1	1	1	1	1	1	2	3	2	2	2	3	2	3	2	2	3	2	1	2	2	1	2	2	3	2	3	3	2	2	3	2	3	2
9249	2	168	56	18	1	0	3	2	3	1	6	3	3	3	2	1	1	1	1	1	2	2	2	2	2	2	2	2	2	3	2	2	3	2	1	2	1	3	2	2	2	2	1	2	2	2	2	2	2
10363	2	155	45	18	0	0	3	2	3	1	6	1	2	5	2	3	3	3	3	3	4	2	2	2	2	2	2	2	2	2	2	2	3	3	3	3	2	2	3	3	3	3	2	3	3	3	3	3	1
9931	2	153	43	18	0	0	3	2	3	1	6	3	3	3	3	3	1	4	1	1	3	2	3	2	2	1	1	2	2	1	2	1	2	2	1	3	1	3	1	2	2	2	2	1	2	1	1	2	1
10259	1	182	184	18	0	1	3	2	2	1	7	2	1	2	2	1	1	1	1	1	1	2	2	3	2	2	2	3	2	2	3	3	3	2	3	2	1	2	3	2	3	3	2	2	3	2	2	2	2
8431	1	175	75	18	0	0	3	2	2	1	7	2	2	1	2	1	1	1	1	1	3	2	2	3	2	2	3	2	2	2	2	3	2	2	1	2	1	2	1	3	2	3	1	2	3	2	2	3	1
10571	2	169	56	18	0	0	3	2	2	1	7	3	3	3	3	4	2	4	4	1	3	3	3	3	2	2	3	2	2	2	3	2	2	2	2	2	1	3	3	3	2	3	1	3	3	3	3	3	1
8817	1	177	52	18	0	0	3	2	2	1	7	2	2	3	3	2	1	2	2	1	2	3	3	3	2	3	3	3	3	1	3	3	1	3	1	3	3	1	3	3	2	3	1	3	3	1	3	3	3
8739	1	192	117	18	1	1	3	2	3	2	5	5	4	5	4	1	1	1	1	1	2	3	3	3	1	3	3	3	3	1	3	3	1	1	1	1	1	1	3	3	3	3	3	3	3	3	2	2	2
8403	1	172	80	18	0	1	3	2	3	2	5	3	3	2	3	2	2	1	2	1	4	2	3	3	2	3	3	2	3	1	3	3	2	3	3	3	1	2	3	3	2	3	2	3	3	3	3	3	3
9338	2	161	46	18	0	1	3	2	3	2	5	3	3	1	2	2	2	2	2	2	2	2	2	2	2	3	3	2	3	2	2	2	3	2	2	1	1	3	2	2	2	3	1	3	2	3	2	3	3
8161	1	171	87.5	18	1	0	3	2	3	2	5	5	5	5	3	5	5	5	5	1	5	3	3	3	3	3	3	3	3	3	3	3	3	3	3	3	2	1	3	1	3	3	2	3	3	3	3	3	3
7199	1	182	75	18	1	0	3	2	3	2	5	2	2	3	2	2	1	4	1	1	4	3	3	3	1	3	3	3	3	1	3	3	2	3	3	3	2	2	3	3	3	3	2	3	3	3	3	3	3
7572	2	168	62	18	0	0	3	2	3	2	5	2	1	4	2	1	1	1	2	1	2	1	3	3	2	2	2	2	3	1	3	2	2	3	2	3	1	2	2	2	2	3	1	2	2	2	2	2	2
8732	2	160	60	18	0	0	3	2	3	2	5	3	4	1	2	1	2	2	2	1	5	1	1	2	2	2	1	2	2	3	2	2	3	1	1	1	1	3	1	1	1	2	2	2	2	2	2	2	2
10592	2	164	55	18	0	0	3	2	3	2	5	2	4	2	2	1	1	1	1	1	1	2	2	2	2	2	2	2	2	2	2	2	2	2	2	2	2	2	2	2	2	2	2	2	2	2	2	2	2
9837	1	165	54	18	0	0	3	2	3	2	5	2	2	3	3	1	1	1	1	1	2	3	3	3	3	3	2	3	2	2	3	3	3	2	2	2	2	3	3	2	2	2	2	2	3	3	3	3	2
8472	2	161.3	52	18	0	0	3	2	3	2	5	5	2	3	3	3	1	1	1	1	3	2	2	2	3	3	2	3	3	2	3	3	2	2	1	2	1	2	2	2	2	2	2	2	2	2	2	3	2
9719	2	160	42	18	1	1	3	3	3	1	5	2	3	3	2	3	3	3	3	3	3	2	2	2	2	2	2	2	2	2	2	2	2	2	2	2	2	2	2	2	2	2	2	2	2	2	2	2	2
10351	1	170	60	18	1	1	2	2	5	2	4	5	5	1	3	1	1	1	1	1	3	3	3	3	1	2	3	3	3	3	3	3	1	3	2	2	1	1	3	3	3	3	3	3	3	3	3	3	3
7113	2	165	58	18	0	1	3	2	2	2	6	2	4	2	2	1	2	2	1	1	3	2	2	2	3	1	3	2	3	2	3	3	3	3	1	3	1	3	3	3	3	3	1	2	3	3	3	3	1
7721	2	160	114	18	0	0	3	2	2	2	6	1	2	3	2	2	1	1	1	1	3	2	1	3	1	1	3	2	3	2	2	3	2	3	3	2	1	3	3	3	3	3	2	3	3	3	2	3	1
10461	1	187	70	18	0	0	3	2	2	2	6	3	2	1	2	1	1	2	1	1	2	2	3	2	2	3	2	3	3	3	3	3	3	2	2	1	1	3	2	1	2	2	1	1	3	2	2	2	2
8454	2	155	50	18	0	0	3	2	2	2	6	2	1	2	2	1	1	3	3	1	3	2	2	2	2	2	2	2	2	2	2	2	2	2	2	2	2	2	3	2	2	3	2	2	3	2	3	3	2
7122	2	160	48	18	0	0	3	2	2	2	6	3	2	1	3	1	1	3	1	1	3	2	2	2	1	2	3	2	2	2	2	2	2	1	2	1	1	3	1	2	2	2	1	1	2	2	2	2	2
8357	2	155	52	18	0	0	2	1	1	1	10	3	3	3	3	3	1	2	4	1	5	2	2	2	2	1	3	2	2	2	2	2	2	2	1	2	1	2	2	2	2	2	1	2	2	3	1	1	2
7845	2	155	40	18	0	0	4	4	1	1	5	2	1	2	2	1	1	1	1	1	5	1	3	3	1	3	3	3	3	1	3	3	2	3	3	2	2	3	2	2	2	2	2	2	2	2	2	2	2
8091	2	164	110	18	1	0	2	2	2	2	7	2	1	4	3	3	3	3	1	1	3	2	2	2	2	2	2	2	2	2	2	2	2	2	2	2	2	2	2	2	2	2	2	2	2	2	2	2	2
8311	1	170	82	18	0	0	2	2	2	2	7	2	2	2	2	2	1	1	1	1	5	2	2	3	1	2	3	2	2	2	2	2	1	2	2	3	1	2	2	3	2	3	3	2	2	3	3	3	2
9754	1	181	67	18	0	0	2	2	2	2	7	3	1	2	2	1	1	1	1	1	3	2	2	2	2	2	2	2	2	2	2	2	2	2	2	2	2	2	2	2	2	2	2	2	2	2	2	2	2
9246	1	182	78	18	1	1	2	1	4	5	3	5	5	5	5	5	5	5	5	5	3	3	3	3	1	3	3	3	3	1	3	3	1	3	3	3	3	1	3	3	3	3	3	3	3	3	3	3	3
7390	2	165	62	18	0	0	2	3	3	3	4	3	2	1	2	2	2	2	2	1	5	2	2	2	2	2	2	2	2	2	2	2	2	2	2	2	2	2	2	2	2	2	2	2	2	2	2	2	2
9916	2	164	66	18	1	0	4	1	5	1	3	2	1	3	2	2	2	2	2	2	1	2	2	2	2	2	2	2	2	2	2	2	2	2	2	2	2	2	2	2	2	2	2	2	2	2	2	2	2
8731	1	181	57	18	1	1	4	1	4	1	4	2	1	1	2	2	1	1	1	1	3	3	3	3	1	3	3	3	3	1	3	3	2	2	1	3	1	3	2	2	3	2	3	2	1	3	3	3	1
9292	1	178	57	18	1	1	4	1	4	1	4	1	3	5	3	1	1	1	1	1	1	1	1	1	3	1	1	2	2	1	3	3	3	2	2	2	2	3	1	1	2	2	2	2	3	2	2	3	3
7544	1	180	90	18	0	0	4	1	4	1	4	5	3	2	3	2	1	1	1	1	3	2	2	3	3	2	3	3	3	1	3	3	3	3	1	3	3	3	2	3	3	3	3	3	3	3	3	3	3
9781	2	167	60	18	0	1	4	1	3	1	5	2	3	4	2	1	2	1	4	1	1	2	2	2	2	2	2	2	2	2	2	2	2	2	2	2	2	2	2	2	2	2	2	2	2	2	2	2	2
9728	1	178	70	18	0	0	4	1	3	1	5	2	1	1	2	1	1	1	1	1	1	2	2	3	2	1	2	2	3	3	2	2	3	1	2	2	1	3	2	2	2	2	1	2	3	2	2	3	2
7915	2	170	70	18	0	0	4	1	3	1	5	3	2	2	2	2	1	1	1	1	2	3	2	3	2	2	3	2	2	2	2	2	2	1	2	2	2	2	2	2	2	2	2	2	2	2	2	2	1
8491	2	160	45	18	0	0	4	1	3	1	5	3	2	3	2	1	1	1	1	1	1	3	3	3	2	2	3	3	2	1	3	3	3	2	1	3	2	3	3	1	3	2	3	2	2	3	3	3	2
6846	1	177	105	18	1	0	4	1	2	1	6	2	1	2	2	1	1	1	1	1	1	2	2	2	2	2	2	2	2	2	2	2	2	2	2	2	2	2	2	2	2	2	2	2	2	2	2	2	2
7279	2	165	58	18	0	0	4	1	2	1	6	2	1	3	2	2	3	3	1	1	2	2	2	1	3	3	2	3	3	2	2	2	3	1	1	2	1	3	2	1	2	3	1	1	2	2	2	3	1
8072	2	170	58	18	1	1	4	2	5	2	1	1	1	3	3	1	1	1	1	1	2	3	3	3	2	3	3	3	3	1	3	3	1	3	3	3	3	2	3	3	2	2	3	3	3	2	2	2	3
8356	2	163	72	18	0	1	3	1	4	1	5	4	2	4	3	1	1	2	1	1	3	2	3	2	1	2	2	2	3	2	2	2	3	2	1	2	1	2	2	2	3	3	1	2	3	3	2	2	1
8291	2	165	50	18	0	0	3	1	4	1	5	2	2	2	2	1	1	1	1	1	2	2	3	2	2	2	2	2	2	2	2	2	2	2	2	2	2	2	2	2	2	2	2	2	2	2	2	2	2
12112	2	155	45	18	0	0	3	1	4	1	5	2	1	2	3	1	1	1	1	1	3	2	2	2	2	2	2	2	2	2	2	2	2	2	2	2	2	2	2	2	2	2	2	2	2	2	2	2	2
7592	2	152	42	18	0	0	3	1	4	1	5	4	5	3	3	3	3	3	2	1	3	2	2	2	2	2	2	2	2	2	2	2	2	2	2	2	2	2	2	2	2	2	2	2	2	2	2	2	2
9836	1	172	58	18	1	1	4	2	3	1	4	2	4	2	2	1	1	1	1	1	1	1	2	2	2	2	2	3	3	2	3	2	2	1	2	1	1	3	2	1	2	2	2	2	2	2	2	2	2
7676	1	186	107	18	1	0	4	2	3	1	4	1	1	1	1	2	2	2	2	2	1	1	1	1	3	2	2	2	2	2	2	2	2	2	2	2	2	2	2	2	2	2	2	2	2	2	2	2	2
9842	1	175	68	18	1	0	4	2	3	1	4	3	4	3	2	1	1	2	1	1	2	2	2	2	2	2	2	2	2	2	2	2	2	2	2	2	2	2	2	2	2	2	2	2	2	2	2	2	2
10224	1	181	70	18	0	1	3	1	3	1	6	3	3	3	3	4	4	4	4	4	3	2	2	2	2	1	1	1	1	2	1	3	1	2	1	2	2	2	2	2	2	2	2	2	2	3	3	3	3
8532	1	170	70	18	0	1	3	1	3	1	6	5	4	3	3	4	4	4	4	4	3	2	2	2	2	2	2	2	2	2	2	2	2	2	2	2	2	2	2	2	2	2	2	2	2	2	2	2	2
7610	1	183	85	18	0	0	3	1	3	1	6	2	5	1	2	1	1	1	1	1	2	2	2	2	2	2	2	2	2	2	2	2	2	2	2	2	2	2	2	2	2	2	2	2	2	2	2	2	2
9501	2	155.9	60	18	1	0	3	1	3	1	6	3	1	1	3	1	1	1	1	1	5	2	2	1	2	1	2	2	2	1	3	2	2	3	1	3	1	3	1	3	2	3	1	1	2	1	1	1	1
7222	2	171	58	18	0	0	3	1	3	1	6	2	2	4	2	2	2	2	4	1	2	2	2	2	3	1	2	2	2	2	2	2	3	2	2	2	1	3	2	2	2	3	1	1	2	2	2	2	2
8977	1	163	58	18	0	0	3	1	3	1	6	3	2	3	3	1	1	1	1	1	5	1	1	2	3	1	1	2	2	2	2	2	2	2	2	2	2	2	2	2	2	2	2	2	3	3	2	2	1
6942	2	160	48	18	0	0	3	1	3	1	6	5	5	5	3	5	5	2	2	2	5	1	2	2	3	3	2	3	3	2	2	2	2	2	2	2	1	3	1	1	1	3	2	2	2	2	2	2	2
9977	2	153	48	18	1	0	3	1	3	1	6	3	2	1	2	1	1	1	1	1	2	3	3	2	2	3	3	3	3	1	3	3	3	1	1	3	1	2	3	3	3	3	3	3	3	2	2	3	1
10692	2	165	60	18	0	0	3	1	4	2	4	2	2	2	2	2	1	4	1	1	2	3	3	3	1	3	3	2	3	2	3	3	2	1	3	2	1	2	3	3	2	3	3	3	3	3	3	3	1
833	2	167	110	18	1	1	4	2	3	2	3	2	2	3	2	2	2	3	2	1	2	2	2	3	2	2	3	2	2	2	2	2	2	2	3	3	2	2	3	2	2	1	2	2	2	2	2	2	3
7117	2	158	62	18	0	0	4	2	3	2	3	3	3	3	2	3	2	3	2	1	5	2	2	2	2	2	2	2	2	2	2	2	2	2	2	2	2	2	2	2	2	2	2	2	3	2	2	3	2
9919	2	160	90	18	0	0	3	2	4	1	4	2	1	3	2	2	1	1	1	1	3	2	3	3	1	2	3	3	3	2	3	3	3	2	1	2	1	3	2	2	3	3	2	2	3	2	2	3	1
10383	2	173	65	18	0	1	3	1	2	1	7	2	4	3	2	1	1	1	1	1	1	1	3	3	3	1	3	1	3	3	3	3	1	1	3	3	1	3	3	1	1	1	3	1	3	3	3	3	3
10001	2	153.5	95	18	0	0	3	1	2	1	7	3	2	4	3	2	1	1	3	1	3	2	2	3	2	2	2	2	2	1	2	2	2	2	2	3	1	3	1	2	2	2	1	2	2	2	2	2	1
8343	2	164.3	77	18	0	0	3	1	2	1	7	3	2	2	2	1	1	2	1	1	3	3	3	3	1	3	3	3	3	2	3	3	2	2	1	2	1	2	2	2	2	2	2	2	2	2	2	2	2
8309	2	166	66	18	0	0	3	1	2	1	7	2	2	4	2	1	1	4	1	1	3	3	3	3	1	3	3	3	3	3	3	3	3	1	1	1	1	3	1	1	1	3	1	1	1	1	1	2	2
10270	1	173	60	18	0	0	3	1	2	1	7	2	2	3	3	1	1	1	1	1	2	2	2	2	2	2	2	1	1	2	2	3	2	2	1	2	1	3	2	1	2	2	1	2	2	3	2	2	2
10346	1	175	58	18	0	0	3	1	2	1	7	5	3	3	3	1	1	1	1	1	3	1	1	1	3	1	2	2	2	3	3	3	1	1	2	3	1	1	1	2	3	1	2	3	1	3	2	1	2
10234	2	167	65	18	1	0	3	1	3	2	5	2	2	1	2	1	2	2	3	1	3	2	2	2	3	2	2	2	2	2	2	2	2	2	2	2	1	2	2	2	2	2	2	2	2	2	2	2	2
7335	2	158	88	18	0	0	4	2	2	2	4	2	2	3	2	1	2	1	1	1	5	2	2	2	3	1	2	2	2	2	2	2	3	2	1	2	1	2	2	2	2	2	1	1	2	2	2	2	2
7290	2	165	55	18	1	1	3	2	3	1	5	4	2	5	3	4	1	3	2	1	5	2	2	2	1	1	3	2	3	2	3	3	2	2	3	3	1	2	2	3	3	3	1	2	3	3	3	3	3
9612	2	159	51	18	0	1	3	2	3	1	5	5	5	5	4	1	1	3	1	1	5	2	2	1	2	2	2	2	2	2	2	2	2	2	2	2	2	2	2	2	2	2	2	2	2	2	2	2	2
10395	2	165	105	18	0	0	3	2	2	1	6	3	1	3	2	1	1	1	2	1	5	3	3	3	1	2	3	3	3	2	3	3	3	2	2	3	1	2	3	2	3	3	2	3	3	3	3	3	2
7645	2	172	70	18	1	0	3	2	2	1	6	2	2	3	2	1	3	3	3	2	5	3	3	3	1	3	3	3	3	2	3	3	2	3	3	3	2	2	3	3	2	2	1	2	3	3	3	3	2
8041	2	161	52	18	0	0	3	2	2	1	6	2	3	1	2	3	2	3	5	1	5	2	2	2	2	2	3	3	2	3	2	2	3	2	2	2	1	3	2	2	2	3	2	3	3	3	3	3	2
8094	1	179	65	18	1	1	3	2	3	2	4	2	1	1	2	1	1	1	1	1	1	3	3	3	1	3	3	3	3	1	3	3	3	1	3	1	1	3	3	1	3	3	1	3	3	3	3	3	3
6952	2	159	51	18	0	1	3	2	3	2	4	2	1	3	2	1	1	1	1	1	3	2	2	2	3	2	2	2	2	2	2	2	3	2	2	2	1	3	2	2	2	2	1	2	2	2	2	2	2
8517	2	170	46	18	1	1	3	2	3	2	4	2	1	3	2	3	3	3	3	1	1	3	3	3	1	3	3	3	3	2	2	2	2	2	2	2	2	2	2	2	2	2	2	2	2	2	2	2	2
10372	1	178	85	18	0	0	3	2	3	2	4	4	3	4	3	1	4	4	1	1	3	2	3	3	2	2	3	3	2	2	3	3	2	3	2	3	2	2	3	2	3	2	2	3	3	3	2	3	3
7283	2	160	45	18	0	0	3	2	3	2	4	3	2	4	3	3	2	2	4	1	3	2	2	2	2	2	2	2	2	2	2	2	3	2	2	2	2	2	3	2	2	3	2	2	2	2	2	2	2
8429	2	157.8	44.7	18	0	0	3	2	3	2	4	2	1	3	2	2	2	4	2	1	3	2	3	2	2	3	2	2	3	3	3	3	3	1	1	2	1	3	2	1	2	3	2	3	3	2	3	3	2
9605	2	166	52	18	0	0	3	3	3	1	4	2	2	3	2	3	3	2	1	1	5	3	3	3	1	3	3	3	3	2	3	3	3	2	1	2	1	2	2	2	2	3	3	2	2	2	3	2	2
7996	2	165	56	18	0	0	3	2	1	1	7	2	1	2	2	1	1	1	1	1	5	2	2	2	2	2	2	3	3	2	2	2	2	1	1	2	1	2	2	2	2	3	1	2	2	2	2	2	2
7983	1	175	67	18	0	0	3	1	2	3	5	2	1	4	1	1	4	2	1	1	5	3	3	3	2	2	3	3	2	3	3	3	3	2	3	3	2	2	3	3	3	2	2	3	3	3	3	3	3
10635	1	175	65	18	0	0	3	2	2	2	5	4	2	2	2	2	2	2	2	2	2	2	2	2	2	2	2	2	2	2	2	2	2	2	2	2	2	2	2	2	2	2	2	2	2	2	2	2	2
9743	1	170	64	18	0	0	3	2	2	2	5	2	2	2	2	1	1	1	1	1	1	1	1	1	3	3	3	3	3	1	3	3	1	3	3	3	3	1	3	3	3	3	3	3	3	3	3	3	3
7327	1	170	54	18	1	1	3	3	2	1	5	2	2	1	2	1	1	1	1	1	3	2	2	2	3	2	2	3	3	2	2	2	2	2	2	2	1	3	2	2	2	3	2	3	3	2	2	2	2
8330	1	168	120	18	0	0	3	3	2	1	5	3	3	4	3	5	1	2	1	1	3	2	2	2	1	1	2	2	2	3	2	2	3	3	1	2	1	3	2	3	3	2	1	3	3	3	3	3	1
7966	2	171	60	18	0	1	2	2	3	2	5	2	1	1	2	1	1	1	1	1	3	2	2	3	1	3	3	2	2	2	2	3	3	1	2	2	1	3	2	2	3	2	2	2	2	2	2	2	2
10456	1	173	55	18	0	0	2	2	3	2	5	2	1	1	2	2	2	1	1	1	3	2	2	2	1	2	2	2	2	1	3	3	2	2	2	2	1	2	2	2	2	2	2	2	2	2	2	2	2
6888	1	177	62	18	0	1	3	4	3	2	2	5	3	3	2	3	2	3	2	3	3	2	1	2	3	2	3	2	3	2	3	2	3	3	2	3	2	1	2	2	3	2	2	3	2	2	2	2	2
8290	2	178	75	18	0	1	2	2	2	2	6	2	1	2	2	2	2	2	2	1	3	2	3	3	2	3	3	3	2	2	3	3	3	2	3	2	1	2	2	2	3	2	1	2	3	2	3	3	3
7473	2	166	51	18	0	0	2	2	2	2	6	1	1	2	2	1	1	1	1	1	3	2	2	2	1	2	3	3	3	1	3	3	3	2	1	3	1	3	2	3	3	3	2	2	3	3	2	3	1
7058	2	164	48	18	0	0	2	2	2	2	6	4	2	4	2	2	1	1	1	1	1	3	3	3	2	2	2	2	2	2	2	2	3	2	2	2	1	3	2	1	2	2	2	2	2	2	2	2	2
8670	1	170	80	18	1	1	3	4	3	3	1	3	3	2	2	2	2	2	2	1	3	2	2	2	2	2	2	2	2	2	2	2	2	2	2	2	2	2	2	2	2	2	2	2	2	2	2	2	2
8054	1	175	85	18	0	0	2	3	2	2	5	2	2	1	2	1	1	1	1	1	1	2	2	2	2	2	2	2	2	2	2	2	2	2	2	2	2	2	2	2	2	2	2	2	2	2	2	2	2
8820	1	173	62	18	1	0	5	1	3	1	3	4	4	3	2	1	2	3	2	1	5	2	2	2	2	2	2	2	2	2	2	2	2	2	2	2	2	2	2	2	2	2	2	2	2	2	2	2	2
7931	2	168	65	18	1	0	5	2	4	1	1	5	5	3	4	4	4	4	4	1	3	2	2	3	2	2	3	3	3	3	3	3	2	3	3	3	2	3	3	2	1	2	2	3	3	3	3	3	3
8073	2	167	52	18	0	0	4	1	4	1	3	2	1	3	2	3	2	3	2	3	3	2	2	1	2	2	2	2	2	3	2	2	1	2	2	3	3	2	2	2	2	2	3	2	2	2	3	2	2
9947	2	175	90	18	1	1	4	1	3	1	4	3	3	4	2	1	2	1	2	1	1	2	3	2	1	2	3	2	3	2	3	2	1	2	3	2	3	1	3	1	2	3	2	3	2	3	2	2	2
7001	1	182	79	18	0	1	4	1	3	1	4	1	1	1	2	1	1	1	1	1	1	1	1	1	3	1	1	1	1	3	1	1	3	1	1	1	1	3	1	1	1	1	1	1	1	1	1	1	1
9905	2	156	49	18	1	0	4	1	3	1	4	3	1	4	2	3	1	3	1	1	5	1	2	2	2	2	3	3	3	2	3	3	2	2	3	3	1	2	2	3	3	3	2	2	3	3	2	2	2
7220	2	158	49	18	0	0	4	1	2	1	5	3	3	4	3	1	1	3	1	1	1	2	3	3	3	1	2	2	2	2	3	3	2	2	3	3	1	2	3	2	2	2	3	3	3	2	2	2	1
8617	2	157	49	18	0	0	4	1	2	1	5	4	3	4	2	4	1	1	2	1	3	3	3	3	1	3	3	3	3	1	3	3	1	3	2	2	1	2	3	2	2	2	1	2	3	2	3	3	3
9238	1	170	80	18	0	1	3	1	4	1	4	3	1	1	1	1	1	1	1	1	1	1	1	1	3	1	1	1	1	3	1	1	3	1	3	1	1	2	1	1	2	3	3	2	2	2	2	3	3
9640	2	160	56	18	0	1	3	1	4	1	4	3	2	5	3	1	1	1	1	1	3	1	2	3	1	2	3	1	1	3	1	1	2	1	1	1	1	3	1	1	2	3	1	1	2	2	2	2	1
10089	1	172	54	18	0	0	4	2	4	2	1	3	3	4	3	2	2	2	2	2	3	2	2	2	2	2	2	2	2	2	2	2	2	2	2	2	2	2	2	2	2	2	2	2	2	2	2	2	2
6941	1	180	75	18	0	1	3	1	3	1	5	2	2	1	2	1	1	1	1	1	2	2	3	2	1	1	3	2	3	2	2	2	3	3	1	2	1	3	2	3	2	1	1	3	2	2	2	2	2
8475	1	184	69	18	0	1	3	1	3	1	5	2	2	3	2	1	2	3	1	1	1	2	2	2	3	2	2	3	3	2	3	3	3	2	2	2	1	2	2	2	2	3	2	2	2	3	2	2	2
8384	2	160	56	18	1	1	3	1	3	1	5	3	2	3	2	1	1	1	2	1	3	3	3	3	2	2	3	3	3	3	3	3	3	2	2	1	1	2	2	2	3	2	1	2	2	3	3	3	2
9897	2	160	51	18	1	1	3	1	3	1	5	3	2	2	3	3	2	2	1	2	3	2	2	2	2	2	2	3	3	2	3	2	2	2	1	2	1	2	2	1	2	2	1	1	2	3	3	3	2
10042	2	168	70	18	0	0	3	1	3	1	5	2	2	1	3	1	1	2	1	1	3	2	3	3	2	2	2	2	2	2	2	2	2	2	1	2	1	2	2	2	2	2	2	2	2	2	2	2	1
10632	1	181	68	18	0	0	3	1	3	1	5	2	4	1	2	1	1	1	1	1	1	1	2	2	2	2	1	2	2	2	1	2	2	2	1	1	2	2	1	2	1	2	1	2	1	2	1	2	1
8704	1	175	65	18	0	0	3	1	3	1	5	3	2	2	3	1	1	1	1	1	1	2	2	2	2	2	2	2	2	2	2	2	3	2	2	2	1	2	2	2	2	2	1	2	2	2	2	2	2
8620	2	165	60	18	0	0	3	1	3	1	5	3	2	3	2	2	1	1	1	1	1	2	3	3	2	2	2	2	2	3	2	2	2	2	3	2	1	2	2	2	3	3	2	2	3	2	3	3	2
8531	2	172	56	18	0	0	3	1	3	1	5	2	2	5	2	2	2	2	1	1	2	2	2	2	2	2	2	2	2	2	2	2	3	2	2	2	1	2	2	2	2	2	1	2	2	2	2	2	2
8232	2	165	56	18	0	0	3	1	3	1	5	2	2	1	2	1	1	1	1	1	2	1	3	3	1	2	3	2	3	2	3	3	3	2	1	1	1	3	3	2	2	3	2	3	2	3	2	3	2
10699	2	168	55	18	0	0	3	1	3	1	5	2	1	2	2	1	1	1	1	1	2	2	2	2	3	2	2	2	2	2	2	2	2	1	2	2	1	2	2	2	2	3	2	2	2	2	2	2	2
8502	2	155	55	18	1	0	3	1	3	1	5	2	1	2	2	1	1	1	1	1	1	2	2	3	2	2	2	2	2	2	2	3	3	1	2	1	1	2	2	1	3	3	2	2	2	2	2	2	2
7088	2	153	54	18	0	0	3	1	3	1	5	2	4	3	2	2	1	2	1	1	3	2	2	3	1	3	3	2	2	2	2	2	3	2	2	3	1	3	1	2	2	2	3	3	2	2	1	1	1
10373	2	166	52	18	0	0	3	1	3	1	5	4	5	1	2	4	1	3	1	1	5	3	3	1	2	1	3	3	3	2	2	2	2	2	2	2	2	2	2	2	2	2	2	2	2	3	2	3	2
8476	1	177	50	18	0	0	3	1	3	1	5	2	1	2	3	2	1	1	1	1	2	3	3	3	1	3	3	3	3	3	3	3	3	2	3	3	1	3	2	2	3	3	2	3	3	3	3	3	3
9113	2	162	48	18	0	0	3	1	3	1	5	4	1	3	2	3	3	3	3	3	3	3	3	3	1	3	3	3	3	1	3	3	1	3	3	3	3	2	2	2	2	2	2	2	2	2	2	2	2
8607	2	156	47	18	0	0	3	1	3	1	5	3	3	3	2	2	4	1	4	1	3	3	3	3	1	2	3	3	3	3	3	3	3	2	1	3	1	3	3	2	3	3	2	3	3	3	3	3	2
10475	2	164	54	18	0	0	4	2	2	1	4	2	2	3	2	2	2	2	1	1	1	2	2	2	2	1	2	2	2	2	2	2	2	1	1	1	1	3	2	2	2	2	1	2	2	2	2	2	2
6911	2	176	75	18	1	1	3	2	3	1	4	2	2	3	2	1	1	1	1	1	1	3	3	1	1	1	3	3	3	2	3	3	3	1	3	3	1	3	3	3	3	3	3	3	3	3	2	3	1
8695	2	162	52	18	0	1	3	2	3	1	4	2	1	2	2	1	5	1	1	1	3	2	2	2	2	2	2	3	3	3	3	3	3	2	2	2	1	2	2	2	2	3	2	2	3	3	3	3	1
9992	2	160	70	18	0	0	3	1	1	1	7	2	1	2	2	2	2	1	1	1	1	2	3	3	1	2	3	3	3	2	3	3	2	2	3	2	2	3	3	2	3	2	3	2	2	3	3	3	3
6908	2	155	44	18	0	1	3	1	2	2	5	3	1	3	2	1	1	1	1	1	5	1	2	2	3	2	2	2	2	2	2	2	3	2	2	2	1	2	2	1	1	2	1	2	2	2	2	2	2
10599	1	170	85	18	1	0	2	1	3	1	6	2	2	3	2	3	3	3	3	3	3	2	2	2	2	2	2	2	2	2	2	2	2	2	2	2	2	2	2	2	2	2	2	2	2	2	2	2	2
10600	1	170	85	18	1	0	2	1	3	1	6	2	2	3	2	3	3	3	3	3	3	2	2	2	2	2	2	2	2	2	2	2	2	2	2	2	2	2	2	2	2	2	2	2	2	2	2	2	2
8972	2	160	53	18	0	0	2	1	3	1	6	3	2	4	3	3	3	2	1	1	4	3	2	2	3	2	2	2	2	2	2	2	3	1	3	3	1	3	3	1	2	2	1	2	1	3	2	2	1
8303	1	181	67	18	0	1	3	2	2	1	5	2	2	2	2	1	1	2	1	1	3	2	2	3	2	3	3	2	3	2	3	3	3	2	2	2	2	2	2	2	3	3	2	2	3	2	2	3	2
9825	1	180	105	18	0	0	3	2	2	1	5	2	4	1	2	1	1	1	1	1	1	2	2	2	2	2	2	2	2	2	2	2	3	2	2	2	2	2	2	2	2	2	2	2	2	2	2	2	2
9101	2	155	61.5	18	0	0	3	2	2	1	5	3	4	3	3	1	2	1	1	1	1	2	2	2	2	1	2	2	2	2	2	2	3	2	1	2	2	2	2	2	2	2	2	2	2	2	2	2	2
7730	2	161	55	18	0	1	3	2	3	2	3	2	1	2	2	1	1	1	1	1	3	2	2	3	2	2	3	2	2	2	2	2	3	2	2	2	1	3	2	2	2	2	2	2	2	2	2	2	2
9006	1	173	55	18	0	0	3	2	3	2	3	4	2	4	3	2	5	2	2	1	5	2	3	3	2	1	3	2	2	2	2	2	3	2	3	2	1	3	2	1	1	3	1	2	2	3	3	3	2
8393	1	171	55	18	0	0	3	2	3	2	3	3	2	3	3	2	3	2	2	3	5	2	2	2	1	1	3	2	2	1	3	2	2	2	2	3	2	2	2	2	1	2	3	2	2	2	2	2	2
7577	2	170	45	18	0	0	3	2	3	2	3	3	3	3	3	3	1	1	1	1	5	2	2	2	2	3	3	3	3	3	3	3	3	1	1	1	1	3	3	1	1	3	3	3	3	3	3	3	3
11059	2	163	50	18	1	1	3	2	1	1	6	1	1	1	1	1	1	1	1	1	1	3	3	3	1	3	3	3	3	1	2	2	1	2	3	2	1	2	2	3	3	2	2	3	3	3	2	2	3
9846	2	170	75	18	1	0	2	2	3	1	5	1	2	2	2	1	1	1	1	1	1	2	2	2	2	2	2	2	2	2	2	2	2	2	2	2	2	2	2	1	1	2	2	2	1	2	1	2	1
9441	1	186	70	18	0	0	2	2	3	1	5	3	3	3	2	2	1	1	3	1	3	3	3	3	2	3	3	2	3	1	3	3	3	1	2	3	1	3	3	2	2	2	1	3	3	3	3	3	2
7087	1	183	59	18	0	0	3	3	2	1	4	4	2	3	2	3	1	1	1	1	3	1	3	3	3	2	3	2	3	1	3	3	2	1	3	3	1	3	2	2	2	2	2	2	2	2	2	2	2
8988	1	181	65	18	0	0	3	2	1	2	5	2	4	1	2	1	1	1	1	1	2	1	3	3	3	2	1	3	3	3	3	3	3	1	1	2	1	3	1	1	2	3	2	2	3	2	3	3	2
7102	2	163	54	18	0	1	2	2	2	1	6	2	1	2	2	2	2	2	1	1	3	2	2	3	2	2	2	2	2	2	2	2	3	2	1	2	1	3	2	2	2	2	2	2	2	2	2	2	1
8416	2	160	54	18	0	0	2	2	2	1	6	3	1	3	2	1	2	1	1	1	2	2	3	3	2	1	3	3	1	2	3	3	2	3	2	2	1	3	2	3	2	3	1	2	3	3	3	3	3
8203	2	167.3	47	18	0	0	2	1	2	3	5	4	2	4	2	3	4	3	3	3	3	2	3	3	1	2	3	3	3	2	3	3	2	2	2	2	2	3	1	2	2	2	2	2	2	2	2	2	3
8208	1	182	106	18	0	1	2	2	2	2	5	3	1	1	1	2	1	1	1	1	1	3	3	3	1	3	3	3	3	2	3	3	3	2	2	3	2	3	3	3	2	2	2	2	3	3	3	3	2
8545	2	162	50	18	0	1	2	2	2	2	5	4	5	5	3	5	5	5	5	1	5	1	3	3	2	1	1	2	1	2	2	2	3	2	1	2	1	2	2	2	2	2	2	2	2	2	2	2	1
9706	2	155	66	18	0	0	2	2	2	2	5	3	2	2	3	2	2	2	2	1	5	2	2	2	2	2	3	2	3	2	3	2	3	2	2	2	1	3	2	2	2	3	2	2	2	3	3	3	2
9234	1	181	101	18	1	0	6	1	3	1	1	5	5	5	1	1	1	1	1	1	1	2	2	2	2	2	2	2	2	2	2	2	2	2	2	2	2	2	2	2	2	2	2	2	2	2	2	2	2
8482	1	185	95	18	0	1	4	1	2	1	4	1	1	5	3	1	1	1	1	1	1	3	3	3	3	3	3	3	3	3	3	3	3	3	3	3	1	3	1	2	3	3	3	2	3	1	3	3	3
9383	1	180	83	18	0	1	4	1	2	1	4	2	2	1	2	1	1	1	1	1	1	1	3	3	3	3	3	3	3	2	2	2	2	2	2	2	2	2	2	2	2	2	2	2	2	2	2	2	2
8367	2	162	62	18	0	1	4	1	2	1	4	2	2	3	3	1	1	1	1	1	3	2	2	2	1	1	3	2	1	2	1	2	3	3	1	3	1	3	2	1	2	3	1	1	2	2	2	3	1
9985	2	168	55	18	0	0	4	1	2	1	4	2	3	2	2	1	1	1	1	1	1	2	2	2	2	2	2	2	2	2	2	2	2	2	2	2	2	2	2	2	2	2	2	2	2	2	2	2	2
5673	1	180	60	18	1	1	3	1	4	1	3	2	1	1	2	1	1	1	1	1	1	1	1	1	3	1	1	1	1	3	1	1	3	1	1	1	1	3	1	1	1	1	1	1	1	1	1	1	1
6953	2	167	90	18	1	0	4	1	1	1	5	2	2	1	2	1	1	1	1	1	1	2	2	2	2	2	2	2	2	2	2	2	2	2	2	2	2	2	2	2	2	2	2	2	2	2	2	2	2
6979	1	182	100	18	0	1	3	1	3	1	4	4	4	3	3	3	3	2	2	1	3	2	2	2	2	2	2	2	2	2	2	2	2	2	2	2	2	2	2	2	2	2	2	2	2	2	2	2	2
6969	2	165	60	18	1	1	3	1	3	1	4	2	4	4	2	1	2	2	2	1	1	3	3	3	1	3	3	3	3	1	3	2	2	3	2	2	3	2	3	3	3	3	1	2	2	3	2	2	3
11208	2	163	56	18	1	1	3	1	3	1	4	2	2	1	2	1	2	3	1	1	3	2	2	2	3	1	2	1	2	2	2	2	2	1	1	1	1	3	2	1	2	2	1	1	2	2	2	2	1
8905	2	165	53	18	0	1	3	1	3	1	4	2	1	3	2	3	3	3	3	3	3	2	2	2	2	2	2	2	2	2	2	2	2	2	2	2	2	2	2	2	2	2	2	2	2	2	2	2	2
7839	2	153	45	18	0	1	3	1	3	1	4	3	3	3	3	1	2	1	1	1	5	2	2	2	2	1	2	2	2	2	2	2	2	2	2	2	2	3	2	2	2	2	2	2	2	2	1	2	1
7414	2	162	80	18	0	0	3	1	3	1	4	3	2	3	2	1	1	1	1	1	3	2	2	2	2	1	1	2	3	2	2	1	2	2	1	2	1	2	2	3	2	2	2	1	2	3	2	2	1
8333	2	172	56	18	0	0	3	1	3	1	4	3	2	3	2	1	1	1	1	1	2	3	3	3	2	1	3	2	2	2	2	2	2	2	2	2	1	2	2	1	2	3	1	2	2	3	2	2	2
9826	2	160	56	18	0	0	3	1	3	1	4	2	3	2	2	3	1	1	3	1	1	2	2	2	2	2	2	2	2	2	2	2	3	2	2	2	1	2	2	2	2	2	2	2	2	2	2	2	2
9068	2	161	48	18	0	0	3	1	3	1	4	3	2	3	2	2	2	2	3	1	4	3	3	3	2	3	3	3	3	3	3	3	2	2	3	3	2	1	3	3	1	3	2	3	3	3	3	3	3
7431	1	176	100	18	0	1	3	1	2	1	5	5	5	2	3	2	2	5	2	1	2	2	2	2	2	2	2	2	2	2	2	2	3	1	1	3	1	2	2	2	2	2	1	1	3	3	3	3	3
9793	2	165	54	18	0	1	3	1	2	1	5	2	2	2	2	1	1	1	1	1	3	2	2	2	2	3	2	2	2	2	2	2	2	2	1	2	1	2	2	2	2	2	2	2	2	2	2	2	2
9828	2	168	51	18	1	1	3	1	2	1	5	4	2	4	2	2	1	1	1	1	4	3	3	2	2	2	3	2	3	2	3	2	3	2	1	3	1	2	2	1	1	2	1	2	2	2	1	2	1
7017	2	167	112	18	0	0	3	1	2	1	5	2	1	3	2	1	1	1	1	1	2	3	3	3	1	3	3	3	3	1	3	3	2	2	2	2	2	2	2	2	2	2	2	2	2	2	2	2	2
10055	1	174	67	18	0	0	3	1	2	1	5	4	3	3	3	4	2	4	2	1	5	2	2	2	2	2	2	2	2	2	2	2	2	2	2	2	2	2	2	2	2	2	2	2	2	2	2	2	2
10312	1	165	60	18	0	0	3	1	2	1	5	4	4	3	2	1	1	1	1	1	2	2	2	2	1	1	2	2	2	2	2	2	3	1	2	2	1	3	2	2	2	3	2	2	2	3	3	3	3
10283	2	165	59.5	18	0	0	3	1	2	1	5	5	1	2	2	1	1	1	1	1	5	2	3	2	2	2	2	2	2	2	3	2	3	2	3	2	1	3	2	2	3	3	2	2	2	2	2	2	2
7232	2	168	55	18	0	0	3	1	2	1	5	2	2	1	2	1	1	1	1	1	2	1	2	3	2	1	3	2	2	3	2	3	3	2	3	3	1	3	2	1	3	2	1	3	3	3	3	3	3
8951	2	160	50	18	0	1	3	1	3	2	3	3	4	2	2	2	5	3	3	1	4	2	2	3	2	1	3	2	2	2	2	3	2	2	3	1	1	3	2	2	2	2	2	2	2	2	2	2	2
9572	1	186	115	18	0	1	2	1	3	1	5	2	1	1	2	1	1	1	1	1	1	2	2	2	3	2	2	2	2	2	2	2	3	2	2	2	1	2	2	1	2	2	2	2	2	2	2	2	2
7581	2	162	62	18	0	0	2	1	3	1	5	4	2	4	3	5	1	3	1	1	2	2	3	3	3	3	3	3	3	2	3	3	3	1	3	2	1	3	2	1	2	3	2	3	3	3	3	3	2
7961	1	175	56	18	0	0	3	2	2	1	4	4	3	1	3	1	1	1	3	1	1	1	1	1	3	2	2	2	2	2	2	2	1	3	2	2	3	2	2	3	2	2	3	2	3	2	2	3	2
10507	2	150	50	18	0	0	2	1	2	1	6	3	2	3	2	2	2	4	2	1	3	1	2	1	2	1	1	2	2	3	2	2	3	1	1	2	1	3	1	2	2	3	1	1	1	2	2	2	1
8576	2	165	45	18	0	0	2	1	2	1	6	3	3	3	2	1	3	2	2	1	3	2	2	2	2	1	3	2	2	2	2	2	3	2	1	3	1	2	2	2	3	3	1	2	3	2	2	2	1
7549	2	175	55	18	0	1	3	2	1	1	5	2	2	3	2	1	1	1	4	1	1	2	2	2	2	1	2	2	2	2	2	2	3	2	1	2	1	2	2	1	2	2	1	2	2	3	2	3	2
10323	1	170	63	18	0	0	3	2	1	1	5	2	2	1	2	1	1	1	1	1	1	3	3	3	3	3	3	3	3	3	3	3	3	3	2	1	1	3	2	2	3	2	3	3	3	2	3	3	1
9936	2	168	105	18	0	0	3	2	2	2	3	2	4	2	2	2	1	1	1	1	1	1	3	3	2	3	2	3	3	2	3	3	2	2	2	1	1	2	3	1	2	2	1	3	3	3	3	3	3
7469	2	180	50	18	0	0	2	2	3	1	4	4	1	2	3	2	2	5	5	1	2	3	3	3	1	3	3	3	3	3	3	3	2	3	3	3	2	3	3	2	3	2	2	3	3	3	3	3	3
8789	2	157	45	18	0	0	2	1	2	2	5	3	2	2	2	2	1	1	1	1	3	2	2	2	3	2	2	3	3	3	2	2	3	2	1	2	1	2	2	2	2	3	1	2	2	2	2	2	1
7623	2	162	64	18	0	0	2	2	3	2	3	2	1	1	2	3	3	3	3	3	3	2	2	2	2	2	2	2	2	2	2	2	2	2	2	2	2	2	2	2	2	2	2	2	2	2	2	2	2
10281	1	170	50	18	0	1	2	2	2	2	4	1	1	1	2	1	1	1	1	1	1	2	2	2	2	2	1	2	2	2	2	2	3	2	2	1	2	2	2	2	2	2	2	2	2	2	2	3	2
10277	1	170	70	18	1	0	2	3	2	1	4	2	2	2	2	3	3	3	3	3	2	2	2	2	2	2	2	2	2	2	2	2	2	2	2	2	2	2	2	2	2	2	2	2	2	2	2	2	2
8406	2	158	100	18	0	0	4	1	3	1	2	3	1	2	2	1	1	4	1	1	5	3	3	3	1	3	3	3	3	3	3	3	2	1	3	3	1	1	3	3	3	1	2	3	3	1	3	3	3
9571	2	158	70	18	0	1	4	1	1	1	4	2	1	2	2	1	1	1	3	1	3	1	2	2	2	2	2	2	2	2	2	2	2	2	2	2	2	3	2	2	2	2	2	2	2	2	2	2	2
7275	1	182	86	18	0	0	3	1	3	1	3	4	2	4	2	3	2	2	2	1	2	2	2	2	2	2	2	2	2	2	2	2	2	2	2	2	2	2	2	2	2	2	2	2	2	2	2	2	2
9740	2	156	65	18	1	0	3	1	3	1	3	3	3	3	3	4	3	3	4	1	5	2	2	2	2	2	2	2	2	2	2	2	2	2	2	2	2	2	2	2	2	2	2	2	2	2	2	2	2
9181	2	165	60	18	0	0	3	1	2	1	4	5	2	5	3	3	1	4	3	1	1	2	2	2	2	2	2	2	2	2	2	2	2	2	2	2	2	2	2	2	2	2	2	2	2	2	2	2	2
7039	2	160	55	18	0	0	3	1	2	1	4	2	1	1	2	1	1	1	1	1	3	2	2	2	2	2	2	2	2	2	2	2	2	2	2	2	2	2	2	2	2	2	2	2	2	2	2	2	2
8093	2	168	51	18	0	0	3	1	2	1	4	4	4	4	3	2	2	2	2	1	3	2	3	3	1	3	3	3	3	2	3	3	1	2	2	2	2	2	2	2	2	2	2	2	2	3	3	3	3
8759	2	170	60	18	0	1	2	1	4	1	3	2	1	3	2	1	1	1	1	1	5	2	3	3	3	1	1	2	3	3	2	3	3	2	2	2	1	3	2	2	3	3	2	3	3	2	3	3	3
8302	1	176	69	18	1	1	3	2	3	1	2	3	3	4	2	1	1	4	1	1	5	2	2	2	1	2	3	3	3	2	3	3	1	3	3	3	1	2	3	2	3	2	1	3	3	3	3	3	3
7213	2	172	62	18	0	1	3	1	1	1	5	3	2	1	3	1	1	1	1	1	1	2	3	2	2	3	3	2	2	2	2	2	3	1	2	2	1	3	2	2	2	3	1	1	2	2	2	2	2
7090	1	173	60	18	0	1	3	1	1	1	5	4	3	3	3	2	3	2	2	1	5	1	1	1	3	1	1	1	1	3	2	2	3	2	1	1	1	3	2	2	2	2	2	2	2	2	2	2	2
7761	2	160	57	18	0	0	3	1	1	1	5	2	2	2	2	2	1	1	1	1	1	2	2	2	2	1	2	2	2	2	2	2	3	2	2	1	1	2	2	2	2	2	2	2	2	2	2	2	2
9180	2	166	60	18	0	1	2	1	3	1	4	2	2	2	2	3	3	3	2	3	3	2	2	2	2	2	2	2	2	2	2	2	3	2	2	2	2	2	2	2	2	2	2	2	2	2	2	2	2
7792	2	165	49	18	0	1	2	1	3	1	4	1	1	1	1	1	1	1	1	1	1	2	2	2	3	1	2	2	2	2	2	2	2	2	2	2	2	2	2	2	2	2	2	2	2	2	2	2	2
9617	2	162	160	18	1	0	2	1	3	1	4	2	1	1	2	1	1	1	1	1	5	3	3	3	2	2	3	3	3	2	3	3	3	2	2	1	1	2	2	1	2	3	1	2	3	2	3	3	2
8760	1	175	65	18	0	0	2	1	3	1	4	2	1	3	3	3	1	1	1	1	2	3	2	2	2	1	2	2	2	1	2	2	3	2	1	3	1	2	2	2	2	3	2	1	2	2	1	1	2
9973	2	160	65	18	0	0	2	1	3	1	4	3	4	5	2	3	1	5	1	1	5	1	1	1	3	1	1	1	1	1	1	1	2	2	1	1	1	3	1	1	1	1	1	1	1	3	1	1	1
9626	2	160	60	18	0	0	3	2	2	1	3	1	3	1	2	3	3	3	3	3	2	2	2	2	2	2	2	2	2	2	2	2	2	2	2	2	2	2	2	2	2	2	2	2	2	2	2	2	2
7106	1	182	55	18	1	0	3	2	2	1	3	2	3	1	2	1	1	1	1	1	3	2	2	2	2	2	2	2	2	2	2	2	2	2	2	2	2	2	2	2	2	2	2	2	2	2	2	2	2
9422	1	170	55	18	0	0	3	2	2	1	3	2	2	2	2	1	1	1	1	1	3	2	2	2	2	2	2	2	2	2	2	2	3	2	2	2	1	3	3	2	3	3	3	3	3	3	2	3	2
7000	1	177	67	18	0	1	3	3	3	1	1	2	2	2	2	1	1	1	1	1	2	3	3	3	1	3	3	3	3	1	3	3	3	1	1	1	1	3	2	2	2	3	1	2	3	3	3	3	2
9494	1	176	61	18	0	1	2	1	2	1	5	2	1	1	2	1	1	1	2	1	3	1	3	3	3	1	3	3	2	2	3	3	3	2	3	2	1	3	2	2	3	3	1	2	3	2	2	3	2
8969	2	172	60	18	0	0	2	1	2	1	5	2	2	3	2	2	2	2	2	2	3	3	3	3	1	3	3	3	3	1	3	3	1	3	3	3	3	1	3	3	3	3	3	3	3	3	3	3	3
8505	1	168	52	18	0	0	2	1	3	2	3	2	3	3	2	1	1	1	1	1	1	2	2	2	2	2	2	2	2	2	2	2	3	2	2	2	1	3	2	2	2	2	2	2	2	2	2	2	2
8268	2	155	53	18	0	0	2	1	1	1	6	3	2	3	3	3	1	1	1	1	3	1	3	3	1	1	2	2	2	2	3	3	2	1	1	1	1	3	1	2	2	2	1	1	1	2	2	2	2
10385	2	163	60	18	0	1	3	1	2	1	3	2	1	2	2	1	1	1	1	1	1	3	3	3	1	3	3	3	3	1	3	3	3	2	3	1	1	3	2	1	2	3	1	2	3	2	2	2	2
7624	1	173	75	18	0	0	3	1	2	1	3	3	1	4	2	1	1	1	1	1	4	1	1	1	1	1	2	2	3	3	1	3	3	1	1	1	1	3	1	1	1	1	1	1	1	1	2	2	2
8175	2	153	40	18	0	0	3	1	2	1	3	2	1	2	2	1	1	1	1	1	1	2	2	2	1	2	3	2	2	3	2	2	3	2	1	2	1	3	2	2	2	2	2	1	2	2	2	1	1
10172	2	180	50	18	1	1	3	2	3	1	1	1	1	1	1	1	1	1	1	1	1	3	3	3	1	3	3	3	3	1	3	3	3	1	3	3	3	3	3	1	3	1	3	1	3	1	3	1	3
10273	1	176	64	18	0	0	2	1	3	1	3	3	2	2	1	2	2	2	2	1	1	2	2	2	2	2	2	2	2	2	2	2	2	2	2	2	2	2	2	2	2	2	2	2	2	2	2	2	2
7207	2	165	58	18	0	1	2	1	2	1	4	3	4	1	2	3	3	3	3	3	1	3	3	3	2	2	3	3	3	2	3	3	3	1	1	3	3	3	3	3	2	2	3	3	3	3	3	3	3
5949	1	173	88	18	0	0	2	1	2	1	4	2	1	2	2	1	1	1	1	1	1	1	3	3	1	3	3	3	3	1	3	3	1	3	3	3	3	1	3	3	3	3	3	3	3	3	3	3	3
7912	2	172	52	18	0	0	2	1	2	1	4	3	1	4	2	2	1	3	5	1	4	2	2	2	2	1	2	2	2	2	2	2	3	2	2	2	1	2	1	2	2	2	1	2	2	2	2	1	1
8799	2	160	50	18	0	0	1	1	1	1	6	3	3	2	2	2	2	2	2	1	3	1	1	2	2	2	2	2	2	2	2	2	2	2	1	2	2	2	2	2	2	3	1	2	2	2	2	2	2
10032	1	172	87.6	18	0	0	1	2	2	2	3	1	1	1	2	1	1	1	1	1	1	1	2	2	2	1	2	2	2	2	2	2	3	1	1	1	1	3	1	2	1	2	1	2	2	3	2	2	1
8489	1	180	63	18	0	0	2	1	2	1	3	2	2	1	2	2	3	3	1	1	2	3	3	3	1	3	3	3	3	1	3	3	1	3	2	1	1	3	3	2	3	3	1	3	3	3	3	3	2
7858	2	153	43	18	0	0	2	1	2	1	3	2	1	1	2	1	1	1	1	1	5	2	2	2	2	2	2	2	2	2	2	2	3	2	2	2	1	3	2	2	2	2	2	2	2	2	2	2	1
9878	1	172	70	18	1	1	2	1	1	1	4	4	2	1	3	1	1	1	1	1	3	3	3	3	3	3	3	3	2	1	2	3	3	2	2	2	1	1	3	3	2	3	3	3	3	3	3	3	3
7740	2	163	48	18	0	0	3	1	2	1	1	2	2	3	2	3	2	2	4	1	3	2	2	3	2	2	2	3	2	2	2	3	3	2	3	3	2	2	3	2	2	3	1	2	3	3	2	3	2
3660	2	163	51	18	0	1	2	1	2	1	2	2	1	5	2	3	1	1	1	1	1	2	2	2	2	2	2	1	2	2	2	2	3	1	2	2	1	3	2	2	2	2	1	1	2	2	1	2	1
7212	1	175	53	18	0	0	3	1	1	1	1	2	1	1	2	1	4	1	1	1	3	1	3	3	1	3	3	3	3	3	3	3	2	3	3	3	1	3	3	3	3	2	3	3	3	3	3	3	3
7759	1	183	72	18	1	1	1	1	1	1	3	3	3	3	3	4	4	3	3	3	3	2	2	3	2	2	2	2	2	2	2	1	2	2	2	2	2	2	2	2	2	2	2	2	2	2	2	1	2
9431	1	182	75	18	1	1	1	1	1	1	1	3	3	3	3	3	3	3	3	3	3	2	2	2	2	2	2	2	2	2	2	2	2	2	2	2	2	2	2	2	2	2	2	2	2	2	2	2	2
11239	1	177	67	18	1	1	1	1	1	1	1	3	3	3	3	3	3	3	3	3	1	2	2	2	2	2	2	2	2	2	2	2	2	2	2	2	2	2	2	2	2	2	2	2	2	2	2	2	2
8352	2	195	120	19	1	1	6	5	6	5	10	3	4	2	2	1	1	1	1	1	1	1	2	3	3	2	3	3	3	1	3	3	3	1	1	2	1	2	2	2	2	2	1	2	3	2	3	3	2
6835	1	173	80	19	1	1	6	5	6	5	10	1	1	1	4	3	3	3	3	3	1	2	2	2	2	2	2	2	2	2	2	2	2	2	2	2	2	2	2	2	2	2	2	2	2	2	2	2	2
7542	1	171	70	19	1	1	6	5	6	5	10	5	1	5	2	1	1	1	5	1	3	2	3	3	1	1	3	2	2	3	3	3	3	3	3	1	1	3	3	1	3	1	1	3	3	3	3	3	3
6972	1	182	96	19	1	1	6	4	6	5	10	3	4	1	2	1	1	1	1	1	1	3	3	3	1	3	3	3	3	1	3	3	1	3	3	3	3	1	3	3	3	3	3	3	3	3	3	3	3
8496	1	175	75	19	1	1	6	4	6	5	10	3	1	1	2	1	1	1	1	1	1	1	1	2	3	1	1	1	1	2	2	2	2	1	3	1	1	2	2	2	3	3	1	2	2	3	2	3	1
7603	1	178	73	19	1	1	6	5	6	5	9	2	2	2	3	1	1	1	1	1	1	2	2	2	2	2	2	2	2	2	2	2	2	2	2	2	2	2	2	2	2	2	2	2	2	2	2	2	2
7583	2	164	50.7	19	1	1	6	5	5	5	10	2	1	1	3	1	1	1	1	1	4	3	3	3	1	3	3	3	3	1	3	3	3	3	3	3	3	1	3	3	3	3	3	3	3	3	3	3	3
8928	2	165	51	19	1	1	5	5	6	5	10	2	2	3	2	1	1	1	1	1	2	3	3	3	3	3	3	3	3	3	3	3	3	3	3	3	1	3	3	1	3	3	2	3	3	3	3	3	3
8937	2	162	57	19	1	0	5	5	6	5	10	2	2	1	2	1	1	1	1	1	1	2	2	2	2	2	3	2	2	2	2	2	3	1	1	1	1	3	2	2	2	3	1	2	2	2	2	2	2
7374	2	169	80	19	1	1	6	4	6	4	10	2	2	1	1	1	1	1	1	1	1	3	3	3	1	3	3	3	3	1	3	3	1	3	3	3	3	1	3	3	3	3	3	3	3	3	3	3	3
8563	1	182	70	19	1	1	6	4	6	4	10	3	2	3	2	2	2	2	1	1	2	2	3	3	2	2	3	3	2	3	3	3	2	2	2	2	1	2	2	2	2	3	2	3	3	2	3	3	2
7159	1	180	70	19	1	1	6	4	6	4	10	3	4	1	3	1	1	1	1	1	2	3	3	3	2	3	3	3	3	3	3	3	3	2	3	1	1	3	3	3	3	3	3	3	3	3	3	3	3
8849	1	183	75	19	1	1	6	4	5	5	10	2	2	1	2	3	2	2	2	1	4	2	2	2	2	2	2	2	2	2	2	2	2	2	2	2	2	2	2	2	2	2	2	2	2	2	2	2	2
6884	1	175	65	19	1	1	6	5	5	4	10	2	4	1	2	1	1	1	1	1	5	2	3	3	3	1	3	3	3	3	3	3	3	2	3	2	1	2	3	3	3	3	1	2	3	2	3	3	3
8466	1	180	120	19	1	1	5	5	6	4	10	2	1	1	3	1	1	5	1	1	1	3	3	3	1	1	3	3	3	1	3	3	3	3	3	3	1	3	3	3	1	3	1	3	3	3	3	3	3
10860	2	170	108	19	1	1	5	5	5	5	10	5	5	3	3	3	3	3	3	1	3	2	2	2	2	2	2	2	2	2	2	2	2	2	2	2	2	2	2	2	2	2	2	2	2	2	2	2	2
8361	1	170	80	19	1	1	5	5	5	5	10	3	2	1	2	1	1	1	1	1	1	2	2	3	2	2	2	3	2	2	2	2	2	2	2	2	1	3	2	2	2	2	1	2	2	2	2	2	1
9255	2	180	75	19	1	1	5	5	5	5	10	3	3	3	2	3	3	3	3	3	3	2	2	2	2	2	2	2	2	2	2	2	2	2	2	2	2	2	2	2	2	2	2	2	2	2	2	2	2
9210	1	173	67	19	1	1	5	5	5	5	10	4	2	3	3	4	5	4	1	1	5	3	3	2	1	3	3	2	2	2	2	3	3	3	3	2	1	3	3	2	2	3	1	3	3	3	3	3	3
7724	2	166	65	19	1	1	5	5	5	5	10	3	3	3	3	3	2	4	1	1	5	2	3	2	2	1	3	3	2	2	2	2	3	2	3	2	1	2	2	2	2	2	2	2	2	2	2	2	2
7867	1	175	60	19	1	1	5	5	5	5	10	3	2	3	3	2	3	2	2	1	5	2	2	3	1	1	3	2	3	2	3	3	3	2	3	3	1	3	2	2	2	3	3	3	3	2	2	3	2
7069	2	174	57	19	1	1	5	5	5	5	10	2	2	1	2	1	1	1	1	1	5	3	3	3	2	1	2	3	3	2	3	3	3	2	3	3	1	2	1	3	2	3	1	2	3	2	3	3	1
8599	1	170	48	19	1	1	5	5	5	5	10	4	2	5	2	1	1	3	2	1	3	1	3	3	1	2	3	1	3	1	3	3	3	3	3	3	1	3	3	3	3	3	1	3	3	3	2	3	3
10060	1	183	79	19	1	1	6	4	6	4	9	3	3	5	3	3	5	5	5	1	5	3	2	2	2	2	3	2	2	2	2	2	2	3	3	3	2	1	3	3	2	2	2	3	3	3	3	2	1
10260	2	166	48	19	1	1	6	4	6	4	9	5	5	4	4	1	1	1	1	1	5	2	2	2	2	2	2	2	2	2	2	2	2	2	2	2	2	2	2	2	2	2	2	2	2	2	2	2	2
9886	1	181	87	19	1	0	6	4	5	4	10	3	2	2	3	1	1	1	1	1	1	3	3	3	2	1	3	3	3	1	3	3	3	3	1	1	1	3	2	2	2	3	1	2	3	3	3	3	2
8973	1	188	90	19	1	1	5	4	6	4	10	3	1	1	2	2	1	1	1	1	1	3	3	3	1	3	3	2	2	3	3	3	1	3	1	3	3	3	3	2	3	2	1	3	3	3	3	3	1
11111	1	178	74	19	1	1	6	5	5	4	9	3	3	2	4	1	1	1	1	1	1	3	3	3	1	3	3	3	3	3	3	3	3	1	1	1	1	3	3	1	3	3	3	3	3	3	3	3	3
10482	2	173	110	19	1	0	6	5	5	4	9	4	2	2	2	2	2	2	3	2	5	3	3	3	3	1	3	3	3	3	3	3	3	3	3	3	1	1	3	3	1	3	1	2	1	3	1	1	3
8601	2	165	60	19	1	1	5	4	6	5	9	3	2	2	2	1	1	1	1	1	3	3	3	3	1	3	3	3	3	2	3	3	3	2	2	2	1	2	3	3	3	3	2	2	3	2	2	3	2
7837	1	177	65	19	1	1	5	5	6	4	9	2	2	2	2	2	2	2	2	2	1	2	2	2	2	1	1	1	1	2	2	2	3	1	1	1	1	2	2	2	2	2	2	2	2	2	2	2	2
9896	2	162	60	19	1	0	5	4	5	5	10	2	3	3	3	2	3	2	3	1	2	2	2	2	2	2	2	2	2	2	2	2	2	2	2	2	2	2	2	2	2	2	2	2	2	2	2	2	2
10159	1	180	78	19	1	1	5	5	5	4	10	2	1	1	2	1	1	1	1	1	1	3	3	3	1	3	3	3	3	1	3	3	1	1	1	1	1	3	1	1	1	3	3	3	3	3	3	3	3
8678	1	170	72	19	1	1	5	5	5	4	10	3	3	3	3	3	3	3	3	3	3	2	2	2	2	2	2	2	2	2	2	2	2	2	2	2	2	2	2	2	2	2	2	2	2	2	2	2	2
10550	2	175	70	19	1	1	5	5	5	4	10	1	1	3	2	2	2	3	2	1	2	2	3	3	3	2	2	2	2	3	2	2	3	2	2	2	1	3	2	2	2	2	2	2	2	2	2	2	2
10409	1	177	56	19	1	1	5	5	5	4	10	2	1	1	3	2	2	1	2	1	3	2	2	3	2	3	3	3	3	1	3	3	3	3	3	3	2	3	2	2	2	3	2	2	3	3	2	3	2
10335	1	170	65	19	1	1	5	5	5	5	9	2	1	1	2	1	2	1	1	1	3	3	3	3	2	1	3	3	2	2	3	3	2	3	1	2	2	2	2	2	2	3	1	3	3	2	2	2	1
9065	2	155	58	19	1	1	5	5	5	5	9	3	2	2	2	1	1	1	1	1	3	2	3	3	3	2	2	3	3	2	3	3	3	2	1	2	1	2	3	1	2	2	2	3	3	2	1	3	2
7031	2	168	55	19	1	1	5	5	5	5	9	2	2	1	2	1	1	1	1	1	1	2	3	3	1	2	3	2	2	3	3	3	3	2	2	2	1	2	2	2	2	3	1	2	2	2	2	2	3
10387	1	170	80	19	1	0	4	5	5	5	10	1	1	3	1	1	1	1	1	1	1	3	3	3	1	1	3	3	3	1	3	3	1	3	3	3	3	1	3	3	3	3	3	3	3	3	3	3	3
7580	1	180	85	19	1	1	6	4	5	3	10	2	4	1	2	1	1	1	1	1	1	2	3	3	2	3	3	3	3	2	3	3	3	2	2	2	1	3	2	2	2	3	2	3	3	3	3	3	2
9808	1	178.5	74	19	1	1	6	4	6	4	8	2	2	2	2	1	1	1	1	1	1	2	2	2	2	2	2	2	2	2	3	2	3	2	1	2	1	3	2	2	2	2	2	2	2	3	3	3	2
10703	2	173	62	19	1	1	6	4	6	4	8	5	2	4	3	3	3	3	3	1	3	2	2	2	2	2	2	2	2	2	2	2	2	2	2	2	2	2	2	2	2	2	2	2	2	2	2	2	2
9512	2	170	89	19	1	0	6	4	6	4	8	3	2	1	3	1	2	2	2	1	2	3	3	3	2	2	3	3	3	1	3	3	2	2	3	3	1	2	2	2	2	2	1	2	2	2	3	2	1
7471	1	176	80	19	1	1	6	4	5	4	9	2	3	2	2	2	2	2	1	1	2	3	3	3	2	3	3	2	2	1	3	3	2	3	1	3	1	3	2	2	3	3	2	3	3	3	3	3	2
8961	1	184	62	19	1	1	6	4	4	4	10	2	2	3	2	1	1	1	1	1	5	2	2	2	2	2	2	2	2	2	2	2	3	2	2	2	2	2	2	2	2	2	2	2	2	2	2	2	2
10469	1	179	75	19	1	1	5	4	6	4	9	3	3	3	2	1	1	1	1	1	5	3	3	3	1	3	3	3	3	1	3	3	1	3	3	3	3	3	3	3	3	3	3	3	3	3	3	3	3
10063	1	181	73	19	1	1	5	4	6	4	9	4	3	3	2	2	1	1	3	1	4	3	3	3	1	3	3	3	3	1	3	3	1	2	3	3	1	3	2	2	2	2	2	2	2	2	2	2	2
8089	2	175	80	19	1	1	5	4	5	4	10	4	2	2	3	3	1	1	1	1	2	2	1	1	2	3	1	2	1	1	2	3	2	2	3	3	1	2	3	3	2	3	2	3	3	3	2	3	3
10679	1	184	77	19	1	1	5	4	5	4	10	2	1	2	2	1	1	1	1	1	1	2	2	2	2	2	2	2	2	2	2	2	2	2	2	1	1	3	2	2	2	2	2	2	2	2	2	2	2
10057	1	185	76	19	1	1	5	4	5	4	10	2	2	1	3	1	1	1	1	1	1	3	3	3	3	1	3	3	3	1	3	3	2	2	2	2	2	3	3	3	3	3	3	3	3	3	3	3	3
9909	1	163	74	19	1	1	5	4	5	4	10	3	2	1	2	1	2	1	1	1	1	2	2	2	2	2	2	2	2	2	2	2	3	2	1	1	1	2	2	2	2	2	2	2	2	2	3	3	2
10626	1	178	72	19	1	1	5	4	5	4	10	5	5	5	1	3	3	3	3	3	1	2	2	2	2	2	2	2	2	2	2	2	2	2	2	2	2	2	2	2	2	2	2	2	2	2	2	2	2
7078	2	175	70	19	1	1	5	4	5	4	10	2	1	2	2	1	1	1	1	1	1	3	3	3	1	2	3	3	2	1	3	3	2	3	1	3	1	3	2	1	2	2	3	3	3	2	3	3	2
10349	2	164	66	19	1	1	5	4	5	4	10	2	1	1	4	3	3	3	3	3	2	2	2	2	2	2	2	2	2	2	2	2	2	2	2	2	2	2	2	2	2	2	2	2	2	2	2	2	2
9305	2	170	60	19	1	1	5	4	5	4	10	3	2	1	1	2	2	5	1	1	4	2	2	2	2	2	2	2	2	2	2	2	2	2	2	2	2	2	2	2	2	2	2	2	2	2	2	2	2
9658	1	177	77	19	1	0	5	4	5	4	10	3	2	3	2	2	1	3	1	1	5	2	2	2	2	2	2	2	2	2	2	2	2	2	2	2	1	3	1	2	2	2	2	2	2	2	2	2	2
7848	2	165	64	19	1	0	5	4	5	4	10	3	3	2	2	1	1	1	1	1	5	3	2	2	2	1	2	2	2	2	3	3	3	3	1	1	1	3	3	3	2	3	2	3	3	3	2	2	2
7596	1	172	55	19	1	0	5	4	5	4	10	5	5	5	4	1	1	1	1	1	2	3	3	3	1	3	3	3	3	1	3	3	3	2	3	3	1	2	3	3	3	3	2	3	3	3	3	3	2
9378	2	173	59	19	1	1	5	5	6	4	8	3	2	2	2	2	2	2	2	1	4	2	2	2	2	2	2	2	2	2	2	2	2	2	2	2	2	2	2	2	2	2	2	2	2	2	2	2	2
9427	1	187	93	19	1	1	5	5	5	4	9	2	2	3	3	2	1	4	2	1	5	3	3	3	1	1	3	3	3	3	3	3	3	3	3	3	1	3	3	2	3	3	3	3	3	3	3	3	1
7408	1	178	71	19	1	1	5	5	5	4	9	2	2	2	2	1	1	1	1	1	1	2	3	3	2	1	3	3	3	2	3	3	2	2	1	2	1	3	2	2	2	3	1	2	3	2	3	3	3
7559	2	160	53.8	19	1	1	5	5	5	4	9	2	2	2	2	1	1	1	1	1	3	2	2	2	2	2	2	2	2	2	2	2	2	2	2	2	2	2	2	2	2	2	2	2	2	2	2	2	2
6982	2	159	51	19	1	1	5	5	5	4	9	2	1	1	2	1	1	1	1	1	1	2	2	2	2	3	3	3	3	2	2	2	2	2	2	1	1	2	2	2	2	2	2	2	2	3	2	2	2
9580	2	170	50	19	1	1	5	5	5	4	9	4	3	5	3	4	5	2	5	1	5	2	2	2	2	1	3	2	2	2	2	2	1	3	3	3	1	2	2	2	2	2	1	2	1	2	2	2	1
10320	1	178	75	19	1	1	5	5	4	4	10	3	3	3	3	3	3	3	3	3	1	2	2	2	2	2	2	2	2	2	2	2	2	2	2	2	2	2	2	2	2	2	2	2	2	2	2	2	2
7550	2	162	55	19	1	1	5	5	5	5	8	2	1	1	2	1	1	1	1	1	1	3	3	3	1	3	3	3	3	2	3	3	1	3	3	2	1	3	2	3	3	3	3	2	3	3	3	2	3
11073	1	173	68	19	1	0	5	5	5	5	8	2	4	1	2	3	1	1	1	1	3	2	2	2	2	2	2	2	2	2	2	2	2	2	2	2	2	2	2	2	2	2	2	2	2	2	2	2	2
9241	2	155	50	19	1	0	4	5	5	4	10	5	3	1	3	1	1	1	1	1	5	3	3	3	1	3	3	3	3	1	3	3	1	3	3	3	3	3	1	1	2	3	1	3	2	2	2	3	1
10908	1	173	66	19	1	1	6	4	6	3	8	4	3	3	3	3	3	1	1	3	3	3	3	3	1	3	3	3	3	1	3	3	2	3	3	3	1	3	2	3	3	2	1	2	2	3	3	3	3
9983	1	181	78	19	1	1	6	4	5	4	8	3	2	2	2	3	1	1	1	1	1	3	3	2	2	1	3	3	3	1	3	3	3	3	3	3	1	3	3	3	1	3	3	3	3	3	3	3	3
10074	1	173	70	19	0	1	6	4	5	4	8	2	4	2	2	3	2	2	2	2	1	2	2	2	2	2	2	2	2	2	2	2	2	2	2	2	2	2	2	2	2	2	2	2	2	2	2	2	2
7916	1	183	90	19	1	1	5	4	5	3	10	4	2	5	3	2	1	1	1	1	3	2	3	3	2	1	3	3	3	2	2	3	3	1	3	2	1	2	3	1	1	3	1	3	3	3	3	3	3
7450	1	175	70	19	1	1	5	4	6	4	8	3	2	1	3	1	1	1	1	1	1	2	3	3	2	2	3	2	2	2	2	2	2	2	2	2	1	2	2	2	2	2	2	2	2	2	2	2	2
7820	2	159	55	19	1	0	6	5	6	5	5	3	2	2	2	1	2	1	2	1	3	3	3	2	2	1	3	2	2	1	3	2	2	2	3	3	1	2	3	3	3	3	2	2	2	3	1	2	3
6836	1	172	101	19	1	1	5	4	5	4	9	3	3	3	3	3	3	3	3	3	2	2	2	2	2	2	2	2	2	2	2	2	2	2	2	2	2	2	2	2	2	2	2	2	2	2	2	2	2
9538	1	177	90	19	1	1	5	4	5	4	9	4	3	4	3	2	2	2	2	1	5	2	2	2	2	2	2	2	2	2	2	2	2	2	2	2	2	2	2	2	2	2	2	2	2	2	2	2	2
8443	2	165	60	19	1	1	5	4	5	4	9	5	3	5	3	4	1	1	4	4	1	3	3	2	2	1	2	2	3	2	3	3	1	3	2	3	1	3	3	3	3	3	2	3	2	3	3	3	3
8733	2	163	58	19	1	1	5	4	5	4	9	3	1	4	3	1	4	1	1	1	1	3	3	3	2	1	3	3	3	1	3	3	3	3	3	3	1	3	2	2	2	3	3	2	3	2	3	3	3
7611	2	168	53	19	1	1	5	4	5	4	9	3	2	3	2	3	2	3	1	1	1	3	3	3	1	3	3	3	3	1	3	3	1	3	3	3	3	1	3	3	3	3	3	3	3	3	3	3	3
9178	2	157	47	19	1	1	5	4	5	4	9	3	5	4	2	5	1	1	1	1	2	3	3	3	1	3	3	3	3	2	3	1	3	1	1	1	3	3	2	3	1	3	1	3	2	3	3	3	1
10056	2	165	65	19	1	0	5	4	5	4	9	2	2	2	3	2	2	1	3	1	3	3	3	2	2	1	2	2	3	2	3	3	2	2	2	2	1	3	2	2	2	3	1	2	3	3	2	3	3
9347	2	165	58	19	1	0	5	4	5	4	9	1	1	2	2	2	2	2	1	1	5	3	3	3	2	1	3	3	3	2	2	2	1	2	3	1	1	3	2	2	2	3	2	2	3	2	1	2	3
9165	1	169	54	19	1	1	5	4	4	4	10	3	4	4	3	1	1	3	1	1	1	1	3	3	3	2	3	2	2	1	2	3	2	2	1	3	1	2	2	2	2	2	1	2	2	2	2	2	1
9382	2	161	44	19	1	0	5	4	4	4	10	2	1	1	2	1	1	1	1	1	1	2	2	3	2	2	2	3	3	2	2	2	3	2	1	1	1	3	2	1	2	3	2	2	3	2	3	3	1
8154	1	185	71	19	1	1	5	4	5	5	8	4	4	5	3	1	1	1	4	1	5	2	3	3	1	2	3	3	3	2	3	3	3	3	3	2	1	3	3	3	3	3	1	3	3	3	3	3	3
7245	2	174	61	19	1	1	5	4	5	5	8	2	2	1	3	1	1	1	1	1	1	1	3	3	1	1	1	3	2	2	2	2	3	1	1	1	1	3	1	1	2	3	1	1	3	1	3	3	3
10964	1	178	68	19	1	1	5	5	5	4	8	4	3	1	3	3	1	2	1	1	3	2	3	3	1	2	2	2	2	2	3	3	3	2	1	2	1	3	2	2	2	2	1	2	2	3	2	2	2
10816	2	165	50	19	1	1	5	5	5	4	8	3	2	3	2	3	2	2	2	1	5	3	2	2	2	1	3	2	2	1	2	2	2	2	3	3	1	2	2	3	3	2	2	2	3	3	2	2	2
9960	2	170	52	19	1	1	5	5	6	5	6	2	2	1	2	1	1	1	1	1	5	3	3	3	1	1	2	2	2	2	2	2	2	2	2	2	1	2	2	2	2	2	1	2	2	2	2	2	2
7877	2	167	70	19	1	1	4	3	5	5	10	2	2	2	2	1	1	1	1	1	1	2	2	2	2	2	2	2	2	2	2	2	2	2	1	2	2	2	2	2	2	2	2	2	2	2	2	2	2
10537	1	173	70	19	1	1	4	4	5	4	10	3	1	3	3	1	1	2	1	1	3	3	3	3	2	2	3	3	2	2	3	3	2	2	3	3	1	2	3	2	2	2	1	3	3	3	2	3	3
9473	2	170	50	19	0	1	4	4	5	4	10	5	5	5	3	1	1	2	2	1	4	3	3	3	2	3	3	3	3	1	3	3	1	1	1	2	3	3	2	2	1	2	1	3	3	3	3	3	2
10366	2	160	41	19	1	0	4	4	5	4	10	3	4	2	2	3	3	2	4	2	5	3	3	3	2	2	3	3	3	3	2	2	3	2	1	2	1	3	2	3	3	3	1	1	3	2	1	3	2
9145	2	160	55	19	1	1	5	5	4	4	9	2	3	1	2	1	1	1	1	1	2	3	3	3	3	1	3	3	3	1	3	3	1	3	3	3	1	3	3	3	3	3	3	3	3	3	3	3	1
11043	1	180	84	19	1	1	5	5	5	5	7	5	5	5	2	3	3	3	3	1	5	2	2	2	2	2	2	2	2	2	2	2	2	2	2	2	2	2	2	2	2	2	2	2	2	2	2	2	3
8692	1	180	60	19	1	1	5	5	5	5	7	3	2	1	3	1	1	1	1	1	2	1	1	1	3	1	1	1	1	3	1	1	3	1	1	1	1	3	1	1	1	1	1	1	1	1	1	1	1
7783	2	170	53	19	1	1	5	5	5	5	7	3	1	1	2	1	1	1	1	1	2	1	3	3	1	2	2	2	2	2	2	2	3	2	2	2	1	2	2	2	2	2	2	2	2	2	2	2	2
9132	2	160	48	19	1	0	5	5	5	5	7	3	2	3	3	2	3	3	3	3	3	2	2	2	2	2	2	2	2	2	2	2	2	2	2	2	2	2	2	2	2	2	2	2	2	2	2	2	2
8960	2	158	41	19	1	1	4	4	5	5	9	2	2	4	3	1	1	1	1	1	1	2	3	3	1	3	3	3	3	3	3	3	3	2	2	2	1	3	2	2	2	3	2	2	3	2	2	2	2
7348	2	168	67	19	1	1	5	5	4	5	8	2	1	2	2	1	1	1	1	1	1	1	3	3	3	1	3	3	3	1	3	3	3	1	3	3	1	3	3	3	3	3	1	1	3	3	3	3	3
8664	2	163	58	19	1	1	5	5	4	5	8	3	4	1	2	2	1	2	1	1	1	3	3	3	2	3	3	2	3	3	3	3	2	2	1	1	1	3	3	3	1	3	1	3	3	3	3	3	2
9949	1	187	80	19	1	1	4	5	5	4	9	3	3	3	3	1	1	1	1	1	1	3	2	2	2	2	3	2	2	2	3	3	3	2	2	2	1	3	1	2	3	2	2	1	2	3	2	2	1
10432	1	177	62	19	1	1	4	4	4	5	10	2	3	3	3	3	2	1	2	3	3	2	2	2	2	2	2	2	2	2	2	2	2	2	2	2	2	2	2	2	2	2	2	2	2	2	2	2	2
9698	1	175	70	19	0	1	4	5	5	5	8	5	5	2	3	1	5	2	2	1	3	3	3	3	1	3	3	3	3	3	3	3	3	3	3	2	1	2	2	2	2	2	2	2	2	2	2	2	2
10020	1	173	60	19	0	1	4	5	4	5	9	2	2	2	2	1	1	1	1	1	1	2	2	2	2	2	2	2	2	2	2	2	2	2	2	2	2	2	2	2	2	2	2	2	2	2	2	2	2
6983	1	180	76	19	1	0	6	2	5	4	9	2	2	1	2	1	2	3	1	1	1	1	2	2	2	1	2	3	3	2	3	3	3	2	1	2	1	3	2	2	1	3	2	2	3	3	3	3	2
8428	1	172	60	19	1	1	6	4	6	4	6	2	1	2	3	1	1	1	1	1	1	3	3	3	1	3	3	3	3	1	3	3	3	3	3	1	1	1	3	3	3	3	1	3	3	3	3	1	1
9177	1	172	75	19	1	1	6	4	5	4	7	3	2	2	3	1	3	3	1	1	4	2	2	2	2	2	3	2	3	1	3	3	3	2	2	3	2	2	2	2	2	3	1	2	3	3	3	3	1
10945	2	165	60	19	1	1	6	4	5	4	7	4	3	1	3	2	1	1	3	1	1	3	3	3	2	3	3	3	3	2	3	3	3	2	2	1	1	3	3	2	2	3	3	3	3	2	3	3	2
11114	1	177	79.9	19	1	1	6	5	6	4	5	4	4	3	2	3	1	2	3	1	3	1	1	1	3	1	1	1	1	3	1	1	1	3	1	1	1	2	1	3	3	3	1	1	1	2	1	1	1
9370	2	169	52	19	1	1	5	3	5	4	9	5	2	3	3	2	1	1	1	1	1	2	2	2	2	2	2	2	2	2	2	2	2	2	2	2	2	2	2	2	2	2	2	2	2	3	2	2	2
10449	2	160	46	19	1	0	5	3	5	4	9	2	1	1	2	3	3	2	1	1	1	1	3	2	1	1	3	2	3	1	3	3	3	2	1	3	1	3	3	1	1	3	1	2	2	3	3	3	2
7808	2	162	50	19	1	0	6	5	4	3	8	4	3	2	3	1	1	1	2	1	3	2	2	2	2	2	2	2	2	2	2	2	2	2	2	2	2	2	2	2	2	2	2	2	2	2	2	2	2
10061	2	172	74	19	1	0	5	5	5	2	9	2	2	3	3	3	3	4	5	1	2	3	3	3	3	2	3	2	2	3	3	3	3	3	3	3	1	3	3	3	3	1	3	3	3	3	3	3	3
10362	2	165	45	19	1	1	5	4	6	4	7	2	1	2	2	1	1	1	1	1	4	2	2	2	2	2	2	2	2	2	2	2	3	2	2	2	1	3	2	2	2	2	2	2	2	2	2	2	2
9487	1	168	51	19	1	0	5	3	4	4	10	3	3	3	2	1	1	1	1	1	3	1	1	1	3	2	2	2	2	2	2	2	2	2	2	2	2	2	2	2	2	2	2	2	2	2	2	2	2
10229	1	187	80	19	1	1	5	4	4	3	10	3	2	1	3	2	1	1	1	1	5	2	2	3	2	1	3	3	3	1	3	3	3	2	2	3	1	2	2	3	3	3	2	3	3	2	2	3	3
10331	1	170	115	19	1	1	5	3	5	5	8	3	3	5	2	3	2	3	2	1	5	1	1	1	1	1	2	2	1	1	1	1	1	3	1	2	2	2	1	3	3	2	1	1	1	2	1	1	1
7034	2	163	105	19	1	1	5	4	5	4	8	4	2	2	2	2	1	3	1	1	2	2	3	3	1	1	3	3	3	2	3	3	3	2	3	1	2	3	3	3	3	3	3	3	3	3	2	2	3
7256	1	184	83	19	1	1	5	4	5	4	8	4	3	5	2	2	1	1	1	1	3	2	2	3	3	1	3	2	1	2	3	3	3	2	1	2	1	2	2	2	2	2	1	2	2	3	3	3	1
9429	1	183	80	19	1	1	5	4	5	4	8	2	1	2	2	1	1	1	1	1	1	3	3	3	1	2	2	3	3	2	3	3	3	2	1	1	1	3	2	2	2	3	1	2	3	2	3	3	3
10317	1	180	75	19	1	1	5	4	5	4	8	2	1	1	2	1	1	1	1	1	1	3	3	3	2	3	3	3	3	2	3	3	3	3	3	1	1	3	3	2	3	3	1	3	3	2	3	3	3
11159	1	171	67	19	1	1	5	4	5	4	8	2	1	2	2	1	1	1	1	1	1	3	3	3	2	3	3	3	3	1	3	3	1	3	3	3	3	3	2	2	2	3	1	3	3	3	3	3	3
9258	1	177	65	19	1	1	5	4	5	4	8	3	3	2	3	2	1	1	1	1	3	2	2	3	3	1	2	3	3	2	2	3	2	2	2	2	2	2	3	3	2	3	1	3	3	3	3	3	1
10501	2	168	65	19	1	1	5	4	5	4	8	2	1	2	2	3	3	2	1	1	5	3	2	2	3	1	3	2	3	1	3	3	3	1	1	1	1	3	2	2	2	2	2	3	3	3	2	3	1
10726	1	160	62	19	1	1	5	4	5	4	8	3	1	3	3	1	1	1	1	1	2	2	2	2	2	2	2	2	2	2	2	2	2	2	2	2	2	2	2	2	2	2	2	2	2	2	2	2	2
7803	2	170	60	19	0	1	5	4	5	4	8	3	3	3	2	3	4	2	2	1	5	2	2	2	2	2	2	2	2	3	2	2	2	1	2	2	1	2	2	1	2	2	3	2	2	2	2	2	2
9309	2	163	59	19	1	1	5	4	5	4	8	3	1	1	2	1	1	2	1	1	1	3	3	3	2	3	3	3	3	2	3	3	2	2	2	3	1	3	2	2	3	3	3	2	3	3	3	3	2
8120	2	169	58	19	1	1	5	4	5	4	8	3	3	3	3	3	3	3	3	3	2	2	2	2	2	2	2	2	2	2	2	2	2	2	2	2	2	2	2	2	2	2	2	2	2	2	2	2	2
8324	2	165	55	19	1	1	5	4	5	4	8	3	2	2	3	1	1	1	1	1	2	2	3	2	1	2	3	2	3	2	3	3	3	2	3	1	1	2	3	3	2	3	1	2	2	2	2	3	2
10691	2	165	53	19	1	1	5	4	5	4	8	3	2	1	3	1	1	1	3	1	1	3	3	3	2	1	2	3	2	2	3	3	3	2	2	2	2	3	2	2	2	2	2	2	2	2	2	2	2
7976	2	164	50	19	1	1	5	4	5	4	8	3	2	3	3	2	2	2	2	1	5	2	2	2	2	2	2	2	2	2	2	2	2	2	1	1	1	3	2	2	2	2	1	2	2	2	2	2	2
9690	2	160	43.5	19	1	1	5	4	5	4	8	3	3	3	2	2	1	3	2	1	5	3	3	3	2	1	3	2	3	1	3	3	3	2	1	3	1	2	3	3	3	3	1	3	3	3	3	3	2
10596	1	175	70	19	1	0	5	4	5	4	8	2	2	3	2	3	4	1	1	3	5	2	2	2	2	2	2	2	2	2	2	2	3	2	2	2	1	2	2	2	2	3	1	3	3	3	3	3	3
8501	2	165	70	19	1	0	5	4	5	4	8	2	2	1	3	1	1	1	1	1	5	2	2	2	2	2	2	2	2	2	2	2	2	2	2	2	2	2	2	2	2	2	2	2	2	2	2	2	2
8174	2	158	53	19	1	0	5	4	5	4	8	3	1	3	2	3	2	1	1	1	5	3	2	3	2	2	2	3	3	3	2	3	3	1	3	3	2	3	3	2	2	3	3	3	3	2	2	3	2
6923	2	162	45	19	1	0	5	4	5	4	8	3	2	2	2	1	1	1	2	1	2	1	2	2	2	1	2	2	2	2	2	2	2	2	1	2	1	2	2	2	2	2	1	2	2	2	2	2	1
10723	1	175	55	19	1	1	5	5	5	3	8	5	5	5	1	4	3	2	1	1	2	2	2	2	2	2	2	2	2	2	2	2	2	2	2	2	2	2	2	2	2	2	1	2	2	3	1	2	2
9741	1	176	60	19	1	1	5	4	4	4	9	2	2	1	2	1	1	1	1	1	1	1	1	1	3	3	3	3	3	3	3	3	3	3	3	3	2	2	2	2	2	2	2	2	2	2	2	2	2
10225	2	158	60	19	1	1	5	4	4	4	9	2	1	1	2	1	1	1	1	1	4	3	3	3	2	3	3	3	3	3	3	3	3	3	3	3	1	3	1	3	3	3	1	2	3	1	3	3	3
8003	1	169	50	19	0	1	5	4	5	5	7	3	2	2	2	1	3	1	1	1	5	2	3	3	1	2	3	3	2	1	3	3	2	2	2	3	1	2	2	1	2	3	2	2	2	3	3	3	1
7793	1	179	75	19	1	1	5	5	5	4	7	4	3	2	3	2	1	1	1	1	3	2	2	2	2	2	2	2	2	2	2	2	3	2	2	2	2	2	2	2	2	2	2	2	2	2	2	2	2
9078	2	167	67	19	1	1	5	5	5	4	7	3	2	4	3	1	1	4	5	1	5	3	3	3	2	3	3	2	3	2	3	3	3	3	3	1	1	3	2	3	3	3	3	3	3	1	1	3	1
9124	2	166	60	19	1	1	5	5	5	4	7	4	2	4	3	1	1	1	1	1	5	3	3	3	2	2	3	2	2	3	3	3	3	3	1	3	1	3	2	3	3	3	1	2	2	3	3	2	1
7638	2	158	51	19	1	0	5	5	5	4	7	3	2	2	2	1	2	2	3	1	3	2	3	2	1	2	3	2	3	2	2	2	2	2	3	3	1	3	2	3	2	2	1	2	2	3	2	2	2
8401	2	155	38	19	1	0	5	5	5	4	7	3	2	3	2	1	1	1	1	1	5	3	3	2	2	3	3	3	3	3	3	3	3	2	1	1	1	2	3	3	3	3	2	2	3	2	3	3	3
9668	1	185	105	19	1	1	4	4	5	4	9	4	3	5	3	1	1	2	1	1	5	1	3	2	2	2	2	2	2	2	2	2	2	2	2	2	2	2	2	2	2	2	2	2	2	2	2	2	2
10120	1	185	65	19	1	1	4	4	5	4	9	2	1	1	2	1	1	1	1	1	3	2	3	3	2	1	3	3	3	2	3	3	3	1	2	2	1	3	3	1	1	3	1	1	1	3	3	3	3
9366	2	163	51	19	1	1	4	4	5	4	9	2	1	2	2	1	1	1	1	2	3	3	3	3	1	3	3	3	3	2	3	3	2	2	2	2	3	3	2	2	2	3	2	2	2	3	2	2	2
8185	2	168	53	19	1	0	4	4	5	4	9	3	2	3	2	1	1	1	1	1	3	2	2	2	2	2	2	2	2	2	2	2	3	2	2	2	1	3	2	2	2	2	1	2	2	2	2	2	1
8833	2	160	53	19	1	0	4	4	5	4	9	3	2	2	2	1	1	1	1	1	5	2	2	2	2	2	2	2	2	2	2	2	2	2	2	2	2	2	2	2	2	2	2	2	2	2	2	2	2
7896	2	175	65	19	1	1	5	5	4	4	8	1	1	2	2	1	2	1	1	1	4	3	1	1	1	1	3	2	3	1	3	2	3	3	3	3	1	3	3	3	3	3	3	1	3	3	3	3	2
8837	2	167	59	19	1	1	5	5	5	5	6	3	4	1	2	3	1	1	1	1	2	2	2	2	2	3	3	3	3	2	2	2	3	2	1	2	1	3	3	2	2	3	2	1	2	3	3	2	1
7401	1	186	85	19	1	1	4	4	4	4	10	2	1	2	2	1	1	1	1	1	3	2	3	3	2	3	3	3	3	3	3	3	3	3	3	3	1	3	3	2	3	3	1	3	3	2	2	2	3
9573	1	175	70	19	1	1	4	4	4	4	10	2	4	2	3	1	1	1	1	1	1	3	3	3	1	2	3	2	3	3	3	3	3	2	3	2	1	1	2	2	2	3	2	3	3	3	3	3	2
10629	1	168	48	19	1	1	4	4	4	4	10	1	1	2	2	3	3	2	4	1	2	1	3	3	2	1	3	3	3	2	2	2	3	2	2	1	1	2	2	2	2	2	1	2	3	2	2	2	2
10536	2	160	53	19	1	0	4	4	4	4	10	2	2	2	2	3	2	2	2	2	2	2	3	3	2	2	2	2	3	2	2	2	2	2	2	2	2	2	2	2	2	2	2	2	2	2	2	2	2
9703	2	167	45	19	1	1	4	5	5	4	8	2	2	4	3	3	2	1	5	1	3	2	2	3	3	1	3	2	2	2	2	2	2	2	2	2	2	3	2	2	2	2	2	2	2	2	2	2	1
12147	1	175	95	19	1	0	4	5	4	4	9	4	4	5	3	4	4	4	4	2	3	2	2	2	2	2	2	2	2	2	2	2	2	2	2	2	2	2	2	2	2	2	2	2	2	2	2	2	2
9033	2	165	50	19	0	0	4	5	4	4	9	2	1	1	2	1	1	1	1	1	1	3	3	3	1	3	3	3	3	1	3	3	1	3	3	3	2	2	2	2	2	3	3	2	2	2	2	2	2
10510	1	184	73	19	1	1	4	5	3	4	10	2	3	3	3	3	3	3	3	1	1	2	2	2	2	2	2	2	2	2	2	2	2	2	2	2	2	2	2	2	2	2	2	2	2	2	2	2	2
1554	2	163	50	19	1	0	4	5	4	5	8	2	2	2	2	1	1	1	1	1	3	2	2	2	2	2	2	2	2	2	2	2	2	2	2	2	2	2	2	2	2	2	2	2	2	2	2	2	2
7126	2	168	60	19	1	1	3	5	3	5	10	1	1	4	1	4	1	1	1	1	5	1	1	2	2	1	1	2	2	2	2	2	2	2	2	2	1	3	2	1	2	3	2	2	2	3	2	2	2
8754	2	164	75	19	1	0	3	5	3	5	10	2	1	3	2	2	2	1	1	1	5	2	2	2	2	2	2	2	2	2	2	2	2	2	2	2	2	2	2	2	2	2	2	2	2	2	2	2	2
8755	2	164	75	19	1	0	3	5	3	5	10	2	1	3	2	2	2	1	1	1	5	2	2	2	2	2	2	2	2	2	2	2	2	2	2	2	2	2	2	2	2	2	2	2	2	2	2	2	2
8938	2	158	47	19	1	1	5	3	5	2	10	2	2	2	2	1	1	1	5	1	2	3	3	3	1	2	3	3	3	2	3	3	3	2	1	2	1	2	3	3	3	3	2	2	2	3	3	3	3
7807	1	176	73	19	1	1	6	4	5	3	7	3	2	2	3	1	1	2	2	1	1	3	2	2	2	2	3	3	2	2	2	2	3	2	1	3	2	2	3	3	2	2	3	2	2	2	2	2	2
9632	2	168	52	19	1	1	6	4	6	4	5	2	2	2	3	2	2	1	1	1	2	2	2	2	2	2	3	3	3	2	2	2	3	2	2	1	1	3	2	2	2	3	1	2	2	2	2	2	2
9122	2	158	50	19	1	1	6	4	4	3	8	4	3	4	3	2	2	2	1	1	5	3	2	3	1	1	3	1	2	2	2	2	3	3	3	3	1	3	3	3	3	3	1	3	3	3	2	3	3
9796	1	183	110	19	1	1	6	4	4	4	7	3	2	3	2	2	1	2	2	1	3	2	2	2	3	1	2	2	2	3	2	2	2	2	1	2	1	3	2	2	1	2	1	2	2	3	2	2	2
8787	1	175	88	19	1	1	5	4	5	3	8	3	3	3	3	3	3	3	3	3	1	2	2	2	2	2	2	2	2	2	2	2	2	2	2	2	2	2	2	2	2	2	2	2	2	2	2	2	2
7493	1	184	80	19	1	1	5	4	4	3	9	3	2	3	3	1	1	1	1	1	3	3	3	3	1	3	3	3	3	1	3	3	1	3	3	3	3	1	3	3	3	3	3	3	3	3	3	3	3
7209	1	198	105	19	1	1	5	4	5	4	7	3	1	1	3	1	1	1	1	1	1	3	3	3	1	1	3	3	3	1	3	3	1	3	3	3	3	2	3	3	3	3	1	2	3	3	3	3	3
8976	1	175	95	19	1	1	5	4	5	4	7	2	2	1	2	1	1	1	1	1	2	2	2	2	2	2	2	2	2	2	2	2	2	2	2	2	2	2	2	2	2	3	2	3	2	2	3	2	2
7459	2	170	75	19	1	1	5	4	5	4	7	3	1	2	2	1	1	1	1	1	3	2	2	2	2	2	2	2	2	2	2	2	2	2	2	2	1	2	1	2	2	2	1	1	2	2	1	2	1
10731	1	160	75	19	1	1	5	4	5	4	7	3	3	2	3	2	2	1	1	1	3	2	3	3	2	2	3	2	3	2	3	3	2	3	2	2	1	2	2	2	2	2	2	2	2	2	2	2	2
10160	1	178	72	19	1	1	5	4	5	4	7	2	1	3	2	1	1	1	1	1	5	2	3	2	2	2	2	2	2	1	2	2	2	3	3	3	1	3	3	3	3	3	1	3	3	3	3	3	1
9832	1	175	70	19	1	1	5	4	5	4	7	3	3	2	3	2	1	2	1	1	3	1	1	1	3	1	1	2	2	2	2	2	3	2	1	1	1	2	2	2	2	2	2	2	2	2	2	2	2
7630	2	164	66	19	1	1	5	4	5	4	7	1	1	2	1	2	1	2	2	1	1	2	2	2	2	1	2	2	2	2	2	2	2	2	2	2	2	3	2	2	2	2	2	2	2	2	2	2	2
10768	2	169	63	19	1	1	5	4	5	4	7	2	2	3	3	1	2	2	1	1	3	2	2	2	2	1	2	2	2	2	2	2	3	2	2	2	1	3	2	2	2	2	1	1	2	2	2	2	2
10904	2	168	60	19	1	1	5	4	5	4	7	3	2	4	2	2	2	2	2	2	1	3	3	3	1	3	3	3	3	1	3	3	1	3	3	3	3	2	3	3	3	3	3	3	3	3	3	3	3
7023	2	165	60	19	1	1	5	4	5	4	7	2	1	4	3	1	3	1	1	1	5	3	3	3	1	3	3	3	3	3	3	3	3	3	3	3	3	3	1	2	1	1	1	3	3	3	3	3	3
7994	1	175	55	19	1	1	5	4	5	4	7	2	2	4	2	2	1	1	1	1	1	3	3	3	1	3	3	3	3	1	3	3	2	3	3	3	2	3	3	3	1	3	1	3	3	3	3	3	3
9386	2	165	55	19	0	1	5	4	5	4	7	3	2	2	3	2	2	2	2	1	4	2	2	2	2	1	2	2	2	2	3	2	2	2	1	1	1	2	1	1	2	2	1	1	2	2	1	2	1
8299	2	160	55	19	1	1	5	4	5	4	7	3	2	2	2	1	1	1	1	1	1	2	2	2	2	2	2	2	2	2	2	2	3	2	2	2	2	2	2	2	2	2	2	2	2	2	2	2	2
8516	2	168	52	19	1	1	5	4	5	4	7	3	3	2	2	2	3	3	2	1	1	2	3	3	3	2	3	3	2	1	3	3	2	3	3	2	1	2	3	3	2	2	2	2	3	3	3	3	3
9533	2	163	50	19	1	1	5	4	5	4	7	3	2	3	3	2	4	3	1	1	3	3	3	3	1	1	3	2	2	2	3	3	2	2	3	2	1	3	3	3	2	3	2	3	3	3	3	3	3
10344	2	172	110	19	1	0	5	4	5	4	7	4	4	4	4	4	3	3	3	3	4	2	2	2	2	2	2	2	2	2	2	2	2	2	2	2	2	2	2	2	2	2	2	2	2	2	2	2	2
7278	1	180	75	19	1	0	5	4	5	4	7	5	5	4	4	4	4	4	4	1	5	2	2	2	3	1	1	1	1	2	2	2	2	2	2	2	2	3	1	1	2	1	1	2	1	2	2	1	1
8052	1	170	71	19	1	0	5	4	5	4	7	3	1	2	2	1	1	1	1	1	5	2	2	2	2	2	2	2	2	2	2	2	2	2	2	2	2	2	2	3	2	2	2	2	2	2	2	2	2
7649	2	165	62	19	1	0	5	4	5	4	7	3	3	3	2	2	3	2	1	1	3	2	2	3	1	2	3	2	1	1	2	3	1	3	1	2	1	3	2	3	2	2	1	1	3	2	1	3	1
9373	2	165	51	19	1	0	5	4	5	4	7	2	1	1	2	1	1	1	1	1	2	2	2	2	2	2	2	2	2	2	2	2	3	1	1	1	1	3	2	1	2	2	2	2	2	2	2	2	2
11228	2	164	50	19	1	0	5	4	5	4	7	2	3	3	2	1	1	1	1	1	2	2	2	2	2	2	2	2	2	2	2	2	2	2	2	1	1	3	2	1	2	2	2	2	2	2	2	2	1
9979	2	162	48	19	1	0	5	4	5	4	7	3	2	4	3	2	1	1	2	1	3	2	2	1	2	1	1	1	1	2	2	1	3	1	1	1	1	3	1	3	2	2	2	1	2	2	2	2	1
8376	2	160	47	19	1	0	5	4	5	4	7	1	2	2	1	3	2	2	2	2	2	2	2	2	2	2	2	2	2	2	2	2	2	2	2	2	2	2	2	2	2	2	2	2	2	2	2	2	2
10841	2	166	68	19	1	1	5	4	4	4	8	2	2	2	2	1	1	1	1	1	1	3	3	3	1	3	3	3	3	1	3	3	1	3	3	3	3	1	3	3	3	3	3	3	3	3	3	3	3
8913	2	173	63	19	1	1	5	4	4	4	8	1	1	5	2	1	1	1	1	1	2	3	3	3	2	2	3	3	3	3	3	3	3	3	3	1	2	3	3	1	2	3	2	3	3	3	3	3	2
9550	2	165	48	19	1	1	5	4	4	4	8	2	3	3	2	1	1	1	1	1	1	3	3	3	1	3	3	3	3	3	3	3	3	2	2	2	2	2	2	1	3	3	3	3	3	3	3	3	3
7768	1	177	60	19	1	1	5	5	4	3	8	2	2	1	2	1	1	1	1	1	5	2	2	2	2	1	3	2	2	2	2	2	2	2	2	2	1	3	2	3	2	2	1	1	1	2	2	2	1
7285	2	169	55	19	1	1	5	5	4	3	8	2	2	2	2	2	3	2	2	1	5	2	3	3	2	3	2	3	3	1	2	2	2	2	2	2	2	2	3	2	2	3	2	2	2	2	2	3	2
7507	1	178	64	19	1	1	5	4	5	5	6	3	2	3	2	2	2	2	2	1	1	2	2	2	2	2	2	2	2	2	2	2	2	2	2	2	2	2	2	2	2	2	2	2	2	2	2	2	2
8044	2	160	80	19	1	1	5	5	5	4	6	3	1	3	3	2	2	2	1	1	1	3	2	2	2	1	2	2	3	2	2	2	2	2	1	2	1	3	2	2	2	2	2	2	2	2	2	2	1
9216	2	172	60	19	1	1	5	5	5	4	6	2	2	3	2	3	3	3	3	3	3	2	2	2	2	2	2	2	2	2	2	2	2	2	2	2	2	2	2	2	2	2	2	2	2	2	2	2	2
8626	2	168	55	19	1	1	5	5	5	4	6	3	1	3	3	3	3	3	3	3	5	2	2	3	3	2	2	2	2	2	2	2	2	2	3	3	2	2	3	2	2	3	2	2	2	2	2	2	2
6970	2	162	53	19	1	0	4	3	4	4	10	2	4	1	2	2	2	2	2	1	3	2	2	2	2	2	2	2	2	2	2	2	2	2	2	2	2	2	2	2	2	2	2	2	2	2	2	2	2
8869	2	164	47	19	1	1	5	4	4	5	7	2	1	1	2	1	1	1	1	1	1	3	3	3	1	3	2	2	3	3	3	3	3	2	1	2	1	3	3	2	3	3	1	1	3	3	3	3	2
7788	1	178	64	19	1	1	4	4	5	4	8	2	2	1	2	1	1	1	1	1	1	1	1	1	3	1	1	1	1	3	1	1	3	1	1	1	1	3	1	1	1	1	1	1	1	1	1	1	1
8316	1	165	55	19	1	1	4	4	5	4	8	2	1	1	2	2	2	2	2	2	2	2	2	2	2	2	2	2	2	2	2	2	2	2	2	2	2	2	2	2	2	2	2	2	2	2	2	2	2
8222	2	162	52	19	1	1	4	4	5	4	8	4	4	3	3	1	1	1	1	1	3	3	3	2	3	1	3	2	2	1	2	2	3	1	1	2	1	3	3	1	2	3	2	3	3	3	2	3	2
9764	2	158	40	19	1	1	4	4	5	4	8	4	1	3	2	1	1	1	1	1	5	3	3	3	1	1	3	3	2	2	2	3	1	2	1	1	1	1	3	3	3	1	1	1	3	1	3	3	2
8458	2	161	52	19	1	1	5	5	4	4	7	1	5	4	2	1	2	4	4	1	1	2	2	2	1	2	3	3	3	2	2	3	2	3	1	3	1	3	2	1	2	2	1	1	2	2	2	3	2
7066	1	175	70	19	1	1	4	4	4	4	9	3	2	2	2	2	3	3	2	1	2	3	3	2	1	2	3	2	3	2	2	2	1	3	2	2	1	3	2	2	2	2	2	3	1	3	2	2	2
10936	1	179	70	19	1	1	3	4	5	4	9	2	1	2	2	2	1	1	1	1	2	1	2	2	3	1	3	2	2	2	2	2	3	1	2	2	1	3	2	2	1	2	1	1	2	3	2	3	1
10010	2	163	70	19	1	1	4	5	4	5	7	2	2	1	2	1	1	2	1	1	1	2	2	2	2	2	2	2	2	2	2	2	2	2	1	2	1	3	2	2	2	2	1	2	2	3	3	3	2
7992	2	169	51	19	1	0	4	5	4	5	7	3	3	3	2	3	2	3	2	1	5	2	2	3	1	1	3	2	2	2	3	3	3	3	3	3	1	3	3	3	2	3	2	3	3	3	3	3	1
7176	1	178	78	19	1	1	3	5	3	5	9	2	1	1	2	1	1	1	1	1	2	2	3	2	1	3	3	3	2	1	2	2	3	1	1	2	1	2	2	3	2	2	3	3	3	2	3	3	1
8307	2	165	50	19	0	0	2	5	3	5	10	1	1	1	1	1	1	1	1	1	1	2	2	2	2	2	2	2	2	2	2	2	2	2	2	2	2	2	2	2	2	2	2	2	2	2	2	2	2
7652	1	180	74	19	1	1	5	2	5	3	9	2	2	3	2	3	3	3	3	3	1	2	2	2	2	2	2	2	2	2	2	2	3	2	2	2	2	2	2	2	2	2	2	2	2	2	2	2	2
10513	2	155	53	19	1	1	5	2	5	3	9	3	2	3	2	1	1	1	1	1	3	2	2	3	2	2	2	2	3	3	2	3	3	1	1	2	1	3	2	2	2	3	3	2	3	3	2	3	1
10169	2	162	53	19	1	1	5	4	5	1	9	3	2	3	3	1	2	1	3	1	5	2	3	3	2	2	3	2	2	3	3	3	2	2	3	2	2	3	3	3	3	2	2	3	3	3	3	3	3
9260	2	165	65	19	1	1	5	4	4	1	10	3	2	1	2	2	2	2	1	1	1	2	2	2	3	1	3	2	3	3	2	2	3	1	2	1	1	2	2	2	2	3	1	1	2	3	2	2	2
8144	1	180	84	19	1	1	5	3	5	3	8	3	2	1	2	1	1	1	1	1	1	2	3	3	2	3	3	3	3	2	3	3	3	2	3	2	1	3	3	3	3	3	1	3	3	3	3	3	3
8796	1	181	74	19	1	1	5	3	5	3	8	3	1	3	2	3	1	1	1	1	1	1	3	3	2	3	3	3	3	3	3	3	3	2	2	3	1	3	2	3	2	2	1	2	3	3	3	3	1
7379	2	165	66	19	1	1	5	3	5	3	8	1	1	1	1	1	1	1	1	1	1	1	1	1	3	1	1	1	1	3	1	1	3	1	1	1	1	3	1	1	1	1	1	1	1	1	1	1	1
10769	2	163	50	19	1	1	5	3	5	3	8	4	2	2	2	2	1	1	1	1	2	2	2	2	2	2	2	2	2	2	2	2	2	2	1	2	1	3	2	2	2	2	2	2	2	2	2	2	1
9594	1	170	73.5	19	1	0	5	5	5	1	8	3	2	4	3	3	1	1	1	1	3	2	2	2	2	3	3	3	3	2	2	2	3	2	2	2	1	2	2	2	3	3	1	3	3	3	3	3	3
7734	1	181	81	19	1	1	5	3	4	3	9	2	3	1	2	1	1	1	1	1	1	2	2	2	2	2	2	2	2	2	2	2	2	2	2	2	2	2	2	2	2	2	2	2	2	2	2	2	2
11245	1	175	58	19	1	1	5	4	4	2	9	2	2	2	2	1	1	1	1	1	1	2	2	2	2	2	2	2	2	2	2	2	2	2	2	2	2	2	2	2	2	2	2	2	2	2	2	2	2
7982	2	161	50	19	1	1	5	4	4	2	9	3	2	2	2	1	1	1	1	1	3	1	3	3	2	2	3	2	3	2	3	3	2	2	3	2	2	3	3	3	2	3	2	2	2	2	3	3	2
11470	2	162	52	19	1	1	5	3	5	4	7	2	1	3	3	3	3	3	2	1	1	1	2	2	2	2	2	2	2	2	2	2	2	2	2	2	2	2	2	2	2	2	2	2	2	2	2	2	2
8320	2	158	48	19	1	1	5	3	5	4	7	2	1	2	2	1	2	1	1	1	3	2	2	2	2	2	2	2	2	2	2	2	2	2	2	2	2	2	2	2	2	2	2	2	2	2	2	2	2
9497	1	175	80	19	1	1	5	4	5	3	7	3	3	2	2	3	3	3	3	3	1	2	2	2	2	2	2	2	2	2	2	2	2	2	2	2	2	2	2	2	2	2	2	2	2	2	2	2	2
7851	2	160	50	19	1	1	5	4	5	3	7	3	2	2	2	1	1	1	1	1	3	3	3	3	2	2	3	3	3	1	3	3	3	2	3	1	1	3	3	3	2	3	1	2	3	2	3	3	1
7903	2	178	120	19	1	1	4	2	5	4	9	3	2	1	3	1	3	3	2	1	5	2	3	3	2	3	3	3	3	2	3	3	2	2	2	2	1	3	2	2	1	3	2	2	3	2	3	2	2
10709	1	178	68	19	1	1	4	2	5	4	9	3	4	5	2	3	1	1	1	1	5	2	3	3	1	3	3	3	2	2	3	3	2	3	3	3	1	3	3	3	3	3	2	3	3	3	3	3	1
8918	1	180	90	19	1	0	5	3	4	4	8	2	2	2	2	1	1	1	1	1	1	2	2	2	2	2	2	2	2	2	2	2	2	2	2	2	2	2	2	2	2	2	2	2	2	2	2	2	2
10043	1	173	90	19	1	1	4	3	5	3	9	2	2	2	2	1	1	1	1	1	2	2	2	2	2	2	2	2	2	2	2	2	2	2	2	2	2	2	2	2	2	2	2	2	2	2	2	2	2
10044	1	173	90	19	1	1	4	3	5	3	9	2	2	2	2	1	1	1	1	1	2	2	2	2	2	2	2	2	2	2	2	2	2	2	2	2	2	2	2	2	2	2	2	2	2	2	2	2	2
8433	2	166	55	19	1	1	5	4	4	3	8	3	1	3	2	2	1	2	2	1	5	3	3	3	2	2	3	3	3	2	3	3	3	2	3	3	2	2	2	2	2	3	3	2	3	3	3	3	2
8690	2	165	110	19	1	1	5	4	5	4	6	2	2	3	3	1	1	1	1	1	1	2	2	2	2	2	2	2	1	3	3	3	2	1	1	1	1	3	2	2	2	2	2	1	2	2	2	2	1
10891	1	178	85	19	1	1	5	4	5	4	6	3	2	1	2	1	1	1	1	1	1	2	2	2	2	2	2	2	2	2	2	2	2	2	2	2	2	2	2	2	2	2	2	2	2	2	2	2	2
7587	1	183	72	19	1	1	5	4	5	4	6	2	1	2	2	1	1	1	1	1	1	1	3	3	2	2	3	3	3	3	3	3	3	3	3	3	3	2	3	2	2	3	3	2	3	2	2	2	2
7881	2	160	65	19	1	1	5	4	5	4	6	3	2	5	2	1	1	1	1	1	1	1	2	2	3	1	3	3	2	1	3	3	2	2	1	1	1	3	3	3	3	3	1	1	3	3	3	3	2
9013	2	168	63	19	1	1	5	4	5	4	6	2	1	1	2	1	1	1	1	1	3	2	2	2	2	2	2	2	2	2	2	2	2	2	2	2	2	2	2	2	2	2	2	2	2	2	2	2	2
7528	1	170	60	19	0	1	5	4	5	4	6	3	2	3	2	4	2	2	1	1	2	2	2	1	1	1	3	2	2	2	3	2	2	2	3	2	1	3	1	2	1	2	1	1	2	2	2	1	1
9183	2	165	55	19	1	1	5	4	5	4	6	3	3	3	3	4	1	1	1	1	2	1	3	3	1	3	2	2	2	3	3	3	2	2	3	2	2	3	3	3	3	2	2	3	3	3	3	3	3
7657	2	168	53	19	1	1	5	4	5	4	6	2	4	2	3	1	1	1	1	1	5	2	2	2	2	2	2	2	2	2	2	2	3	1	2	1	2	2	2	2	2	2	2	2	2	3	2	2	2
7380	2	180	45	19	1	0	5	4	5	4	6	3	2	2	3	3	3	3	3	3	3	2	2	2	2	2	2	2	2	2	2	2	2	2	2	2	2	2	2	2	2	2	2	2	2	2	2	2	2
9755	2	163	47	19	0	0	4	2	4	4	10	4	2	3	3	3	1	2	1	1	4	1	2	2	2	1	2	2	2	3	2	2	2	2	2	1	2	3	2	2	2	2	1	2	2	2	2	2	2
10192	1	183	80	19	1	1	4	3	5	4	8	3	4	4	3	3	3	3	3	2	2	2	2	2	2	2	2	2	2	2	2	2	2	2	2	2	2	2	2	2	2	2	2	2	2	2	2	2	2
10717	1	170	58	19	1	1	4	3	5	4	8	3	2	2	3	1	1	1	1	1	1	2	3	2	2	1	2	2	2	3	2	2	3	1	1	2	1	3	1	2	2	2	2	1	2	2	2	2	2
7341	1	180	87	19	1	0	4	5	4	1	10	2	1	1	2	1	1	1	1	1	2	3	3	3	2	3	1	2	2	3	3	3	1	2	1	1	1	3	3	2	3	3	1	3	3	3	3	3	3
8189	1	183	75	19	1	1	5	4	4	4	7	2	1	1	2	2	2	2	2	1	1	2	2	3	2	2	2	3	3	1	3	3	3	3	3	2	1	2	3	2	2	3	2	3	3	3	2	3	3
7832	2	167	67	19	1	1	5	4	4	4	7	2	2	1	2	1	1	1	1	1	1	3	3	3	2	1	3	3	3	2	3	3	2	3	3	3	1	3	3	3	3	3	1	3	2	3	3	3	2
10818	1	170	55	19	1	1	5	4	4	4	7	1	1	3	2	2	2	2	2	1	1	2	1	2	2	1	2	2	3	2	3	1	2	2	2	2	2	2	2	2	2	2	2	2	2	2	2	2	2
10562	2	161	54	19	1	1	5	4	4	4	7	2	4	3	2	1	1	1	1	1	5	1	2	2	2	2	2	2	2	2	2	2	2	2	2	2	2	2	2	2	2	2	2	2	2	2	2	2	2
10564	1	176	74	19	1	1	4	4	5	3	8	4	2	3	2	2	1	2	1	1	1	3	3	3	2	3	3	3	3	2	3	3	3	2	3	2	1	2	2	2	3	3	2	3	2	2	3	3	3
8249	2	163	47	19	1	1	5	5	4	3	7	2	2	2	2	1	1	1	1	1	1	3	3	3	1	2	3	3	3	2	3	3	3	2	3	3	2	3	2	3	3	3	3	2	3	3	3	3	2
7430	2	170	53	19	1	1	5	5	5	4	5	2	1	1	2	1	1	1	1	1	1	2	2	2	2	2	2	2	2	2	2	2	2	2	2	2	2	2	2	2	2	2	2	2	2	2	2	2	2
7509	1	188	113	19	0	1	4	5	4	2	9	2	1	4	2	1	1	1	1	1	1	3	3	3	1	2	3	3	3	3	3	3	3	3	1	2	1	2	3	2	3	3	1	3	3	3	3	3	3
10252	1	180	65	19	1	1	5	5	4	4	6	3	3	2	1	1	1	1	1	1	1	3	3	3	1	3	3	3	3	1	3	3	1	3	3	3	3	1	3	3	3	3	3	3	3	3	3	3	3
6865	2	165	50	19	1	1	4	4	4	4	8	2	2	2	2	1	1	1	1	1	1	1	3	3	1	3	3	3	3	1	3	3	1	3	3	3	3	1	3	3	3	3	3	3	3	3	3	3	3
7870	2	158	50	19	1	1	4	4	4	4	8	3	3	3	2	1	1	1	1	1	2	2	3	3	2	2	3	3	3	2	3	3	3	2	3	3	1	3	2	2	2	2	1	3	3	3	3	3	3
10610	2	157	43	19	1	1	4	4	4	4	8	2	4	3	2	1	2	3	2	1	5	2	2	2	2	2	2	2	2	2	2	2	2	2	2	2	2	2	2	2	2	2	2	2	2	1	2	2	2
8397	1	170	59	19	1	0	4	4	4	4	8	3	3	3	3	3	3	3	3	1	2	2	2	2	2	2	2	2	2	2	2	2	2	2	2	2	2	2	2	2	2	2	2	2	2	2	2	2	2
9702	2	152	45	19	1	0	4	4	4	4	8	3	2	4	3	2	2	2	2	1	1	2	2	2	2	2	2	2	2	2	2	2	2	2	2	2	2	2	2	2	2	2	2	2	2	2	2	2	2
8637	2	160	70	19	1	0	4	4	5	5	6	4	2	2	2	3	3	3	3	3	2	2	2	2	2	2	2	2	2	2	2	2	2	2	2	2	2	2	2	2	2	2	1	2	2	2	2	2	2
10940	2	169	50	19	1	1	3	2	4	5	10	2	2	3	2	1	3	1	3	1	1	1	2	2	2	1	2	2	2	2	2	2	3	2	2	1	1	2	2	2	2	2	2	2	2	2	2	2	1
8683	2	171	75	19	1	1	4	5	5	4	6	2	2	3	3	1	1	1	1	1	2	2	2	2	1	3	3	3	3	2	3	3	2	2	2	1	1	3	2	2	2	2	1	3	3	3	3	3	2
10122	2	167	78	19	1	0	4	5	5	4	6	2	2	2	2	3	4	4	1	1	2	2	2	3	2	2	2	3	3	3	3	3	3	2	3	2	1	2	3	1	2	2	2	2	3	3	2	3	3
8230	2	161	52	19	1	1	4	5	5	5	5	4	4	5	3	5	1	1	1	1	3	2	2	2	2	1	3	2	2	2	3	3	2	2	1	2	3	2	3	3	3	3	3	3	3	2	3	3	3
11321	1	176	60	19	1	1	4	5	4	5	6	2	4	2	2	1	1	5	1	1	1	1	3	3	2	3	1	2	3	3	3	3	3	1	2	1	1	2	3	1	2	3	1	3	3	3	3	3	3
7695	1	172	57	19	1	1	4	5	3	5	7	2	2	2	2	2	2	2	1	1	3	2	2	2	2	2	2	2	2	2	2	2	2	2	2	2	2	2	2	2	2	2	2	2	2	2	2	2	2
9715	1	170	60	19	1	1	5	2	5	2	9	2	1	1	2	1	1	1	1	1	1	2	3	3	1	1	3	2	3	2	2	2	3	2	2	3	2	2	2	2	2	3	2	2	3	2	2	2	2
9647	1	174	67	19	1	1	5	2	4	2	10	3	2	1	2	2	1	2	1	1	5	2	1	3	2	1	2	3	3	2	3	3	2	2	1	2	1	2	2	2	2	2	1	1	2	3	2	2	1
9502	1	178	64	19	1	1	5	3	5	2	8	3	2	3	3	1	1	1	1	1	1	2	2	2	2	1	2	2	2	3	2	2	3	2	2	2	2	2	2	2	2	2	2	2	2	2	2	2	2
7878	2	160	58	19	1	1	4	2	5	2	10	3	3	4	3	1	1	3	1	1	5	2	2	2	1	2	3	3	2	2	3	3	2	2	1	1	1	3	2	3	2	3	2	2	3	3	2	3	2
7601	2	168	64	19	1	1	5	2	5	4	7	3	2	3	2	2	1	1	1	1	5	2	3	3	2	1	3	3	2	2	3	3	2	1	2	1	1	3	3	3	1	3	2	3	3	3	3	3	3
8209	1	176	60	19	1	1	5	4	4	1	9	2	1	3	2	1	1	1	3	1	1	2	3	3	3	1	3	1	3	1	3	3	3	3	3	3	3	3	3	3	3	3	1	1	3	3	3	3	3
7527	1	199	75	19	1	1	5	3	5	3	7	4	4	4	4	4	4	4	4	4	4	2	2	2	2	2	2	2	2	2	2	2	2	2	2	2	2	2	2	2	2	2	2	2	2	2	2	2	2
8349	1	173	68	19	1	1	5	3	5	3	7	2	1	3	3	1	1	1	1	1	1	2	2	2	2	2	2	2	2	2	2	2	2	2	2	2	2	2	2	2	2	2	2	2	2	2	2	2	2
9315	1	170	55	19	1	1	5	3	5	3	7	2	2	3	1	2	2	2	2	2	3	2	2	2	2	2	2	2	2	2	2	2	2	2	2	2	2	2	2	2	2	2	2	2	2	2	2	2	2
7607	1	188	96	19	1	1	5	2	4	4	8	3	2	2	2	2	3	1	1	1	5	3	3	3	2	2	3	2	3	2	3	3	3	2	1	2	1	3	3	3	2	3	1	3	3	3	2	3	1
10954	1	170	57	19	0	0	5	3	4	3	8	3	3	3	2	5	5	5	5	1	5	3	3	3	1	3	3	3	3	1	3	3	3	3	3	3	3	2	2	2	2	3	2	2	2	3	2	3	2
9899	1	171	49	19	1	1	5	3	5	4	6	2	1	1	2	1	1	2	3	1	3	2	3	3	1	2	2	2	2	2	2	2	2	2	2	2	1	3	2	2	2	3	3	3	3	3	2	2	1
8798	2	170	56	19	1	1	5	5	4	1	8	2	1	3	2	1	2	2	1	1	3	2	2	2	2	2	2	2	2	2	2	2	2	2	2	2	2	2	2	2	2	2	2	2	2	2	2	2	2
8894	2	169	56	19	1	1	6	4	4	4	5	2	1	2	2	1	1	1	1	1	1	3	3	3	3	3	3	3	3	2	2	2	2	2	2	2	1	2	2	2	2	3	2	2	2	3	3	3	3
8264	2	162	58	19	1	1	4	3	4	2	10	3	2	3	2	2	1	2	1	1	3	2	2	2	2	2	2	2	2	2	2	2	3	1	1	2	1	3	2	2	1	3	2	2	2	3	3	3	2
7879	2	170	60	19	1	1	4	2	5	4	8	2	4	2	2	1	1	1	1	1	1	2	3	3	1	2	3	3	3	2	3	3	3	2	1	2	1	3	3	3	2	3	2	2	3	2	3	3	2
8250	2	165	53	19	1	1	4	3	5	3	8	3	3	4	2	1	1	1	1	1	3	2	2	2	2	2	2	2	2	2	2	2	2	2	2	2	2	2	2	2	2	2	2	2	2	2	2	2	2
8792	2	160	100	19	1	1	5	4	4	3	7	3	3	3	2	4	5	4	4	4	3	2	3	2	1	2	3	3	2	2	3	3	2	2	2	2	1	3	1	3	2	2	2	2	3	3	2	3	3
7632	1	178	73	19	1	1	5	4	4	3	7	3	3	3	2	1	2	1	1	1	2	2	2	2	3	1	2	2	2	3	2	2	2	2	1	2	1	3	2	2	2	1	2	2	2	2	2	2	1
7525	2	163	46	19	1	1	5	4	4	3	7	3	2	2	2	1	1	2	1	1	3	2	3	2	2	1	2	2	3	2	3	3	3	1	1	2	1	3	2	2	2	3	2	2	2	2	2	3	2
7909	2	170	75	19	1	1	3	1	5	4	10	2	2	2	2	1	1	1	1	1	5	2	3	2	2	3	3	3	3	1	2	3	2	2	2	2	1	2	3	2	1	2	1	2	3	3	3	2	3
7910	2	170	75	19	1	1	3	1	5	4	10	2	2	2	2	1	1	1	1	1	5	2	3	2	2	3	3	3	3	1	2	3	2	2	2	2	1	2	3	2	1	2	1	2	3	3	3	2	3
8258	1	178	95	19	1	1	5	4	5	4	5	3	3	5	3	1	1	1	1	1	5	2	2	2	2	2	2	2	2	2	2	2	2	2	2	2	2	2	2	2	2	2	2	2	2	2	2	2	2
8344	1	180	75	19	1	1	5	4	5	4	5	3	3	1	2	2	1	1	1	1	1	2	2	2	2	2	2	2	2	2	2	2	3	2	2	2	1	3	2	2	2	2	2	2	2	2	2	2	2
9067	2	159	62	19	1	1	5	4	5	4	5	4	3	2	3	3	2	4	2	4	3	3	3	3	2	2	3	3	2	3	3	3	2	3	3	3	2	2	3	1	3	3	3	3	3	3	3	3	1
9924	2	172	60	19	1	1	5	4	5	4	5	3	2	4	2	3	1	1	1	1	2	2	3	3	1	1	3	2	2	1	3	3	1	1	3	3	1	1	3	3	3	3	3	3	3	3	3	3	3
8300	2	165	50	19	1	1	5	4	5	4	5	2	4	2	2	2	2	2	2	1	3	3	3	3	2	2	2	2	2	2	3	3	2	2	3	2	2	3	2	3	2	2	2	2	3	3	2	3	2
9805	2	164	46	19	1	1	5	4	5	4	5	2	1	2	2	1	1	1	1	1	1	2	2	2	2	2	2	2	2	2	2	2	3	1	1	1	1	2	2	1	1	2	2	2	2	2	2	2	2
12329	2	165	75	19	1	0	5	4	5	4	5	3	2	3	3	1	2	2	1	1	5	3	3	3	2	2	3	3	3	1	3	3	3	2	2	2	1	3	2	3	2	3	2	2	3	2	3	3	3
12386	1	165	63	19	1	0	5	4	5	4	5	2	1	2	2	1	1	5	1	1	1	3	3	3	3	3	3	3	3	3	3	3	3	3	3	3	1	3	3	3	3	3	3	3	3	3	3	3	1
7906	2	153	50	19	1	0	5	4	5	4	5	3	3	4	3	4	2	2	3	4	4	2	2	2	2	2	2	2	2	2	2	2	2	2	2	2	1	3	1	2	2	2	1	2	2	2	2	2	2
8297	2	158	59	19	1	1	4	2	4	4	9	1	1	1	2	1	1	1	1	1	1	2	3	3	1	3	3	2	3	1	3	3	3	2	1	2	1	2	1	3	2	3	3	2	2	2	2	3	2
10683	1	176	65	19	1	1	4	3	4	3	9	3	2	2	3	1	1	1	1	1	5	2	2	3	2	3	3	3	2	2	2	2	3	2	2	2	1	2	2	2	2	2	1	2	2	2	2	2	3
9274	1	171	65	19	1	1	4	3	4	3	9	2	1	2	2	2	2	2	2	2	3	2	2	2	2	2	2	2	2	2	2	2	2	2	2	2	2	2	2	2	2	2	2	2	2	2	2	2	2
9304	2	157	49	19	1	1	4	3	4	3	9	2	1	3	2	1	1	1	1	1	3	1	1	2	2	1	2	2	3	2	2	2	3	1	1	2	1	2	1	2	2	2	1	1	2	2	2	2	1
10345	1	183.6	100	19	1	0	5	4	3	3	8	5	5	1	3	1	1	1	1	1	1	2	2	2	2	2	2	2	2	2	2	2	2	2	2	2	2	2	2	2	2	2	2	2	2	2	2	2	2
7688	2	163.5	60	19	1	1	5	5	3	2	8	3	3	2	2	2	2	2	2	1	3	2	2	2	2	2	2	2	2	2	2	2	3	2	2	2	2	2	3	1	2	3	2	2	2	2	2	2	2
11231	2	168	46	19	1	1	5	5	3	2	8	5	1	5	2	2	2	2	2	2	3	3	3	3	2	2	2	2	2	2	2	2	2	2	2	2	3	2	2	2	2	2	2	2	2	3	3	3	3
8179	2	175	85	19	1	0	4	3	5	4	7	3	3	4	2	2	1	1	3	1	1	2	3	3	2	1	3	3	2	3	3	3	3	2	2	1	1	3	2	1	3	3	1	1	2	2	3	3	2
7173	1	175	65	19	1	1	5	4	4	4	6	3	3	3	2	1	2	5	1	1	2	3	3	3	1	1	2	2	2	2	2	2	2	2	2	2	2	2	2	2	2	2	2	2	2	2	2	2	2
12092	2	164	70	19	1	0	5	4	4	4	6	3	3	3	2	4	1	2	2	1	3	3	3	3	1	3	3	2	3	1	3	3	3	2	3	2	2	3	3	3	3	3	3	3	3	3	3	3	3
12093	2	176	130	19	1	1	5	4	5	5	4	3	2	3	3	2	2	3	3	1	3	3	3	3	2	2	2	2	3	2	3	3	2	2	2	1	2	2	2	2	3	3	2	2	3	3	3	3	2
8037	1	181	63	19	1	1	5	5	5	4	4	3	3	3	2	3	3	3	3	3	1	2	2	2	2	2	2	2	2	2	2	2	2	2	2	2	2	2	2	2	2	2	2	2	2	2	2	2	2
10557	1	176	70	19	1	1	4	3	4	4	8	3	1	4	3	1	1	1	1	1	3	2	2	2	2	2	2	2	2	2	2	2	2	2	2	2	2	2	2	2	2	2	2	2	2	2	2	2	2
10274	2	165	60	19	0	0	5	4	3	4	7	2	1	4	3	3	2	3	2	2	5	2	2	2	2	2	2	2	2	2	2	2	2	2	2	2	2	2	2	2	2	2	2	2	2	2	2	2	2
8312	2	163	59	19	1	1	4	4	5	4	6	3	1	3	2	1	1	1	1	1	3	2	3	3	2	1	3	3	3	3	3	3	3	3	3	3	1	3	3	2	3	3	3	3	3	3	3	3	3
7389	2	169	55	19	1	1	4	4	5	4	6	2	2	5	2	2	2	1	2	1	4	2	2	3	2	2	3	3	3	3	3	3	3	3	2	2	1	3	3	1	3	2	1	3	3	3	3	3	3
9014	2	162	75	19	0	0	4	5	3	2	9	3	2	3	2	2	1	1	1	1	1	2	3	3	2	2	3	3	3	3	3	3	3	2	2	1	1	3	3	3	2	3	1	2	3	3	3	3	3
9208	2	160	60	19	0	0	3	5	4	1	10	3	2	3	3	3	2	1	1	1	3	2	2	2	2	2	2	2	2	2	2	2	2	2	2	2	2	3	2	2	2	2	2	2	2	2	2	2	2
9150	2	153	41	19	1	1	4	4	4	4	7	2	2	1	3	1	1	2	3	1	2	2	2	2	2	2	2	2	2	2	2	2	2	2	2	2	2	2	2	2	2	2	2	2	2	2	2	2	2
9976	2	155	40	19	1	1	4	4	4	4	7	2	1	2	1	2	2	2	1	1	1	3	2	2	2	2	2	2	2	2	2	2	2	2	2	2	2	2	2	2	2	2	2	2	2	2	2	2	2
9244	1	177	65	19	1	0	4	4	4	4	7	2	2	3	2	2	2	2	2	2	3	2	2	2	2	2	2	2	2	2	2	2	2	2	2	2	2	2	2	2	2	2	2	2	2	2	2	2	2
7426	2	160	64	19	1	0	4	4	4	4	7	3	4	3	3	3	3	3	3	2	1	2	2	2	2	2	2	2	2	2	2	2	2	2	2	2	2	2	2	2	2	2	2	2	2	2	2	2	2
8031	2	153	45	19	1	0	4	4	4	4	7	2	2	1	2	1	1	1	1	1	1	3	3	3	2	2	3	2	3	2	3	3	3	2	2	1	1	3	2	2	2	3	1	2	3	3	3	3	2
10620	1	166	66	19	1	1	5	5	3	4	6	3	2	2	2	2	2	2	2	1	1	2	2	2	2	2	2	2	2	2	2	2	2	2	2	2	2	2	2	2	2	2	2	2	2	2	2	2	2
9788	2	160	51	19	1	0	4	5	4	4	6	3	2	2	2	1	1	1	1	1	3	2	2	2	2	2	2	2	2	2	2	2	2	2	2	2	2	2	2	2	2	2	2	2	2	2	2	2	2
10228	2	170	70	19	1	0	3	5	3	5	7	5	3	4	2	1	1	1	1	1	3	3	3	3	2	1	3	3	2	2	3	3	3	2	3	2	2	3	3	3	2	3	2	2	3	3	2	3	2
9097	1	176	160	19	1	1	5	2	5	2	8	4	4	3	2	2	3	3	1	1	3	3	2	3	1	3	3	3	3	2	3	3	3	2	3	3	1	3	3	3	3	3	3	3	3	3	3	3	1
10141	2	168	65	19	1	1	5	2	4	2	9	3	2	3	3	2	1	1	1	1	3	2	2	2	2	2	2	2	2	3	2	2	3	2	1	2	1	2	2	1	2	2	2	2	2	2	2	2	1
10177	1	180	74	19	1	1	5	1	5	4	7	3	1	2	3	1	1	1	1	1	3	3	3	3	1	1	3	3	3	1	3	3	1	3	3	3	3	1	3	3	3	3	3	3	3	3	3	3	3
8127	2	175	52	19	1	1	5	1	3	3	10	4	2	3	2	3	3	3	3	3	1	2	2	2	2	2	2	2	2	2	2	2	2	2	2	2	2	2	2	2	2	2	2	2	2	2	2	2	2
8388	2	178	116	19	1	0	5	3	5	2	7	3	2	3	3	1	1	1	1	1	3	3	2	2	2	2	2	2	2	2	2	2	3	2	2	2	1	3	2	2	2	3	1	2	3	2	2	2	3
7513	2	160	60	19	1	1	5	4	5	1	7	4	3	3	3	2	2	2	2	1	5	2	2	2	1	2	3	3	2	2	2	3	3	3	3	2	1	3	3	2	2	3	2	3	3	3	2	3	2
8537	1	185	112	19	1	1	5	2	4	3	8	2	2	2	2	1	1	1	1	1	1	2	2	3	1	1	3	3	3	2	3	3	3	2	3	3	1	2	2	2	2	3	1	3	3	2	1	2	1
10721	1	183	65	19	1	1	5	2	5	4	6	5	5	5	4	5	1	1	1	2	1	3	3	3	2	1	3	3	3	1	3	3	3	3	3	3	2	3	3	3	3	3	2	3	3	3	3	3	3
8233	2	165	57	19	1	1	5	2	5	4	6	3	2	3	2	2	1	2	1	1	1	2	2	2	2	2	2	2	2	2	2	2	2	2	2	2	2	2	2	2	2	2	2	2	2	2	2	2	2
9357	2	170	75	19	1	1	5	3	5	3	6	3	4	2	3	2	1	3	1	1	1	3	3	3	2	3	3	2	2	2	2	2	2	2	2	2	2	2	2	2	2	2	2	2	2	2	2	2	2
9912	1	182	65	19	1	1	5	3	5	3	6	3	1	5	3	1	1	1	1	1	1	2	2	2	2	2	2	2	2	2	2	2	1	1	1	1	1	1	2	3	3	3	3	3	3	3	3	3	3
10616	1	169	55	19	1	1	5	3	5	3	6	3	4	3	2	1	1	2	2	1	3	2	2	2	2	1	3	3	2	2	3	3	3	3	3	1	2	1	3	3	3	3	3	3	3	3	3	3	3
6878	1	176	65	19	0	0	4	2	4	2	10	3	2	3	2	2	2	2	2	1	2	2	2	3	3	1	3	2	2	2	3	3	3	2	1	3	2	2	3	2	3	3	1	3	2	2	3	3	1
8528	2	174	87	19	1	1	4	2	5	3	8	3	2	5	3	1	1	1	1	1	5	1	3	3	1	3	3	3	3	3	3	3	2	1	1	2	2	1	3	3	2	2	1	3	3	3	2	3	1
9975	1	178	85	19	1	1	4	2	5	3	8	1	2	3	2	1	1	1	1	1	3	3	3	3	2	2	3	2	2	3	2	2	3	2	3	1	1	3	1	2	2	3	2	3	3	3	2	3	3
7132	2	167	49	19	1	1	5	3	5	4	5	2	2	2	2	1	1	1	1	1	2	3	3	3	1	3	3	3	3	1	3	3	3	3	1	2	1	3	3	1	2	2	2	3	3	3	3	3	2
8711	1	180	58	19	1	1	5	5	4	1	7	4	1	2	3	2	1	1	1	1	3	2	2	2	2	1	2	2	2	2	2	2	3	2	2	1	1	3	2	2	2	2	1	1	2	2	2	2	1
9677	1	177	72	19	1	1	5	4	5	3	5	2	2	2	2	5	5	5	5	5	2	3	3	3	1	3	3	3	3	1	3	3	1	3	3	3	3	1	3	3	3	3	3	3	3	3	3	3	3
8861	1	165	56	19	1	1	4	2	5	4	7	3	2	3	2	2	2	2	2	1	3	3	2	2	3	1	3	3	3	2	3	3	2	1	2	2	1	3	2	1	2	2	1	3	3	3	3	3	2
9809	1	173	60	19	0	0	4	4	4	1	9	3	3	3	3	1	1	1	1	1	5	2	3	3	2	2	3	2	3	3	3	3	3	2	3	3	1	1	3	3	3	3	3	3	3	3	3	3	3
7086	1	170	64	19	1	0	5	3	4	4	6	3	2	2	2	3	3	3	3	3	2	2	1	2	3	1	2	3	2	3	2	2	3	2	2	2	1	3	2	2	2	2	2	2	2	2	2	2	2
8709	2	158	48	19	1	1	4	3	5	3	7	2	2	2	2	1	1	1	1	1	3	2	2	2	2	2	2	2	2	2	2	2	2	2	2	2	2	2	2	2	2	2	2	2	2	2	2	2	2
9385	1	185	75	19	1	1	5	4	4	3	6	3	1	2	3	1	1	1	1	1	1	3	3	3	1	3	3	3	3	3	3	3	3	3	3	1	1	3	3	3	3	3	1	3	3	3	3	3	1
9120	2	167	55	19	1	0	5	4	4	3	6	3	4	3	3	2	1	1	1	1	1	1	3	3	2	1	3	2	2	2	2	2	2	2	2	2	1	3	1	1	2	2	2	2	2	2	2	2	2
9824	1	178	90	19	1	0	4	2	3	3	10	3	3	1	3	5	1	5	1	1	4	3	3	3	1	2	2	2	2	2	2	2	2	2	2	2	2	2	2	2	2	2	2	2	2	2	2	2	2
10256	1	181	70	19	1	1	3	1	5	4	9	2	1	2	2	1	1	1	1	1	2	1	1	3	2	1	3	3	3	1	3	3	1	3	3	3	3	3	3	3	3	2	1	3	3	3	3	3	3
7375	2	168	65	19	1	1	3	1	5	4	9	2	2	1	2	2	2	2	2	2	1	2	2	2	2	2	2	2	2	2	2	2	2	2	2	2	2	2	2	2	2	2	2	2	2	2	2	2	2
9551	2	165	49	19	1	1	4	2	4	4	8	2	1	1	1	1	1	1	1	1	1	3	3	3	2	3	3	3	3	2	3	3	3	1	2	2	1	3	3	3	2	3	3	3	3	3	3	3	3
8766	2	168.2	57	19	1	1	4	3	4	3	8	2	2	2	2	2	3	2	2	1	1	2	2	2	2	1	2	2	2	2	2	2	2	2	1	2	1	3	2	2	2	2	2	2	2	2	2	2	2
7626	2	176	53	19	1	1	4	3	4	3	8	3	2	2	2	3	2	2	1	1	3	2	2	2	3	2	2	2	2	2	2	3	3	1	3	3	1	2	2	3	3	3	2	2	3	2	2	3	3
8269	1	172	67	19	1	0	4	3	4	3	8	2	1	1	2	1	1	1	1	1	1	2	2	2	2	2	2	2	2	2	2	2	2	2	2	3	1	3	2	2	1	2	1	2	2	2	2	2	1
8582	1	170	75	19	1	0	4	3	5	4	6	3	2	1	2	1	1	1	1	1	1	3	3	3	3	3	3	3	3	3	3	3	3	3	3	2	2	3	3	3	3	3	3	3	3	3	3	3	3
7885	1	185	80	19	1	1	4	5	4	1	8	5	5	5	3	1	1	1	1	1	1	2	2	2	2	2	2	2	2	2	2	2	2	2	2	2	2	2	2	2	2	2	2	2	2	2	2	2	2
9778	2	161	55	19	0	1	4	4	3	2	9	3	2	3	3	3	3	3	3	3	3	2	2	2	2	2	2	2	2	2	2	2	2	2	2	2	2	2	2	2	2	2	2	2	2	2	2	2	2
7876	2	160	45	19	1	1	4	3	4	4	7	2	1	1	2	2	2	1	1	1	3	2	2	2	2	1	2	2	2	3	2	2	3	2	2	1	1	3	2	2	2	2	1	2	2	2	2	2	2
9969	2	165	60	19	1	0	4	3	4	4	7	3	1	3	2	2	1	3	1	1	1	2	2	2	2	2	2	2	2	2	2	2	2	1	2	2	2	3	2	1	2	2	1	2	2	2	2	2	2
11196	2	159	43	19	1	1	4	4	4	3	7	3	3	2	3	2	2	4	2	1	5	2	3	3	2	2	3	3	3	2	2	2	2	2	2	2	2	2	2	2	2	2	2	2	2	2	2	2	2
7613	2	160	54	19	1	1	4	4	5	4	5	2	1	1	2	1	1	1	1	1	1	2	3	3	2	3	2	3	3	2	3	2	3	2	2	1	1	3	2	2	2	3	2	2	3	2	2	2	2
9425	2	150	50	19	1	1	4	5	5	3	5	4	3	3	3	1	1	1	1	1	3	3	3	3	2	3	3	3	3	3	3	3	3	3	3	2	1	2	2	3	2	2	1	3	3	2	3	3	3
10574	1	173	55	19	1	0	4	4	3	3	8	1	1	1	1	1	1	1	1	1	1	2	2	2	2	2	2	2	2	2	2	2	2	2	2	2	2	2	2	2	2	2	2	2	2	2	2	2	2
9089	1	163	60	19	0	1	4	4	4	4	6	1	2	3	3	3	1	1	1	1	4	3	3	3	1	2	3	2	3	2	2	3	3	2	3	3	2	3	3	3	3	3	1	2	2	2	2	2	2
10527	2	163	48	19	1	1	4	4	4	4	6	3	2	2	3	1	1	1	1	1	3	2	2	2	2	2	2	2	2	2	2	2	2	2	2	2	2	2	2	2	2	2	2	2	2	2	2	2	2
7641	2	160	47	19	1	0	4	4	4	4	6	3	2	2	3	2	3	3	2	1	5	2	3	3	1	2	3	3	3	2	2	2	3	2	2	3	1	3	2	3	3	2	2	2	2	2	2	3	2
9229	1	175	67	19	0	0	3	3	3	3	10	3	3	3	3	2	1	3	1	1	2	2	2	3	2	1	2	2	2	3	2	2	3	2	3	2	1	2	3	3	2	2	1	2	2	2	2	2	1
10817	1	182	60	19	0	0	3	3	3	3	10	2	2	3	2	2	1	1	1	1	3	3	3	3	1	1	2	2	3	2	2	2	3	2	3	3	1	3	2	3	3	3	3	2	3	3	3	3	3
11077	2	168	60	19	1	1	4	5	5	4	4	2	2	2	2	1	1	4	2	1	4	3	2	1	1	2	1	2	3	1	1	2	3	1	2	2	1	3	2	2	1	1	3	1	2	1	1	2	2
8566	1	175	74	19	0	1	3	3	4	4	8	3	2	3	2	2	2	2	2	1	5	1	2	3	3	1	2	2	2	2	2	2	2	2	2	2	1	2	3	2	2	3	2	2	2	3	2	2	1
9866	1	186	95	19	1	1	4	5	4	4	5	2	1	1	2	1	1	1	1	1	1	2	2	2	2	2	2	2	2	2	2	2	3	2	2	2	1	2	2	2	2	2	2	2	2	2	2	2	2
7785	1	174	52	19	1	1	5	2	4	2	8	5	3	1	3	4	4	4	3	1	3	2	2	3	2	1	3	2	2	1	3	3	2	3	3	2	1	3	3	2	3	3	2	3	3	3	3	3	2
7455	1	170	80	19	1	1	5	4	5	1	6	5	4	5	3	1	1	1	1	1	1	1	3	3	3	1	3	1	3	1	3	3	3	1	3	3	1	1	3	1	3	3	1	3	1	3	3	3	3
9876	1	174	70	19	1	1	5	2	4	3	7	1	1	1	1	1	1	1	1	1	1	3	3	3	1	3	3	3	3	1	3	3	1	3	3	3	3	1	3	3	3	3	3	3	3	3	3	3	3
9056	2	156	47.5	19	1	1	5	3	4	2	7	2	2	2	2	2	2	2	2	1	5	2	2	2	2	2	2	2	2	2	2	2	2	2	2	2	2	2	2	2	2	2	2	2	2	2	2	2	2
7729	2	160	48	19	1	1	5	3	5	3	5	3	3	1	3	1	3	3	3	3	1	2	2	2	2	2	2	2	2	2	2	2	2	2	2	2	2	2	2	2	2	2	2	2	2	2	2	2	2
10586	1	187	79	19	1	1	4	2	4	2	9	3	3	5	3	2	2	2	2	2	1	1	1	1	3	2	2	2	2	1	3	3	1	2	2	2	2	2	2	2	2	2	2	2	2	2	2	2	2
11606	1	178	65	19	0	1	4	2	4	2	9	3	3	3	3	2	1	1	1	1	3	3	3	3	1	3	3	2	2	3	3	3	2	3	2	2	1	2	2	2	2	3	3	3	3	2	3	3	3
7007	2	168	65	19	0	1	4	1	5	4	7	2	1	1	2	1	1	1	1	1	3	2	2	2	2	2	2	2	2	2	2	2	2	2	2	2	2	2	2	2	2	2	2	2	2	2	2	2	2
7823	1	174	60	19	1	1	4	3	4	1	9	5	5	4	3	3	3	3	3	3	5	2	2	2	2	2	2	2	2	2	2	2	2	2	2	2	2	2	2	2	2	2	2	2	2	2	2	2	2
9821	1	185	60	19	1	0	4	2	5	3	7	5	2	2	2	1	1	1	1	1	5	2	3	3	2	2	3	3	3	3	2	2	2	2	3	1	1	3	2	2	2	2	2	2	2	2	2	2	2
6995	2	170	82	19	1	1	5	3	4	3	6	5	2	5	3	3	2	3	1	1	5	2	2	2	2	2	2	2	2	2	2	2	2	2	2	2	2	2	2	2	2	2	2	2	2	2	2	2	2
9139	2	165	62	19	1	1	5	3	4	3	6	2	2	1	3	1	1	1	1	1	1	2	2	2	2	2	2	2	2	2	2	2	2	1	2	1	1	3	2	1	2	2	2	2	2	2	2	2	1
8053	2	164.6	60.55	19	1	1	5	3	4	3	6	3	3	4	3	3	2	2	2	1	5	3	3	3	1	3	3	3	3	2	2	2	2	2	2	2	2	2	2	2	2	2	2	2	2	2	2	2	2
9408	2	170	55	19	1	0	5	3	4	3	6	5	2	4	3	3	4	5	2	1	3	2	3	3	1	1	3	2	3	1	3	3	2	3	3	3	1	3	2	3	3	3	1	3	3	3	3	3	3
10088	2	173	72	19	1	1	5	2	5	5	4	1	1	3	2	2	2	2	2	1	3	2	2	1	3	1	2	2	2	1	2	2	2	1	2	2	1	3	2	1	2	2	1	1	1	3	2	2	2
9753	1	178	70	19	1	1	5	4	4	2	6	5	5	4	4	5	5	4	5	1	3	3	3	2	1	3	3	2	3	1	2	3	2	3	3	2	3	3	2	3	2	2	2	3	3	3	3	3	2
9950	1	180	70	19	1	1	4	2	3	2	10	3	2	2	3	2	1	5	1	1	5	2	2	2	2	2	2	2	2	2	2	1	3	2	2	2	2	2	2	2	2	2	2	2	2	2	2	2	2
7218	1	178	84	19	0	0	4	4	5	1	7	2	2	2	2	1	1	1	1	1	2	3	3	3	2	3	3	3	3	2	3	3	2	2	3	2	1	2	3	2	3	3	1	2	3	3	2	3	3
7917	2	165	110	19	0	0	5	3	2	2	9	3	1	1	2	3	3	2	3	4	3	2	3	3	1	3	3	2	2	2	2	2	3	3	3	3	3	3	3	2	2	3	1	3	3	3	3	3	3
8108	2	170	50	19	1	0	5	2	3	4	7	3	3	2	2	1	1	1	1	1	3	3	2	2	1	2	2	2	3	2	2	2	1	2	1	1	1	3	2	2	3	3	1	2	2	2	2	2	1
9215	1	189	125	19	1	1	4	2	4	3	8	2	1	2	2	1	1	1	1	1	1	2	2	2	2	2	2	2	2	2	2	2	2	2	2	2	1	3	2	1	2	2	2	2	2	2	2	2	2
8181	2	168	60	19	1	1	4	2	4	3	8	3	2	3	2	1	1	1	1	1	1	1	2	2	3	2	1	3	3	2	3	2	2	1	1	1	1	3	2	1	2	3	1	2	3	3	3	3	1
8917	1	179	78	19	1	0	4	2	4	3	8	5	3	3	2	4	1	3	1	1	3	2	2	2	2	2	2	2	2	2	2	2	3	2	2	2	2	2	2	2	2	2	2	2	2	2	2	2	2
7468	2	165	49	19	1	0	5	4	3	2	7	2	2	2	2	1	1	1	2	1	2	2	3	3	3	2	3	2	2	2	3	3	3	1	2	1	1	3	2	2	2	3	2	3	3	3	3	3	2
8629	1	177	68.6	19	1	1	4	2	5	4	6	3	2	2	3	3	1	1	1	1	2	1	3	3	3	1	3	3	3	2	3	3	2	1	1	1	1	3	3	3	2	2	2	2	3	2	3	3	3
10394	1	162	62	19	0	1	4	2	5	4	6	2	2	3	2	1	1	2	2	1	1	3	3	3	3	2	2	2	2	2	2	2	2	2	1	2	1	3	2	1	1	2	1	2	3	2	2	3	3
8399	2	158	135	19	1	0	4	2	5	4	6	3	3	2	3	4	1	1	1	1	2	2	3	3	2	1	3	2	2	3	3	3	2	3	3	3	1	3	3	3	3	2	3	3	3	3	3	3	2
10299	1	171	58	19	1	1	5	5	3	1	7	5	3	5	2	2	3	2	1	1	3	2	2	2	2	2	2	2	2	2	2	2	2	2	2	2	2	2	2	2	2	2	2	2	2	2	2	2	2
7325	1	178	75	19	1	1	5	4	4	3	5	2	3	4	4	2	3	3	3	3	2	1	2	2	2	1	2	2	3	2	2	2	2	2	2	2	2	3	2	2	2	3	2	2	2	1	2	1	2
10028	1	175	75	19	0	0	3	2	4	2	10	2	3	2	2	5	5	5	5	2	5	2	3	1	1	2	1	1	2	1	1	1	2	2	1	2	2	3	1	1	1	2	1	1	1	1	2	1	1
11197	2	168	58	19	1	1	4	2	4	4	7	4	2	4	3	1	1	1	4	1	2	2	2	2	2	2	3	3	3	2	2	2	3	2	3	1	1	3	2	2	2	2	1	2	2	2	2	2	2
9811	1	173	52	19	1	1	4	2	4	4	7	2	3	3	2	1	1	1	1	1	5	2	2	2	2	1	2	2	2	2	2	2	2	2	1	2	1	3	2	2	1	2	1	1	2	2	2	2	3
8675	1	175	80	19	0	1	4	3	4	3	7	2	2	2	3	3	3	3	3	3	3	2	2	2	2	2	2	2	2	2	2	2	2	2	2	2	2	2	2	2	2	2	2	2	2	2	2	2	2
8351	1	173	80	19	1	1	4	3	4	3	7	3	2	2	3	1	1	1	1	1	1	3	3	3	1	2	3	2	3	1	2	3	2	2	3	3	2	3	3	3	3	3	1	1	3	3	3	2	2
9650	1	178	73	19	1	1	4	3	4	3	7	2	1	2	2	1	1	1	1	1	2	3	3	3	3	3	3	3	3	2	3	3	3	1	1	2	1	3	2	2	3	3	1	3	2	3	3	3	1
8231	2	174.5	68	19	1	1	4	3	4	3	7	3	2	3	2	1	1	1	1	1	2	2	3	3	2	2	2	3	3	2	3	3	3	1	1	1	1	3	2	1	2	2	2	2	3	3	3	3	3
8649	2	170	59	19	1	1	4	3	4	3	7	3	3	3	3	1	1	2	1	1	3	2	2	3	2	2	3	2	2	2	3	3	2	2	3	3	2	3	3	2	2	3	2	3	3	3	2	3	3
11938	2	163	51.5	19	1	1	4	3	4	3	7	2	1	2	2	1	1	1	1	1	5	3	3	3	2	2	2	3	3	3	3	3	3	1	1	2	1	3	2	1	2	2	3	2	2	3	3	3	2
7486	1	178	70	19	0	0	4	3	4	3	7	2	4	2	2	4	2	4	1	3	1	3	2	3	3	3	3	3	3	2	3	3	3	3	3	3	3	2	3	2	3	2	1	2	3	3	2	1	2
8710	1	180	65	19	1	0	4	3	4	3	7	1	1	1	2	2	2	2	2	1	2	2	2	2	2	2	2	2	2	2	2	2	2	2	2	2	2	2	2	2	2	2	2	2	2	2	2	2	2
9732	2	171	56	19	1	0	4	3	4	3	7	3	1	2	2	2	2	2	2	1	3	2	3	3	1	3	3	3	3	2	3	3	3	3	2	3	2	2	2	2	3	3	3	3	3	2	3	3	2
8285	2	164	47	19	1	1	5	4	3	3	6	4	3	3	2	3	3	1	1	1	1	2	2	2	2	2	2	2	2	2	2	2	2	2	2	2	2	2	2	2	2	2	2	2	2	2	2	2	2
9522	1	175	60	19	1	1	5	5	6	4	1	1	1	1	1	5	5	5	5	5	1	3	3	3	1	3	3	3	3	1	3	3	1	3	3	3	3	1	3	3	3	3	3	3	3	3	3	3	3
9585	2	155	54	19	0	0	4	3	5	4	5	3	2	4	3	1	3	1	1	1	3	3	3	3	1	3	3	3	3	2	3	3	2	2	1	3	1	3	3	2	2	3	3	2	3	3	2	3	2
8096	1	180	160	19	1	1	5	4	4	4	4	2	1	2	2	2	2	2	1	1	1	2	3	3	1	3	3	3	3	3	3	3	3	2	3	2	1	3	2	2	3	3	1	3	3	2	3	3	3
8276	2	155	50	19	0	0	5	4	4	4	4	4	2	3	2	2	1	1	1	1	1	2	3	3	1	3	3	2	3	2	3	3	2	2	2	2	2	3	2	1	2	3	2	2	2	2	3	3	3
10992	2	167	54	19	1	1	4	3	3	3	8	2	1	3	3	1	1	1	1	1	5	2	3	3	1	1	3	2	2	1	3	3	2	3	3	3	2	3	3	3	3	1	1	3	3	3	1	3	3
8862	2	174	64	19	0	0	4	3	3	3	8	2	2	2	2	1	1	1	1	1	3	2	2	3	2	2	2	2	2	2	2	2	3	2	2	2	2	2	2	2	2	2	2	2	2	2	2	2	2
7671	2	163	50	19	1	0	4	3	3	3	8	2	4	4	2	2	1	1	1	1	3	3	3	3	1	1	3	3	3	2	3	3	3	2	1	2	1	3	2	2	3	2	3	2	3	3	2	2	2
10006	1	192	100	19	1	1	4	3	4	4	6	3	3	1	2	1	1	1	1	1	1	2	2	2	2	2	2	2	2	2	2	2	2	2	2	2	2	2	2	2	2	2	2	2	2	2	2	2	2
8904	2	164	49	19	1	0	4	3	4	4	6	3	1	3	2	1	1	2	1	1	5	2	3	3	2	2	3	3	3	3	3	3	2	3	3	3	1	3	3	3	3	3	3	3	3	3	3	3	2
11116	2	168	70	19	1	1	3	3	5	3	7	3	2	3	3	2	3	1	2	1	4	2	2	2	2	2	2	2	3	1	2	2	1	2	1	3	3	3	2	3	3	3	1	1	1	2	2	2	2
8234	2	158	46	19	1	1	4	4	5	4	4	5	3	3	3	3	3	3	1	1	3	2	2	2	2	2	2	2	2	2	2	2	2	2	2	2	1	2	2	2	2	2	1	2	2	2	2	2	2
9672	1	180	80	19	0	1	3	3	4	3	8	2	4	1	3	1	1	1	1	1	1	2	2	2	2	2	2	3	2	2	2	2	2	1	1	1	1	2	1	2	2	2	2	1	1	3	3	3	3
8636	1	180	60	19	1	1	4	4	4	4	5	2	1	2	2	1	1	1	1	1	2	2	2	2	2	2	3	3	3	3	3	3	2	3	3	3	1	2	3	2	2	2	2	3	3	2	3	3	2
9696	1	180	60	19	1	1	4	4	4	4	5	3	3	3	3	2	3	2	2	2	2	2	2	2	2	2	2	2	2	2	2	2	2	2	2	2	2	2	2	2	2	2	2	2	2	2	2	2	2
8306	2	169	52	19	1	1	4	4	4	4	5	2	2	2	2	3	2	3	1	1	3	2	3	3	2	2	3	2	3	2	3	3	2	2	3	2	1	2	2	2	2	2	1	3	3	3	3	3	3
9356	2	158	48	19	1	1	4	4	4	4	5	3	2	2	3	1	2	1	1	1	2	3	3	3	1	2	3	1	1	1	3	3	3	2	3	3	1	2	3	3	3	3	3	3	3	3	1	2	3
7444	2	174	57	19	1	0	4	4	4	4	5	2	1	1	2	1	1	1	1	1	1	2	2	2	2	2	2	2	2	2	2	2	3	1	2	2	1	3	2	1	2	2	2	2	2	2	2	2	2
4261	1	178	61	19	0	1	4	4	3	4	6	3	3	3	2	4	4	4	1	4	2	2	3	3	3	3	3	1	1	1	3	2	2	2	2	2	2	1	3	3	3	2	2	2	2	3	3	3	2
8263	2	162	55	19	1	1	5	2	5	2	6	3	2	2	3	1	1	1	1	1	5	2	2	2	2	2	2	2	2	2	2	2	3	2	2	2	1	2	2	2	2	2	1	2	2	2	2	2	2
9859	2	161	50	19	1	1	5	2	5	2	6	2	2	3	2	2	1	1	1	1	5	2	2	2	2	2	2	2	2	3	3	2	2	2	2	1	1	3	2	1	2	3	1	2	2	2	2	2	2
11444	2	170	70	19	1	1	5	2	4	2	7	3	2	3	2	2	1	1	1	1	5	2	2	3	1	1	2	2	3	3	2	3	3	3	3	2	1	3	2	1	2	2	2	3	3	2	2	3	2
7969	2	155	60	19	1	1	5	3	4	1	7	3	2	3	3	1	1	1	1	1	5	2	3	3	2	2	3	2	3	2	2	2	2	2	3	3	1	3	2	3	2	3	3	3	2	2	2	3	2
7681	2	165	70	19	1	0	5	3	4	1	7	3	4	3	2	1	1	1	1	1	3	2	2	2	2	2	2	2	2	2	2	2	2	2	2	2	2	2	2	2	2	2	2	2	2	2	2	2	2
7838	2	166	47	19	1	1	5	3	5	2	5	3	4	3	2	2	1	1	1	1	5	2	2	2	2	2	3	2	3	3	3	3	3	2	2	2	1	2	2	2	2	3	2	2	2	3	2	2	2
8323	2	167	55	19	1	1	4	2	5	2	7	3	2	3	3	1	1	1	1	1	5	3	3	2	2	2	3	3	3	2	3	3	3	2	1	3	1	2	2	2	1	3	1	3	3	2	3	3	2
7560	2	158	45	19	1	1	4	1	3	2	10	1	1	3	2	1	1	1	1	1	4	2	2	2	2	2	2	2	2	2	2	2	3	2	2	2	1	3	3	2	2	2	1	1	3	3	3	3	2
11557	1	170	110	19	1	1	5	3	5	3	4	2	4	3	2	1	1	1	1	1	1	1	3	3	3	3	3	3	3	1	3	3	3	3	3	3	1	3	3	1	3	3	3	3	3	3	3	3	3
9683	2	170	80	19	1	1	5	3	5	3	4	4	3	3	3	2	1	2	2	1	2	3	3	3	2	2	3	3	2	2	3	3	3	3	3	3	2	2	3	3	3	2	2	3	3	2	2	3	3
3816	2	164	60	19	1	0	5	3	5	3	4	2	1	3	2	3	3	3	3	3	3	2	2	2	2	2	2	2	2	2	2	2	2	2	2	2	2	2	2	2	2	2	2	2	2	2	2	2	2
7573	1	177	79	19	1	1	4	2	4	2	8	2	1	1	2	1	1	1	1	1	1	2	2	3	2	2	2	2	2	2	3	3	1	2	2	2	1	2	2	1	2	2	1	1	2	2	2	2	2
7013	2	167	62	19	1	1	4	2	4	2	8	2	1	2	2	1	1	1	1	1	5	3	3	3	1	3	3	3	3	1	3	2	2	2	2	3	3	2	2	3	2	2	2	2	1	3	3	3	3
7718	1	178	60	19	0	1	4	2	4	2	8	2	1	1	2	1	1	1	1	1	1	2	3	3	2	1	3	3	2	3	3	3	3	2	3	3	1	3	3	1	2	3	2	3	3	3	2	3	2
9596	2	172	56	19	0	1	4	2	4	2	8	2	2	2	2	2	1	2	1	1	1	2	2	2	2	2	2	2	2	2	2	2	2	2	2	2	1	2	2	2	2	2	2	2	2	2	2	2	2
10099	2	175	53	19	1	1	4	2	4	2	8	2	1	4	2	1	2	1	1	1	5	3	3	3	1	3	2	3	2	2	2	2	2	2	3	3	2	2	2	1	2	2	2	2	2	3	3	3	3
7362	2	165	52	19	0	1	4	2	4	2	8	2	2	2	2	2	1	1	1	1	5	2	2	3	2	2	3	3	3	2	3	3	3	1	1	2	1	2	3	2	2	3	2	3	3	2	3	3	1
7744	2	171	75	19	1	0	4	2	4	2	8	3	2	2	2	1	1	3	1	1	2	2	2	2	2	1	3	3	3	2	2	2	2	2	1	2	1	3	2	1	2	2	1	1	2	3	3	2	2
9993	1	187	65	19	1	0	4	2	4	2	8	2	2	2	2	2	2	2	2	2	5	2	2	2	2	2	2	2	2	2	2	2	2	2	2	2	2	2	2	2	2	2	2	2	2	2	2	2	2
8610	2	163	48	19	1	0	4	2	4	2	8	5	4	4	3	3	3	3	4	1	3	2	2	2	2	2	2	2	2	2	2	2	3	2	2	2	1	3	2	2	2	2	1	2	2	2	2	2	2
10109	2	165	64	19	1	1	4	1	5	4	6	2	1	1	2	1	1	1	1	1	1	1	3	3	1	3	3	3	3	2	3	3	3	3	3	2	1	3	3	3	3	3	3	3	3	3	3	3	3
8183	1	184	81	19	1	1	5	5	5	1	4	2	1	1	2	1	1	1	1	1	1	2	2	2	2	1	2	2	2	2	2	2	2	2	2	2	2	2	2	2	2	2	2	2	2	2	2	2	2
7849	2	160	55	19	1	0	4	3	4	1	8	3	3	3	3	3	3	3	3	3	3	2	2	2	2	2	2	2	2	2	2	2	2	2	2	2	2	2	2	2	2	2	2	2	2	2	2	2	2
7423	2	161	53	19	1	0	4	3	4	1	8	1	1	1	2	1	1	1	1	1	3	3	3	3	1	3	3	3	3	1	3	3	3	3	3	3	1	3	3	3	3	3	1	1	3	3	3	3	3
6956	2	171	60	19	1	1	4	2	5	3	6	3	2	3	2	2	2	1	1	1	1	2	2	2	2	2	2	2	2	2	2	2	2	2	2	2	1	2	2	2	2	2	2	2	2	2	2	2	2
7394	2	160	60	19	1	1	4	2	5	3	6	4	3	1	3	3	3	3	3	3	4	2	2	2	2	2	2	2	2	2	2	2	2	2	2	2	2	2	2	2	2	3	3	3	3	2	2	2	2
10368	2	173.6	66	19	1	1	5	3	4	3	5	3	2	2	3	2	2	2	2	1	2	2	3	3	2	2	3	3	3	2	3	3	2	3	3	1	1	3	3	2	3	2	1	3	3	2	3	3	3
7667	2	162	55	19	0	1	5	4	4	2	5	5	4	5	3	1	1	2	2	2	5	2	2	2	3	2	2	2	2	2	2	2	2	2	2	2	2	3	2	2	2	2	1	1	2	2	2	2	2
8640	2	159	41	19	0	0	4	2	3	2	9	3	2	3	2	5	2	2	4	1	3	3	2	2	3	2	3	2	2	2	2	3	3	2	2	1	1	3	1	1	2	2	2	2	2	3	2	2	3
6861	2	168	61.7	19	1	1	4	2	4	3	7	2	2	2	2	1	1	1	1	1	4	3	3	3	1	2	3	3	3	1	3	3	1	3	3	3	3	2	3	3	3	3	2	3	3	3	3	3	3
9646	1	181	65	19	1	0	4	2	4	3	7	3	2	1	3	1	1	1	1	1	1	2	3	3	2	2	3	3	3	3	3	3	3	2	2	2	1	3	2	2	2	2	2	2	2	2	2	3	1
12163	1	175	60	19	1	1	5	3	3	3	6	2	4	1	2	2	2	2	2	2	1	1	2	1	2	2	2	2	2	2	2	3	3	2	2	2	2	2	2	2	3	3	2	2	3	2	2	2	1
8098	1	175	65	19	1	1	4	3	4	2	7	3	2	3	3	1	1	1	1	1	3	2	2	2	2	1	2	2	2	2	2	2	3	2	2	2	2	2	2	2	2	2	2	2	2	2	2	2	2
8070	1	172	62	19	1	1	4	3	4	2	7	2	2	2	2	1	1	1	2	1	1	1	2	2	2	1	2	2	2	3	2	2	3	1	2	2	1	3	2	2	2	3	1	2	2	2	2	2	1
10135	2	170	64	19	1	0	4	3	5	3	5	3	2	3	2	3	1	1	1	1	5	3	3	3	1	2	3	2	2	2	3	3	2	1	2	2	1	3	2	3	3	3	1	2	2	3	3	3	2
10130	1	176	55	19	1	0	4	2	3	3	8	3	3	4	1	2	1	1	1	1	3	3	2	3	1	1	3	2	3	2	2	2	2	2	2	2	2	2	2	3	3	2	1	2	2	2	2	2	1
10595	1	183	73	19	0	1	3	2	4	2	9	2	1	2	2	1	1	1	1	1	2	2	2	2	2	2	2	3	3	2	2	2	3	2	2	1	1	2	2	1	2	3	2	2	2	2	2	2	2
8673	2	165	56	19	0	0	4	2	4	4	6	2	1	3	2	2	2	2	3	1	1	2	2	2	2	2	2	2	2	2	2	2	3	2	1	2	1	2	2	2	2	2	1	2	2	2	1	2	1
9342	2	160	70	19	1	1	3	2	5	3	7	1	2	3	3	5	2	1	1	1	1	2	3	3	2	1	3	2	2	3	2	2	3	1	3	3	1	3	3	2	3	2	2	1	2	2	1	2	2
9099	1	170	58	19	1	1	4	3	4	3	6	4	2	3	2	1	1	4	1	1	1	2	2	2	2	2	2	2	2	2	2	2	2	2	2	2	2	2	2	2	2	2	2	2	2	2	2	2	2
8143	2	164	61	19	1	0	4	3	4	3	6	1	1	4	2	1	1	1	1	1	2	3	3	3	1	2	3	2	2	2	3	3	3	3	2	2	1	2	3	2	2	3	1	2	3	3	2	2	1
8909	2	164	52	19	1	0	4	3	4	3	6	2	2	2	2	1	1	1	1	1	1	2	3	3	2	3	3	3	3	2	2	3	3	1	1	1	1	2	2	1	2	3	2	2	3	2	3	3	2
8597	1	181	70	19	0	1	3	2	3	2	10	1	1	4	4	4	2	2	3	2	1	1	2	2	3	2	1	1	2	3	2	3	2	1	2	3	2	3	2	3	2	1	1	2	3	3	2	1	1
10682	1	192	75	19	1	1	4	3	5	4	4	2	3	4	3	3	1	4	1	1	3	3	2	2	1	3	2	1	3	1	1	2	2	1	1	1	1	3	2	3	2	3	1	1	1	3	1	2	1
7264	1	184	85	19	0	0	5	4	4	4	3	4	2	2	3	1	1	5	1	1	3	3	3	3	3	1	3	3	2	1	3	3	2	1	1	2	1	1	3	1	3	3	1	3	3	3	3	3	3
10149	1	172	60	19	1	0	5	4	4	4	3	2	1	2	2	2	2	2	2	2	1	2	2	2	2	2	2	2	2	2	2	2	2	2	2	2	2	2	2	2	2	2	2	2	2	2	2	2	2
10722	1	172	65	19	0	1	4	3	3	3	7	4	2	1	3	1	1	1	1	1	1	2	2	2	2	1	3	2	3	2	2	2	1	2	2	2	2	2	2	2	2	2	2	2	2	2	2	2	2
9787	2	167	60	19	1	1	4	3	3	3	7	3	2	3	2	3	3	3	1	1	1	2	2	2	2	2	2	2	2	2	2	2	2	2	2	2	2	2	2	2	2	2	2	2	2	2	2	2	2
7706	2	158	47	19	1	0	4	3	3	3	7	2	1	1	2	2	1	1	1	1	1	2	3	3	2	2	3	3	3	2	2	2	2	2	2	2	2	2	2	2	2	3	2	3	3	2	2	2	2
8461	2	162	55	19	1	1	3	3	4	2	8	3	3	5	2	2	2	2	2	2	5	2	2	2	2	2	2	2	2	2	2	2	2	2	2	2	2	2	2	2	2	1	1	2	2	3	2	2	3
10330	1	181	82	19	1	1	4	4	3	2	7	2	1	2	2	1	1	2	1	1	3	3	3	3	1	2	3	2	3	2	3	3	3	3	1	2	1	3	1	2	3	3	1	2	3	2	2	2	1
9548	1	180	66	19	1	1	5	5	5	4	1	1	1	1	1	5	1	5	5	5	1	3	3	1	2	2	2	2	2	2	2	2	2	2	2	2	2	2	2	2	2	2	2	2	2	2	2	2	2
7410	1	172	65	19	0	0	4	3	2	3	8	2	3	2	2	1	1	2	1	1	1	2	2	2	2	2	2	2	2	2	2	1	3	1	1	1	3	3	3	2	2	2	2	2	2	2	2	2	1
9045	1	172	150	19	1	0	4	3	5	5	3	3	3	3	3	3	3	3	3	3	2	2	2	2	2	2	2	2	2	2	2	2	2	2	2	2	2	2	2	2	2	2	2	2	2	2	2	2	2
7604	1	178	63	19	1	1	3	3	4	3	7	1	1	1	1	3	3	3	3	3	1	2	2	2	2	2	2	2	2	2	2	2	2	2	2	2	2	2	2	2	2	2	2	2	2	2	2	2	2
10767	2	167	54	19	1	1	3	3	4	3	7	3	2	3	3	1	1	1	1	1	1	2	2	2	2	2	2	2	2	2	2	2	2	2	2	2	2	2	2	2	2	2	2	2	2	2	2	2	2
10166	2	158	47	19	0	0	3	3	4	3	7	2	2	3	2	2	3	3	1	1	5	2	2	2	3	1	2	2	2	2	3	2	3	1	2	2	1	2	2	3	2	3	2	2	3	2	2	2	2
10173	2	160	46	19	0	0	4	4	4	4	4	3	2	3	2	1	1	2	1	1	3	2	2	3	1	3	3	2	2	2	2	2	2	2	2	2	1	2	2	2	2	2	1	1	2	2	1	2	2
7760	2	160	45	19	1	1	3	3	3	3	8	2	4	2	2	1	1	1	1	1	3	2	2	2	2	1	2	2	2	2	2	2	2	1	2	2	1	3	2	2	2	2	2	2	2	2	2	2	1
9855	1	188	88	19	1	1	5	5	2	4	4	3	4	1	2	4	3	4	5	4	3	2	3	3	3	2	1	3	2	2	3	1	1	3	1	2	3	2	2	2	2	2	1	3	2	2	1	2	2
10310	2	160	65	19	1	0	3	4	3	3	7	2	2	2	2	1	1	1	1	1	1	2	2	2	2	2	2	2	2	2	2	2	2	2	2	2	2	2	2	2	2	2	2	2	2	2	2	2	2
9112	2	163	51	19	1	1	2	3	5	4	6	4	2	2	3	3	4	5	3	1	3	1	3	2	1	3	3	2	3	1	3	2	2	2	1	2	2	2	3	2	2	2	1	2	2	3	2	2	3
9920	1	186	75	19	0	0	4	5	4	5	2	3	1	1	1	2	2	2	2	2	1	2	2	2	2	2	2	2	2	2	2	2	2	2	2	2	2	2	2	2	2	2	2	2	2	2	2	2	2
9959	2	160	52	19	1	0	3	4	3	4	6	2	2	4	2	2	2	2	2	2	5	3	3	3	2	3	3	3	3	1	3	3	2	1	2	2	1	3	2	2	2	2	2	2	2	2	3	3	3
10079	2	165	67	19	1	1	5	1	4	1	8	2	2	2	2	1	1	1	1	1	2	3	3	2	2	2	2	2	2	3	3	2	3	1	2	1	1	3	2	2	2	3	2	2	3	2	2	3	2
10243	2	163	48	19	1	0	5	1	5	3	5	2	2	1	2	1	2	1	2	1	3	2	3	3	2	2	3	2	3	2	2	3	3	2	2	2	1	3	2	3	2	2	2	2	3	2	2	3	2
8868	2	172	70	19	1	1	5	2	4	2	6	2	2	1	2	1	1	1	1	1	2	3	3	3	2	2	2	2	3	3	3	3	3	1	2	2	2	3	3	1	1	2	1	3	3	3	3	3	3
9257	1	177	66	19	1	1	5	2	4	2	6	2	1	1	2	1	1	3	1	1	3	2	2	2	2	2	2	2	2	2	2	2	2	2	2	2	2	2	2	2	2	2	2	2	2	2	2	2	2
10412	2	165	49	19	1	1	5	3	4	1	6	4	3	3	2	1	1	3	1	1	5	2	3	3	2	3	1	3	3	3	3	3	2	3	1	1	1	3	1	1	1	3	1	3	2	3	3	3	3
7651	1	185	108.5	19	1	1	5	4	5	1	4	3	1	1	2	1	1	1	3	1	5	2	2	2	2	2	2	2	2	2	2	2	2	2	2	2	2	2	2	2	2	2	2	2	2	3	3	3	3
8036	2	168	47	19	0	1	4	2	4	1	8	4	5	5	3	3	3	5	3	1	3	2	2	2	2	1	1	2	3	2	2	3	3	2	1	2	1	3	2	2	2	2	1	2	3	3	3	2	1
7932	1	173	93	19	1	0	5	3	3	1	7	2	2	1	2	1	3	2	1	1	1	1	2	1	2	2	2	1	2	3	2	1	2	1	2	1	1	3	1	1	1	2	1	1	2	2	2	3	3
10140	2	163	55	19	0	1	4	1	5	3	6	4	3	4	3	1	1	1	1	1	3	3	2	3	1	1	2	2	2	2	3	2	3	2	2	2	1	3	2	3	2	2	1	1	2	2	2	2	2
9262	1	175	74	19	1	1	5	3	4	2	5	2	1	1	2	2	1	1	1	1	5	2	3	3	2	1	3	2	2	2	3	3	3	2	1	3	1	3	2	2	3	2	3	2	3	3	2	2	1
7600	2	165	53	19	1	1	5	3	4	2	5	3	4	3	2	2	1	3	1	1	1	1	2	3	1	2	2	2	2	2	2	2	3	1	3	2	1	2	3	2	3	3	3	3	3	3	3	3	2
6868	1	172	105	19	0	1	4	2	4	2	7	2	1	1	2	1	1	1	1	1	1	1	3	3	2	1	3	3	3	2	3	3	2	3	2	3	3	1	3	3	3	3	2	3	3	3	3	3	3
10727	2	158	100	19	1	1	4	2	4	2	7	2	2	4	1	2	2	2	3	1	2	2	1	3	1	1	3	2	2	1	3	3	1	3	3	3	1	2	3	3	3	2	2	3	3	3	2	3	3
10300	1	178	90	19	1	1	4	2	4	2	7	1	1	5	5	1	1	1	1	1	5	3	3	3	1	3	3	3	3	1	3	3	1	3	3	3	3	1	3	3	3	3	3	3	3	3	3	3	3
9010	1	182	70	19	1	1	4	2	4	2	7	2	2	2	1	1	1	1	1	1	1	1	3	3	3	1	3	3	3	1	3	3	3	3	3	3	1	3	1	1	1	1	1	1	3	3	1	3	1
7980	2	164	60	19	1	1	4	2	4	2	7	2	2	3	2	2	1	1	1	1	2	3	3	3	3	1	3	2	3	1	3	3	3	3	3	3	1	2	3	3	3	3	2	3	3	3	3	3	3
8092	2	161	52	19	0	1	4	2	4	2	7	3	2	1	2	2	1	1	1	1	5	2	2	2	2	1	3	3	3	2	2	2	2	2	1	2	1	2	2	2	2	2	2	2	2	2	2	2	2
7558	2	160	46	19	1	1	4	2	4	2	7	4	2	1	3	1	1	1	1	1	1	3	3	3	3	1	3	3	3	3	3	3	3	3	2	1	1	3	3	2	2	3	2	3	3	3	3	3	2
9709	2	163	45	19	0	1	4	2	4	2	7	3	3	3	3	2	2	2	2	2	2	2	2	2	2	3	3	3	3	1	3	3	1	3	3	3	3	1	3	3	3	3	3	3	3	3	3	3	3
9111	2	155	47	19	0	0	4	2	4	2	7	3	1	2	3	3	1	1	1	1	5	3	3	3	1	3	3	2	2	3	2	2	1	2	2	2	2	2	3	3	3	2	2	2	2	3	2	2	3
8469	2	168	65	19	1	0	4	3	4	1	7	4	4	2	2	3	3	3	3	3	3	2	2	2	2	2	2	2	2	2	2	2	3	2	1	1	1	2	2	2	2	2	2	2	2	2	2	2	2
8162	2	164	60	19	0	0	5	4	3	1	6	2	2	2	2	1	1	1	1	1	3	2	2	2	2	2	2	2	2	2	2	2	2	2	2	2	2	2	2	2	2	2	2	2	2	2	2	2	2
9701	2	167	46	19	0	0	4	2	3	2	8	1	1	1	2	1	1	1	1	1	1	1	3	2	2	2	2	2	2	2	3	2	3	2	3	2	1	3	2	2	2	3	2	2	2	2	2	2	2
10424	1	182	52	19	0	1	5	3	2	2	7	2	2	2	2	3	3	3	3	3	2	2	2	2	2	2	2	2	2	2	2	2	2	2	2	2	2	2	2	2	2	2	2	2	2	2	2	2	2
9284	2	165	73	19	1	1	4	2	4	3	6	3	3	3	2	3	1	1	1	1	5	2	2	2	3	3	3	2	3	2	3	2	2	3	2	2	3	1	2	3	3	2	3	3	3	2	2	2	2
7289	2	163	51	19	1	1	4	2	4	3	6	3	2	3	2	1	2	2	1	1	5	2	2	2	2	2	2	2	2	2	2	2	3	2	2	2	1	2	2	2	2	2	1	2	2	3	2	2	2
9445	2	156	50	19	1	1	4	2	4	3	6	2	2	1	2	1	1	1	1	1	3	2	2	2	2	2	2	2	2	2	2	2	2	2	2	2	2	2	2	2	2	2	2	2	2	2	2	2	2
11186	2	158	49	19	1	1	4	2	4	3	6	2	3	3	2	1	3	5	5	1	3	3	3	3	3	3	3	3	3	1	3	3	1	3	3	3	3	1	3	3	3	3	3	3	3	3	3	3	3
7219	2	160	46	19	1	1	4	2	4	3	6	2	1	2	2	1	1	1	1	1	3	2	3	3	2	3	3	2	2	2	3	3	2	2	3	3	1	3	3	3	3	3	1	2	3	3	2	3	1
7875	1	182	70	19	1	0	4	4	4	1	6	2	1	1	2	1	1	1	1	1	2	2	2	3	1	2	3	3	3	3	3	3	3	1	1	3	1	3	2	2	3	3	3	3	3	3	3	3	3
8060	1	170	58	19	1	1	4	3	5	3	4	2	1	1	2	1	1	1	1	1	2	1	1	1	3	1	1	1	1	3	1	1	3	1	1	1	1	3	1	1	1	1	1	1	1	1	1	1	1
7732	2	167	61	19	1	1	3	2	4	2	8	2	1	2	2	1	2	1	1	1	1	2	2	2	2	2	2	2	2	2	2	2	2	2	2	2	2	2	2	2	2	2	2	2	2	2	2	2	2
8948	2	162	52	19	0	0	3	2	4	2	8	2	2	2	2	1	1	1	2	1	2	3	2	3	1	1	3	2	1	2	2	3	3	3	3	3	2	3	3	1	3	3	2	1	3	3	3	3	2
6906	1	182	60	19	1	1	5	3	5	5	1	2	1	1	2	1	1	1	1	1	5	2	2	3	1	1	1	1	3	3	1	1	3	1	1	2	3	3	1	1	1	1	1	1	2	1	1	1	1
7859	2	165	55	19	0	0	4	3	3	2	7	3	2	2	2	3	3	3	3	3	1	2	2	2	2	2	2	2	2	2	2	2	2	2	2	2	2	2	2	2	2	2	2	2	2	2	2	2	2
7539	2	168	58	19	1	0	4	2	4	4	5	2	4	2	2	3	3	3	3	3	2	2	2	2	2	2	2	2	2	2	2	2	3	2	2	2	2	2	2	2	2	2	2	2	2	2	2	2	2
8026	2	160	55	19	1	0	4	4	3	1	7	2	2	3	2	2	1	1	1	1	2	2	2	2	2	2	2	2	2	2	2	2	3	1	1	1	1	3	1	1	1	2	1	1	2	2	2	2	1
9121	1	181	70	19	1	1	4	3	4	3	5	3	1	1	1	3	1	1	1	1	3	3	3	3	2	3	3	3	3	1	3	3	3	3	3	2	1	2	3	3	3	3	3	3	3	3	3	3	3
10106	2	160	60	19	0	0	4	3	4	3	5	2	1	1	2	3	3	3	3	3	1	2	2	2	2	2	2	2	2	2	2	2	2	2	2	2	2	2	2	2	2	2	2	2	2	2	2	2	2
9816	1	176	66	19	1	1	4	4	4	2	5	1	5	3	2	5	1	1	1	1	5	2	3	3	1	2	3	3	3	3	3	2	2	1	2	3	2	3	3	3	3	2	2	3	3	3	3	3	3
7142	1	174	64	19	0	1	3	2	3	2	9	2	2	3	2	1	1	1	1	1	1	2	2	2	2	2	2	2	2	2	2	2	2	2	2	2	2	2	2	2	2	2	2	2	2	2	2	2	2
9636	2	168	57	19	1	0	3	2	3	2	9	3	4	3	2	2	2	1	2	1	2	2	2	2	2	2	2	2	2	2	2	2	2	2	2	2	2	2	2	2	2	3	2	2	3	3	3	3	3
9090	2	172	65	19	1	1	5	5	3	2	4	2	3	1	3	2	1	1	1	1	2	2	3	3	2	2	2	3	3	1	3	3	1	3	3	3	3	1	3	3	3	3	3	3	3	3	3	3	3
8804	1	170	75	19	0	0	4	3	2	2	8	2	2	2	2	2	2	2	2	1	1	3	3	3	2	2	2	2	2	2	2	2	2	2	2	2	2	2	2	2	2	2	2	2	2	2	2	2	2
10117	1	185	85	19	1	1	4	5	4	1	5	4	3	4	3	1	1	1	1	1	2	2	3	3	3	3	3	2	2	2	3	3	2	3	3	2	2	2	2	1	1	1	1	3	3	2	3	3	1
8025	2	162	75	19	1	1	4	5	4	1	5	2	1	1	2	1	1	2	1	1	5	3	3	3	2	2	3	2	2	3	3	3	2	2	2	2	1	3	3	3	2	3	3	2	3	3	3	3	2
10568	2	150	40	19	1	1	4	4	2	1	8	2	1	2	2	1	1	1	1	1	5	2	2	3	2	2	1	2	2	2	3	3	3	2	2	2	2	3	2	3	2	2	2	3	3	3	3	2	1
7554	2	171	55	19	1	0	3	2	4	3	7	1	3	4	2	3	3	3	2	1	2	2	2	2	2	2	2	2	2	2	2	2	2	2	2	2	2	2	2	2	2	2	2	2	2	2	2	2	2
8389	2	165	55	19	1	1	3	2	5	4	5	3	1	2	2	1	1	2	1	1	1	3	3	3	2	1	3	3	3	2	3	3	3	2	3	3	1	3	3	2	2	3	3	3	3	3	3	3	3
7866	2	165	45	19	1	0	4	3	2	3	7	3	2	3	2	3	1	1	1	1	3	2	2	2	2	2	2	2	2	2	2	2	3	2	2	2	2	2	2	2	2	2	2	2	2	2	2	2	2
8346	1	175	60	19	0	1	3	4	3	2	7	2	1	2	2	1	1	1	1	1	1	3	3	3	3	1	3	3	2	3	3	3	3	1	1	1	1	3	3	2	1	3	2	2	3	2	3	3	2
5306	1	183	80	19	1	1	2	2	3	3	9	3	3	3	3	3	3	3	3	3	3	2	2	2	2	2	2	2	2	2	2	2	2	2	2	2	2	2	2	2	2	2	2	2	2	2	2	2	2
11083	2	158	45	19	1	0	3	3	2	3	8	2	2	1	2	1	1	1	1	1	1	2	3	3	1	3	3	3	3	3	3	3	3	1	3	1	1	3	2	1	3	3	3	3	3	3	3	3	2
9317	1	170	60	19	0	0	2	2	4	4	7	3	3	4	2	5	5	5	5	1	3	1	1	3	1	1	2	2	3	1	3	3	3	2	2	2	2	2	2	2	2	2	2	2	2	2	2	2	2
9904	1	190	67	19	1	0	2	3	4	3	7	2	2	2	2	2	2	2	2	2	2	2	2	2	2	2	2	2	2	2	2	2	2	2	2	2	2	2	2	2	2	2	2	2	2	2	2	2	2
8780	1	186	86	19	1	1	3	4	4	4	4	2	1	2	2	1	1	1	1	1	1	3	3	3	1	3	3	3	3	1	3	3	1	3	3	3	3	1	3	3	3	3	3	3	3	3	3	3	3
10095	2	165	62	19	1	1	3	3	2	4	7	2	2	3	2	1	1	1	1	1	5	3	3	3	2	2	3	3	2	3	3	3	3	2	3	2	1	2	3	2	2	3	2	2	3	3	3	3	3
8080	1	173	70	19	0	0	3	5	1	1	9	3	4	3	3	1	1	1	1	1	1	2	2	2	2	2	2	2	2	2	2	2	2	2	2	2	2	2	2	2	2	2	2	2	2	2	2	2	2
7095	2	160	47	19	1	0	2	3	3	3	8	2	4	1	2	1	1	1	1	1	1	2	2	2	2	2	2	2	3	3	3	2	3	2	2	2	1	3	2	2	2	2	2	2	2	3	2	2	2
9156	2	168	55	19	1	0	4	5	4	5	1	5	5	5	2	4	4	4	4	4	5	2	2	2	2	2	2	2	2	2	2	2	2	2	2	2	2	2	2	2	2	2	2	2	2	2	2	2	2
9270	1	174	60	19	1	1	3	4	3	4	5	3	3	2	2	1	1	1	2	1	1	3	3	3	1	1	3	3	2	3	3	3	2	1	1	1	1	3	3	3	1	3	1	3	3	3	1	3	3
7661	2	150	40	19	1	0	5	3	5	1	4	3	4	4	3	3	3	3	3	3	3	2	2	2	2	2	2	2	2	2	2	2	2	2	2	2	2	2	2	2	2	2	2	2	2	2	2	2	2
10101	1	176	65	19	0	0	4	1	4	1	8	2	2	2	2	1	1	1	1	1	1	1	1	1	3	1	1	1	1	3	1	1	3	1	1	1	1	3	1	1	1	1	1	1	1	1	1	1	1
12157	1	181	67	19	1	1	4	2	4	1	7	2	3	3	3	1	1	1	1	1	3	2	2	2	2	2	2	2	2	2	2	2	2	2	2	2	2	2	2	2	2	2	2	2	2	2	2	2	2
8957	2	165	60	19	1	1	4	2	4	1	7	3	2	2	2	2	2	2	2	1	5	2	2	3	2	2	3	2	2	2	2	2	1	3	3	3	2	2	2	2	2	2	1	3	2	3	2	2	2
8761	2	170	45	19	0	1	4	2	4	1	7	4	2	3	2	2	3	2	1	1	3	2	2	2	2	2	2	2	2	2	2	2	2	2	2	2	2	2	2	2	2	2	2	2	2	2	2	2	2
8107	2	155	48	19	1	1	5	3	3	1	6	2	4	1	2	1	1	1	1	1	1	2	3	3	3	2	3	3	3	3	3	3	3	1	3	2	1	2	3	3	3	3	2	3	3	3	3	3	3
11068	1	178	54	19	1	0	5	3	3	1	6	3	2	3	2	2	3	4	2	1	5	3	3	3	3	2	2	2	3	2	3	3	1	2	2	3	2	3	2	2	2	2	2	2	2	3	2	2	2
9887	2	168	50	19	1	0	5	4	4	1	4	3	3	3	3	3	3	3	3	3	1	2	2	2	2	2	2	2	2	2	2	2	2	2	2	2	2	2	2	2	2	2	2	2	2	2	2	2	2
10033	2	168	68	19	1	0	4	2	3	1	8	2	2	2	2	1	1	1	1	1	1	2	2	2	2	2	2	2	2	2	2	2	2	2	2	2	2	2	2	2	2	2	2	2	2	2	2	2	2
10515	2	155	41	19	1	0	5	2	3	3	5	3	3	3	3	1	2	1	4	1	2	3	3	3	2	2	3	2	2	2	3	3	2	2	3	3	2	2	3	2	3	2	2	3	3	2	2	3	3
11101	2	174	62	19	1	1	4	2	4	2	6	4	4	3	3	2	1	3	2	1	5	2	3	3	3	1	2	2	2	3	3	3	3	1	2	2	1	3	2	2	2	3	1	2	3	3	2	3	3
10072	1	164	62	19	1	1	4	3	4	1	6	3	3	1	3	2	1	1	2	1	5	2	2	2	2	3	3	3	3	2	3	2	3	2	1	2	1	3	2	2	3	3	2	3	3	3	3	2	2
10184	2	163	88	19	1	1	5	4	3	1	5	1	4	4	2	2	3	2	3	1	3	2	2	2	2	2	2	2	2	2	2	2	2	2	1	2	1	2	2	2	2	2	2	2	2	2	2	2	2
7914	2	160	53	19	1	1	4	2	5	3	4	4	2	3	3	3	1	2	1	1	3	2	3	3	1	2	2	3	3	3	3	3	2	2	1	1	1	2	3	2	1	2	2	3	3	2	2	3	2
7629	2	163	106	19	0	1	4	2	3	2	7	2	1	2	2	1	1	1	1	1	3	2	2	2	2	2	2	2	2	3	2	2	3	1	2	2	1	2	2	2	2	3	1	2	2	2	2	2	2
8728	1	172	74	19	1	1	4	2	3	2	7	3	3	2	2	2	1	2	2	1	1	2	2	2	2	2	2	2	2	2	2	2	2	2	2	2	2	2	2	2	2	2	2	2	2	2	2	2	2
8824	2	172	55	19	1	1	4	2	3	2	7	3	3	3	2	1	1	1	1	1	5	2	2	2	3	2	2	2	2	2	2	2	3	2	2	2	2	2	2	2	2	3	2	2	3	3	3	3	3
8521	2	160	55	19	1	1	4	2	3	2	7	3	1	1	2	1	1	1	1	1	1	3	2	3	2	1	3	2	3	2	3	3	3	3	3	3	1	2	3	3	2	2	1	3	3	3	3	3	2
8562	2	163	52	19	1	0	4	2	3	2	7	2	2	2	2	2	4	2	2	1	2	2	3	3	2	3	3	3	3	1	3	3	3	1	3	3	1	2	2	2	2	2	2	2	2	2	2	2	2
8603	2	157	45.2	19	0	0	4	2	3	2	7	3	2	3	2	2	1	3	1	1	1	2	2	2	2	1	3	3	2	2	2	2	2	2	2	2	2	2	2	2	2	2	2	2	2	2	2	2	2
8408	2	165	49	19	1	0	4	3	3	1	7	2	2	3	2	2	2	2	2	1	2	2	2	3	2	2	2	2	2	2	2	2	2	2	1	1	1	3	2	2	2	2	1	2	2	3	2	2	2
7754	1	170	110	19	1	0	4	2	4	3	5	2	2	1	2	1	1	1	1	1	1	1	2	3	2	1	3	2	3	1	3	3	2	3	1	1	1	1	3	1	2	3	1	1	3	3	3	3	1
9634	2	162	85	19	1	0	4	2	4	3	5	3	3	1	2	1	3	4	4	1	3	2	2	3	1	1	3	2	3	1	2	3	2	1	3	3	1	3	2	1	2	3	1	2	3	3	2	3	2
9327	2	155	45	19	0	0	4	2	4	3	5	2	1	1	2	1	1	1	1	1	1	2	2	3	2	2	2	2	2	2	2	2	2	2	2	2	1	2	2	2	2	3	1	2	2	2	2	2	2
11574	2	160	50	19	1	1	4	3	4	2	5	3	2	2	2	3	2	3	1	1	5	2	2	2	2	2	2	2	2	2	2	2	2	2	2	2	2	2	2	2	2	2	2	2	2	2	2	2	2
9637	1	175	90	19	0	1	4	2	2	2	8	5	5	5	1	3	3	3	3	3	1	2	2	2	2	2	2	2	2	2	2	2	2	2	2	2	2	2	2	2	2	2	2	2	2	2	2	2	2
7828	2	160	50	19	1	1	4	2	5	4	3	2	2	2	2	2	2	2	2	1	5	2	2	2	2	2	2	2	2	2	2	2	2	2	2	2	2	2	2	2	2	2	2	2	2	2	2	2	2
8685	1	180	120	19	1	1	4	4	4	1	5	2	1	1	3	1	1	1	1	1	5	3	3	3	2	2	3	3	3	2	3	3	3	2	2	1	1	2	2	2	2	2	2	2	3	3	3	3	3
7698	2	168	58	19	1	1	3	2	4	2	7	2	2	2	2	1	1	1	1	1	5	2	2	2	2	2	2	2	2	2	2	2	2	1	1	1	1	2	2	2	1	3	1	2	2	2	2	2	2
9867	1	168	55	19	0	1	3	2	4	2	7	3	2	1	2	1	1	1	1	1	1	1	1	1	3	1	1	1	1	3	2	2	3	1	1	1	1	3	1	1	1	1	1	1	1	1	1	1	1
7679	2	162	50	19	1	1	3	2	4	2	7	4	3	4	3	4	4	4	1	1	3	3	3	3	3	1	3	3	3	3	3	3	3	1	1	1	1	3	3	1	1	3	1	3	3	3	3	3	3
7552	2	170	70	19	1	0	4	3	3	2	6	3	2	3	3	1	1	1	3	1	2	2	2	2	2	2	2	2	2	2	2	2	3	2	2	2	1	2	2	2	2	2	2	2	2	2	2	2	2
11076	1	170	69	19	1	1	3	1	5	4	5	2	2	2	3	1	1	2	1	1	1	2	3	3	2	1	3	3	2	2	3	3	3	2	2	2	1	2	2	3	2	3	2	3	3	2	3	2	2
7668	1	167	50	19	0	0	3	1	5	4	5	2	1	1	2	1	1	1	1	1	1	2	2	2	2	1	2	3	2	2	2	2	3	1	1	2	1	2	2	3	2	3	2	2	2	3	3	3	2
11659	1	181	60	19	1	1	4	2	4	4	4	3	2	2	2	2	2	3	1	1	5	2	2	2	2	1	2	2	2	2	2	2	2	2	1	2	1	3	2	2	2	2	1	2	2	2	2	2	1
9831	2	167	59	19	1	1	4	4	3	1	6	5	3	5	3	4	1	4	1	1	5	2	2	2	2	2	2	2	2	2	2	2	2	2	2	2	2	2	2	2	2	2	2	2	2	2	2	2	2
9590	2	162	57	19	1	1	4	3	4	3	4	3	3	2	3	1	1	1	1	1	5	2	2	2	2	2	2	2	2	2	3	3	3	2	1	3	1	3	2	2	2	2	2	2	2	2	2	2	2
7574	1	178	83	19	0	1	3	2	3	2	8	3	3	1	3	1	2	2	1	1	1	1	1	2	3	2	2	1	2	2	2	2	2	2	2	2	2	2	2	2	2	2	2	2	2	2	2	2	2
7737	2	174	59	19	1	1	3	2	3	2	8	2	1	3	2	1	1	1	1	1	1	2	3	3	2	2	3	3	2	2	3	3	3	2	1	2	1	3	2	2	1	3	1	1	3	2	3	2	1
7479	1	175	110	19	0	0	3	2	3	2	8	2	2	2	2	2	1	1	1	1	5	2	2	2	2	2	2	2	2	2	2	2	2	2	2	2	2	2	2	2	2	2	2	2	2	2	2	2	2
9882	2	168	60	19	0	0	3	2	3	2	8	3	1	2	3	2	1	1	1	1	1	2	3	3	2	3	3	3	3	3	3	3	3	2	3	2	1	1	3	2	2	2	2	3	3	2	3	3	2
8541	2	160	55	19	0	0	3	2	3	2	8	2	1	2	2	1	2	1	1	1	1	2	2	2	2	2	2	2	2	2	2	2	2	2	2	2	2	2	2	2	2	2	2	2	2	2	2	2	2
9283	2	170	50	19	0	0	3	2	3	2	8	1	1	1	1	3	3	3	3	3	1	2	2	2	2	2	2	2	2	2	2	2	2	2	2	2	2	2	2	2	2	2	2	2	2	2	2	2	2
7590	2	153	47	19	0	0	3	2	3	2	8	2	3	2	2	3	2	1	2	1	3	2	3	3	1	2	3	2	3	2	2	3	3	2	1	2	1	3	3	3	3	3	2	3	3	3	3	3	2
10294	2	160	100	19	1	1	3	2	4	3	6	2	1	1	2	2	2	2	2	1	3	2	3	2	2	3	2	3	3	1	2	2	1	2	2	3	3	1	2	2	3	3	3	2	3	3	2	2	3
7532	1	185	70	19	1	1	4	3	3	3	5	3	2	3	3	1	1	1	1	1	1	2	2	2	2	2	2	2	2	2	2	2	3	2	3	2	1	3	2	2	3	2	2	2	2	3	2	2	2
9602	2	162	66	19	0	0	4	3	3	3	5	4	1	2	3	2	1	1	1	1	5	3	3	3	1	3	3	2	2	3	3	3	2	3	3	3	1	3	3	2	2	3	2	2	3	3	3	3	3
9295	2	163	49	19	1	0	4	3	3	3	5	2	2	3	2	3	3	3	3	3	2	2	2	2	2	2	2	2	2	2	2	2	2	2	2	2	2	2	2	2	2	2	2	2	2	2	2	2	2
9549	1	183	62	19	0	1	4	4	3	2	5	3	3	2	2	1	1	1	1	1	3	1	1	3	3	1	3	3	3	1	3	3	3	3	3	3	1	2	3	3	3	3	1	3	3	3	3	3	3
7819	2	165	53	19	1	1	4	4	3	2	5	2	2	2	2	1	1	1	1	1	1	2	3	3	2	2	3	2	3	2	3	3	2	2	2	2	2	2	3	3	3	2	2	3	2	3	2	3	2
9069	2	153	52	19	0	0	3	2	2	2	9	3	2	1	2	2	1	5	1	1	4	2	2	3	1	2	3	3	3	3	3	3	3	2	3	2	1	3	3	1	3	3	1	3	3	3	3	3	3
7680	2	169	84	19	1	1	3	2	5	4	4	4	2	3	3	3	3	3	1	1	3	2	2	2	2	2	2	2	2	2	2	2	2	2	2	2	2	2	2	2	2	2	2	2	2	2	2	2	2
9483	1	172	61	19	1	1	3	2	3	3	7	2	2	2	3	1	1	1	1	1	1	3	3	3	1	3	3	3	3	1	3	3	2	3	3	3	1	2	3	3	3	3	3	3	3	3	3	3	3
8245	2	170	60	19	0	0	3	2	3	3	7	2	2	4	2	1	1	1	1	1	3	3	3	3	3	3	3	3	3	3	3	3	3	2	3	1	1	3	3	3	3	2	3	3	3	2	3	3	3
10630	1	178	100	19	1	0	3	3	3	2	7	2	2	1	3	1	1	1	1	1	1	3	3	3	1	1	3	2	2	2	3	3	3	3	2	1	1	3	3	2	2	3	1	2	3	2	3	3	1
8012	1	183	71	19	1	0	3	3	4	3	5	3	2	3	3	1	1	1	1	1	1	3	3	3	1	1	3	3	3	1	3	3	3	2	3	1	1	2	3	2	2	3	1	3	3	3	2	3	2
9952	2	165	58	19	1	1	4	4	3	3	4	2	2	2	2	3	3	3	3	3	1	2	2	2	2	2	2	2	2	2	2	2	2	2	2	2	2	2	2	2	2	2	2	2	2	2	2	2	2
10815	2	165	63	19	0	1	2	2	4	3	7	2	2	3	3	1	1	1	1	1	1	2	2	2	2	2	2	2	2	2	2	2	3	2	2	2	1	2	2	2	2	2	2	2	2	2	2	2	2
8498	2	156	45	19	0	0	3	3	3	3	6	1	1	1	1	1	1	1	1	1	2	2	2	2	2	2	2	2	2	2	2	2	2	2	2	2	2	2	2	2	2	2	2	2	2	2	2	2	2
8577	2	154	43	19	0	0	3	5	3	1	6	2	1	2	2	3	3	3	3	3	3	2	2	2	2	2	2	2	2	2	2	2	2	2	2	2	2	2	2	2	2	2	2	2	2	2	2	2	2
7567	2	170	65	19	1	1	3	3	3	4	5	4	2	1	2	1	1	1	3	1	5	2	3	3	2	3	3	3	3	2	2	3	3	2	3	3	2	3	3	3	3	3	3	3	3	3	3	3	3
10820	1	170	75	19	0	1	5	2	4	1	5	3	2	2	3	1	1	1	1	1	1	3	3	3	1	3	3	3	3	1	3	3	3	2	3	3	1	2	3	3	3	3	1	3	3	3	3	3	2
9002	1	182	90	19	1	0	5	2	4	1	5	3	2	2	2	1	1	1	1	1	5	2	2	2	2	2	2	2	2	2	2	2	2	2	2	2	2	2	2	2	2	2	2	2	2	2	2	2	2
7369	1	178	149	19	1	1	5	2	5	2	3	3	4	2	2	3	3	3	3	1	2	2	2	2	2	2	2	2	2	2	2	2	3	2	2	2	2	2	2	2	2	2	2	2	2	2	2	2	2
9844	2	168	48	19	0	0	4	1	4	1	7	2	2	3	1	2	2	2	2	1	5	2	2	2	3	2	2	2	2	1	3	2	3	3	3	3	2	2	3	3	3	3	3	3	3	3	3	3	3
8527	1	170	70	19	0	1	4	1	4	2	6	5	5	5	3	4	3	5	4	1	3	2	2	3	2	3	3	3	2	1	3	2	1	3	3	3	1	1	2	3	1	2	3	3	2	2	3	2	1
8173	2	165	65	19	1	1	4	2	4	1	6	3	3	3	3	1	1	1	1	1	5	3	3	3	2	2	3	3	3	2	3	3	3	2	3	3	1	3	2	2	2	3	1	2	3	3	3	3	2
9980	2	173	49	19	1	1	4	2	4	1	6	2	4	1	2	1	1	1	1	1	1	2	2	2	2	2	2	2	2	2	2	2	2	2	2	2	2	2	2	2	2	2	2	2	2	2	2	2	2
9830	2	170	68	19	0	0	4	2	4	1	6	4	3	2	2	2	1	1	1	1	3	2	2	2	2	2	2	2	2	2	2	2	3	1	1	2	1	2	2	2	2	2	1	1	2	2	2	2	1
8575	2	167	62	19	1	1	5	1	2	3	6	3	1	1	2	1	2	1	1	1	1	3	2	3	2	2	3	3	3	1	3	3	3	2	2	2	1	3	1	2	2	3	1	2	2	2	3	3	2
11061	2	163	47	19	1	1	4	1	3	2	7	3	2	3	2	4	3	2	3	1	3	2	3	3	2	2	3	2	2	2	3	3	3	3	3	2	1	3	2	2	2	3	1	3	3	2	2	3	2
8835	1	180	65	19	0	0	4	2	3	1	7	2	2	2	2	3	3	3	3	3	1	2	2	2	2	2	2	2	2	2	2	2	2	2	2	2	2	3	3	2	2	3	1	2	3	3	2	1	1
7377	2	168	60	19	0	0	4	2	3	1	7	3	1	2	3	1	1	1	1	1	3	2	2	2	2	2	2	2	2	2	2	2	2	2	2	2	2	2	2	2	2	2	2	2	2	2	2	2	2
10490	2	170	70	19	1	1	4	2	4	2	5	3	1	3	2	3	3	3	3	3	1	2	2	2	2	2	2	2	2	2	2	2	2	2	2	2	2	2	2	2	2	2	2	2	2	2	2	2	2
9661	2	170	61	19	1	1	4	2	4	2	5	4	3	1	3	3	4	3	4	1	3	1	1	1	3	1	1	2	2	1	2	1	1	2	2	2	1	1	2	1	2	2	2	1	2	3	2	2	2
7308	1	182	72	19	0	0	4	2	4	2	5	2	2	3	2	1	1	1	1	1	1	1	2	2	2	2	2	2	2	2	2	2	3	2	2	2	2	2	2	2	1	2	2	2	2	3	3	3	3
8459	1	170	57	19	1	0	4	2	4	2	5	3	3	3	2	2	2	2	1	1	1	2	2	2	2	2	2	2	2	2	2	2	2	2	2	2	2	2	2	2	2	2	2	2	2	2	2	2	2
9105	2	169	55	19	1	0	4	2	4	2	5	1	1	1	1	2	2	2	2	2	3	2	2	2	2	2	2	2	2	2	2	2	2	2	2	2	2	2	2	2	2	2	2	2	2	2	2	2	2
8166	2	160	56	19	0	0	4	3	4	1	5	2	2	2	2	2	1	2	2	2	2	3	2	3	2	3	3	2	2	1	3	3	1	2	3	3	3	1	2	2	3	3	1	1	2	2	1	2	2
7998	1	170	62.5	19	1	0	4	2	2	1	8	3	4	4	3	5	2	2	2	1	3	2	2	2	2	1	2	2	2	2	2	2	3	2	2	2	2	2	2	2	2	2	2	2	2	2	2	2	2
9893	2	164	54	19	1	0	3	1	4	2	7	3	2	3	2	2	1	2	1	1	5	2	2	2	1	1	2	2	2	1	2	2	3	3	2	2	2	3	2	2	2	2	1	2	3	3	3	2	2
8057	1	170	80	19	1	1	4	2	3	2	6	5	5	5	3	1	3	2	2	1	5	3	3	3	1	3	3	3	3	3	3	3	1	2	3	3	1	3	3	3	3	3	3	3	3	2	3	3	3
9358	2	162	60	19	1	1	4	2	3	2	6	3	4	3	2	3	3	3	2	1	3	2	2	2	2	2	2	2	2	2	2	2	3	2	2	2	2	2	2	2	2	2	2	2	2	2	2	2	2
8552	2	162	50	19	1	0	3	2	5	2	5	4	3	5	3	3	3	2	4	2	3	1	2	3	2	1	3	2	2	1	3	3	1	1	1	3	1	3	2	1	2	3	1	3	3	3	2	2	1
7121	2	155	44	19	0	0	4	2	2	2	7	5	5	3	3	1	1	1	1	1	5	2	2	3	1	3	3	2	3	1	3	3	1	2	2	2	1	2	2	2	2	2	2	2	2	2	2	2	2
7653	2	160	52	19	0	0	3	2	3	1	8	2	2	2	2	2	2	2	2	2	2	2	2	2	2	2	2	2	2	2	2	2	2	2	2	2	2	2	2	2	2	2	2	2	2	2	2	2	2
10272	1	185	65	19	1	1	5	4	1	1	6	2	2	4	2	3	2	4	1	1	1	3	3	3	1	2	2	2	2	2	2	2	2	2	2	2	2	2	2	2	2	2	2	2	2	2	2	2	2
8544	2	168	58	19	1	1	3	2	4	2	6	2	1	4	2	1	2	2	1	1	3	2	2	2	2	2	2	2	2	2	2	2	2	2	2	2	2	2	2	2	2	2	1	2	2	2	2	2	2
7633	2	153	82	19	1	0	3	2	4	2	6	2	1	2	2	1	1	1	1	1	3	2	2	2	1	2	2	3	3	2	2	2	3	1	2	2	1	3	2	2	2	2	2	2	2	2	2	2	2
10391	2	164	59	19	0	0	3	2	4	2	6	2	2	1	2	1	3	3	4	1	1	2	2	2	2	3	3	3	3	1	3	3	3	3	1	2	1	3	3	3	3	3	1	3	3	3	3	3	3
10237	2	163	55	19	0	0	3	2	4	2	6	3	2	1	2	2	1	1	1	1	1	1	1	2	2	2	2	2	2	2	2	2	2	2	2	1	2	3	2	2	2	2	2	2	2	2	2	2	2
6919	1	173	50	19	0	0	3	2	4	2	6	2	4	3	2	3	3	3	3	3	1	2	2	2	2	2	2	2	2	2	2	2	2	2	2	2	2	2	2	2	2	2	2	2	2	2	2	2	2
9392	2	158	50	19	0	0	3	2	4	2	6	3	1	3	2	1	2	1	3	1	2	2	2	3	2	2	2	2	2	2	2	2	2	2	3	2	1	3	2	2	2	2	2	2	2	2	2	2	2
10640	1	181	76	19	1	1	4	3	3	2	5	2	1	1	2	1	1	1	1	1	1	3	3	3	2	3	3	3	2	1	3	3	3	2	2	3	1	3	2	2	2	2	2	3	3	2	3	3	3
8791	1	170	68	19	1	1	4	3	3	2	5	2	2	1	2	1	1	1	1	1	1	3	3	3	1	3	3	3	3	3	3	3	3	2	3	1	1	3	2	1	3	3	3	3	3	2	3	3	3
7880	1	185	90	19	0	1	4	3	4	3	3	4	1	1	2	1	1	1	1	1	3	2	2	2	2	2	2	2	2	3	2	2	3	2	2	1	1	3	2	2	2	3	2	3	3	2	2	2	2
7443	1	171	98	19	1	1	3	2	3	2	7	2	1	1	2	1	1	1	1	1	1	1	3	3	3	2	3	3	3	1	3	1	2	1	1	1	1	3	1	1	1	1	1	1	1	3	3	1	1
12135	2	163	63	19	0	1	3	2	3	2	7	2	2	2	2	1	1	1	3	1	1	2	2	2	2	2	2	2	2	2	2	2	2	2	2	2	2	2	2	2	2	2	2	2	2	2	2	2	2
11124	2	165	60	19	0	1	3	2	3	2	7	2	1	2	2	1	1	1	1	1	3	2	2	2	2	2	2	2	2	2	2	2	3	2	2	2	1	3	2	2	2	2	2	2	2	2	2	2	2
10905	2	165	56	19	1	1	3	2	3	2	7	4	4	4	3	3	4	3	2	1	3	2	2	2	2	2	2	2	2	2	2	2	2	2	2	2	2	2	2	2	2	2	2	2	2	2	2	2	2
8005	2	168	55	19	1	1	3	2	3	2	7	3	3	4	3	3	4	2	2	1	3	3	3	3	1	1	3	3	3	2	2	2	2	2	3	1	3	2	3	3	3	3	1	3	3	2	2	2	3
9203	1	178	75	19	0	0	3	2	3	2	7	3	2	1	2	1	1	1	2	1	5	3	3	3	2	2	2	3	3	2	3	3	3	1	2	2	1	2	2	2	3	3	2	2	3	2	3	3	2
7167	2	170	65	19	0	0	3	2	3	2	7	1	1	2	2	2	2	2	2	1	1	2	2	2	2	1	2	2	2	3	2	2	3	2	2	2	1	3	2	2	1	2	2	2	2	2	2	2	2
9059	2	164.1	60	19	0	0	3	2	3	2	7	4	1	5	3	4	3	4	1	1	2	2	2	2	2	1	2	3	2	2	2	2	2	2	1	3	1	1	3	3	3	3	1	3	1	3	3	3	1
8010	2	168	58	19	0	0	3	2	3	2	7	2	2	1	2	1	1	1	1	1	1	3	3	3	1	3	3	3	3	3	3	3	3	3	2	1	1	3	2	1	2	3	3	3	3	2	3	3	3
8947	2	152	41	19	0	1	3	1	4	4	5	2	1	2	2	1	1	1	1	1	1	2	2	2	2	2	2	2	2	2	2	2	3	2	2	2	2	2	2	2	2	2	2	2	2	2	2	2	2
7054	1	173	70	19	1	0	4	4	2	1	6	2	2	3	2	2	2	1	1	1	2	2	2	2	2	2	2	2	2	2	2	2	2	2	2	2	1	3	2	3	2	2	1	2	2	3	2	2	1
8653	2	163	66	19	1	0	3	2	4	3	5	2	2	1	2	1	1	1	1	1	5	3	3	3	2	2	2	2	2	2	2	2	2	2	2	2	2	2	2	2	2	2	2	2	2	2	2	2	2
10650	1	170	60	19	1	1	4	4	3	2	4	2	3	3	2	1	1	1	1	1	3	3	3	3	1	3	3	3	3	1	3	3	1	3	3	3	3	1	3	3	3	3	3	3	3	3	3	3	3
8518	1	174	72	19	0	1	3	2	3	3	6	3	1	1	2	3	1	1	1	1	1	3	3	3	1	2	3	3	3	1	2	2	1	2	1	3	3	2	1	3	2	2	3	3	3	1	2	2	3
8943	2	158	53	19	1	1	3	3	4	3	4	4	1	4	3	1	1	1	1	1	5	2	2	3	1	3	3	2	1	3	3	3	3	3	2	2	1	3	3	2	2	2	2	2	3	3	2	3	2
5776	2	170	100	19	1	0	4	4	4	4	1	5	5	5	3	3	5	3	5	1	3	3	3	3	3	1	3	1	1	1	3	3	1	1	1	3	1	1	3	1	3	3	1	1	3	3	3	3	1
7274	1	170	62	19	1	1	3	3	3	3	5	1	1	1	2	1	1	1	1	1	3	2	3	3	1	1	3	2	2	1	3	3	1	2	1	3	1	2	2	3	2	2	1	1	3	3	3	3	1
9376	2	172	58	19	0	0	3	3	3	3	5	1	1	3	2	2	1	3	2	1	3	2	2	3	2	2	2	2	2	2	2	2	2	2	2	2	1	3	2	2	2	2	2	2	2	2	2	2	2
7650	2	158	45	19	0	0	3	3	3	3	5	2	2	3	2	2	2	3	1	1	3	2	3	3	1	2	3	2	2	2	1	2	2	2	1	2	1	3	2	3	2	3	2	3	3	3	2	3	2
8448	2	162	80	19	0	1	2	2	2	2	9	2	2	2	2	1	1	1	1	1	2	2	2	2	1	2	3	3	3	2	3	2	2	2	1	3	1	3	2	2	2	1	1	1	3	3	2	2	2
8539	2	155	51	19	1	1	2	3	3	3	6	2	1	3	2	1	1	5	5	1	5	2	2	2	2	1	2	2	2	2	2	2	2	2	1	2	1	2	2	2	2	2	2	2	2	2	2	2	2
8286	1	173	75	19	1	0	2	3	2	3	7	3	3	4	2	3	2	2	2	1	3	3	3	3	3	2	2	3	3	2	3	3	2	3	2	2	1	3	3	2	3	2	2	3	3	3	3	3	1
8846	2	163	75	19	0	0	2	3	2	3	7	2	1	1	2	1	1	1	1	1	5	2	3	3	2	3	3	2	2	2	3	3	3	2	1	2	1	3	2	2	3	3	2	3	3	3	3	3	2
10194	1	178	60	19	0	0	5	1	4	1	5	1	1	2	2	1	1	1	1	1	3	2	2	2	2	2	2	2	2	2	2	2	2	2	2	2	2	2	2	2	2	2	2	2	2	2	2	2	2
9476	1	174	65	19	1	1	5	1	3	2	5	2	4	1	2	1	1	1	1	1	1	2	2	2	2	2	2	2	2	2	2	2	2	2	2	2	2	2	2	2	2	2	2	2	2	2	2	2	2
9925	2	163	49.9	19	1	0	4	1	4	1	6	3	3	3	2	1	1	1	2	1	5	1	3	3	2	1	2	2	3	2	3	3	2	1	1	3	2	3	2	2	2	3	1	2	2	3	3	3	2
8105	2	160	52	19	0	1	4	1	3	1	7	2	1	2	2	1	1	1	1	1	5	2	2	3	2	2	3	3	3	2	3	3	3	2	2	2	1	3	2	2	2	3	2	3	3	3	3	3	2
7189	1	178	69	19	1	1	4	1	4	2	5	2	2	1	2	1	1	1	1	1	5	1	3	3	3	3	3	3	3	3	3	3	3	2	2	1	1	2	2	2	2	3	1	2	2	2	2	3	2
6991	2	167	55	19	1	0	4	1	4	2	5	4	2	3	3	2	2	2	1	1	3	2	2	2	2	2	2	2	2	2	2	2	3	1	2	2	2	2	2	2	2	2	2	2	2	2	2	2	2
11095	1	168	50	19	1	1	5	2	3	2	4	3	2	2	2	2	2	2	2	1	3	3	2	2	1	3	2	3	3	3	3	3	3	3	1	3	1	3	3	3	3	3	1	3	3	2	3	2	3
7647	1	182	78	19	1	1	4	2	4	1	5	3	2	1	2	3	1	1	1	1	5	2	2	2	1	3	2	3	3	3	3	2	3	2	2	2	1	3	2	2	3	3	2	3	3	2	3	3	2
8963	2	168	130	19	0	0	4	2	4	1	5	3	1	2	2	2	1	2	1	1	2	1	2	2	2	1	2	2	2	2	2	1	2	2	1	2	1	2	1	2	2	2	1	1	2	2	2	2	1
7347	2	166	51	19	1	1	3	1	4	1	7	3	3	4	2	1	1	1	1	1	1	1	1	1	1	1	3	2	2	1	2	2	3	3	3	3	1	2	2	3	3	3	1	1	1	3	1	1	3
7944	2	163	58	19	0	0	3	1	4	1	7	2	2	2	2	3	2	2	1	1	3	2	2	2	3	1	2	2	2	2	1	2	2	1	1	2	1	3	1	2	2	2	1	2	2	2	2	2	1
7984	2	167	45	19	0	1	3	1	3	1	8	4	2	3	3	1	1	1	1	1	5	2	2	2	2	2	2	2	2	2	2	2	2	2	2	2	2	3	2	1	2	2	1	2	2	2	2	2	2
7637	2	170	116	19	1	1	4	2	3	2	5	3	2	3	2	2	2	2	2	2	5	3	3	3	2	2	2	3	3	2	3	3	2	2	2	3	1	3	3	2	3	2	2	2	3	3	2	3	2
10505	1	173	75	19	0	1	4	2	3	2	5	2	2	2	2	1	1	1	1	1	1	2	2	3	3	3	2	3	3	2	3	3	3	3	2	2	1	3	2	1	3	2	3	2	2	3	3	2	2
10776	2	164.6	55	19	0	1	4	2	3	2	5	3	2	3	3	3	2	4	3	1	3	2	2	2	2	2	2	2	3	2	2	2	3	2	1	2	1	3	2	2	2	3	2	2	3	2	2	3	2
10694	2	165	47	19	0	0	4	2	3	2	5	5	5	5	3	2	2	2	1	1	5	3	3	3	1	3	3	3	3	2	3	3	1	3	3	1	1	2	2	2	2	2	2	2	2	2	2	2	2
8439	2	173	54	19	1	1	3	2	4	1	6	3	4	3	2	3	1	1	1	1	3	2	2	2	2	1	2	2	2	2	2	2	2	2	2	2	2	2	2	2	2	3	2	2	2	2	2	2	2
8437	2	162	56	19	0	0	4	3	3	1	5	4	2	1	2	2	2	3	2	1	4	2	3	2	3	2	3	2	2	2	2	3	2	2	3	3	1	2	2	3	3	3	2	3	3	2	2	3	3
9858	2	163	45	19	1	0	4	3	3	1	5	2	2	1	2	3	1	1	1	1	3	2	2	2	2	2	2	2	2	2	2	2	2	2	2	2	2	2	2	2	2	2	2	2	2	2	2	2	2
7403	2	160	44	19	0	0	4	3	4	2	3	2	2	3	2	1	1	1	1	1	1	2	2	2	2	2	2	2	2	2	2	2	2	2	2	2	2	2	2	2	2	2	2	2	2	2	2	2	2
8668	2	171	69	19	0	0	3	1	3	2	7	2	3	4	3	1	1	1	1	1	3	3	3	3	1	2	3	3	3	2	2	2	2	2	2	2	2	2	2	2	2	2	2	2	2	2	2	2	2
8345	2	180	70	19	1	1	3	2	3	1	7	2	1	1	2	1	2	1	1	1	1	2	2	2	2	2	2	2	2	2	2	2	3	2	2	2	2	2	2	2	2	2	2	2	2	2	2	2	2
10096	2	161	60	19	0	0	3	2	3	1	7	2	2	2	2	1	1	3	2	1	3	2	3	3	1	3	3	2	2	2	3	3	2	2	1	1	2	3	2	2	3	3	2	2	3	2	2	2	2
7634	2	158	50	19	1	0	3	2	3	1	7	2	2	2	2	2	1	1	1	1	2	2	2	3	2	3	2	3	3	1	3	3	3	2	2	1	1	3	2	2	2	2	1	2	3	2	3	3	2
9214	1	185	92.5	19	1	1	3	2	4	2	5	2	1	2	3	1	1	1	1	1	1	3	3	3	1	3	3	3	3	1	3	3	1	3	3	3	3	1	3	3	3	3	3	3	3	3	3	3	3
11207	2	168	65	19	1	1	3	2	4	2	5	3	2	3	3	2	1	1	1	1	3	2	3	3	1	3	3	3	3	2	2	2	3	2	3	3	1	3	2	2	2	2	2	2	3	3	2	3	3
7815	2	158	45	19	0	0	2	1	3	1	9	3	3	2	2	3	3	3	3	3	3	2	2	2	2	2	2	2	2	2	2	2	2	2	2	2	2	2	2	2	2	2	2	2	2	2	2	2	2
6960	1	179	80	19	0	1	3	2	2	1	8	2	3	1	3	1	1	1	1	1	3	2	2	2	2	2	2	2	2	2	2	2	2	2	3	2	1	2	3	2	3	3	2	3	3	3	2	3	2
9433	2	165	58	19	0	0	3	2	2	1	8	3	4	3	1	3	2	3	1	1	3	2	2	3	3	1	3	3	3	2	3	3	3	1	1	2	1	3	3	2	3	3	1	2	3	3	3	3	1
7252	2	159	58	19	1	0	3	2	2	1	8	2	2	3	3	2	2	2	1	1	2	3	3	3	1	3	3	3	3	1	3	3	3	2	3	1	1	2	2	1	2	3	3	3	3	3	3	3	3
9268	2	165	52	19	1	1	3	2	5	3	3	3	2	2	3	2	1	1	1	1	2	3	3	3	3	2	3	2	2	2	3	3	3	2	2	3	1	2	2	3	2	2	1	2	3	1	3	3	1
8840	2	158.5	64	19	0	0	3	1	3	3	6	2	2	3	2	4	2	3	1	1	5	3	3	3	2	2	2	2	3	2	2	3	3	2	2	2	1	3	2	1	3	3	2	3	3	2	2	2	2
7253	1	173	70	19	0	1	3	2	3	2	6	1	1	1	2	1	1	1	1	1	1	2	2	2	2	2	2	2	2	2	2	2	2	2	2	2	2	2	2	2	2	2	2	2	2	2	2	2	2
9559	1	175	66	19	0	1	3	2	3	2	6	3	2	2	2	2	2	1	1	1	2	3	3	3	2	2	3	2	3	2	3	3	3	2	2	2	1	3	2	2	2	2	2	3	3	2	2	3	2
7817	1	165	60	19	1	1	3	2	3	2	6	3	4	2	2	2	2	2	2	1	3	2	2	2	2	2	3	2	2	2	2	3	3	2	1	2	1	2	3	3	3	2	1	2	3	2	2	3	1
8275	2	167	53	19	1	1	3	2	3	2	6	3	2	3	2	1	1	1	1	1	3	2	3	3	2	3	3	2	3	2	1	1	3	2	2	1	1	2	3	1	3	3	2	3	3	3	1	2	1
11085	2	167	49	19	0	1	3	2	3	2	6	3	2	3	3	1	1	1	1	1	3	3	3	3	1	2	2	2	3	2	2	3	3	1	1	2	1	2	2	1	2	3	1	2	3	3	3	3	1
8182	2	160	48	19	0	1	3	2	3	2	6	3	2	3	3	4	2	2	1	1	5	2	2	2	2	1	2	2	2	2	2	2	2	2	2	2	1	2	2	2	2	2	2	2	2	2	2	2	2
8117	2	165	42	19	1	1	3	2	3	2	6	3	3	3	3	3	3	3	3	1	2	1	2	2	2	1	2	2	2	2	2	2	2	2	2	2	2	2	2	2	2	1	2	1	1	2	1	2	1
9212	2	170	65	19	0	0	3	2	3	2	6	1	1	3	2	1	1	1	1	1	1	3	3	2	2	1	1	3	3	2	2	2	3	3	1	3	1	2	2	2	2	3	2	3	3	3	3	3	2
10211	2	165	55	19	0	0	3	2	3	2	6	4	4	2	3	2	2	2	5	2	3	3	3	3	1	2	3	3	2	3	2	2	2	2	2	2	1	2	2	2	2	2	3	2	2	3	3	3	2
7844	2	163	46	19	1	0	3	3	3	1	6	3	2	2	2	3	2	2	1	1	3	2	2	2	2	2	2	2	2	2	2	2	2	2	2	2	2	2	2	2	2	2	2	2	2	2	2	2	2
7639	2	163	48	19	1	1	3	2	2	2	7	2	4	2	3	1	1	2	1	1	1	2	2	2	2	2	2	2	2	2	2	2	3	1	2	2	2	2	3	2	3	3	2	2	3	2	3	3	2
10332	2	161	92	19	0	0	3	2	2	2	7	2	4	2	2	2	2	2	2	2	5	2	2	3	2	2	3	2	3	2	2	3	2	2	2	2	1	2	3	2	2	2	2	3	2	2	2	2	2
6921	2	170	60	19	0	0	3	2	2	2	7	3	1	4	2	1	1	1	1	1	5	3	3	3	2	1	3	3	2	2	3	3	1	1	1	1	1	2	3	1	1	3	1	2	3	3	3	3	1
9841	2	160	57	19	0	0	3	2	2	2	7	2	1	4	2	2	1	3	4	1	5	2	2	3	2	3	3	3	3	2	3	3	3	2	3	2	1	2	2	2	2	3	2	3	3	3	3	3	3
9231	1	191	120	19	0	1	2	2	3	1	8	1	1	3	2	1	1	1	1	1	1	1	2	2	2	2	2	2	2	2	2	2	2	2	2	2	2	2	2	2	2	2	2	2	2	2	2	2	2
9707	2	162	47	19	1	0	3	3	2	1	7	3	1	3	2	4	2	5	4	5	1	3	2	1	2	2	2	2	3	2	1	3	2	2	3	2	2	2	3	3	3	2	1	2	2	2	3	3	2
9934	1	185	75	19	1	0	3	2	3	3	5	3	4	4	2	1	3	1	1	1	2	2	2	2	2	2	2	2	2	2	2	2	2	2	2	2	2	2	2	2	2	2	2	2	2	2	2	2	2
7922	1	156	56	19	0	0	2	2	4	2	6	2	2	3	2	2	3	4	1	1	2	2	3	3	2	3	3	3	3	2	3	3	2	2	2	2	2	2	3	3	3	3	2	3	3	2	2	2	2
8255	2	152	49	19	0	1	3	4	3	1	5	4	2	4	2	3	1	2	1	1	5	2	2	3	1	1	2	2	2	1	3	2	2	1	2	2	1	3	1	2	2	2	1	2	1	2	1	1	1
8039	1	170	55	19	0	0	2	2	3	2	7	2	1	2	2	1	2	1	1	1	2	2	2	2	2	2	2	2	2	2	2	2	2	2	2	2	2	2	2	2	2	2	2	2	2	2	2	2	2
8331	1	177	61	19	0	0	3	3	3	3	4	1	1	4	2	3	3	3	3	1	2	2	2	2	2	2	2	2	2	2	2	2	2	2	2	2	2	2	2	2	2	2	2	2	2	2	2	2	2
9713	1	176	60	19	1	0	2	2	2	2	8	3	3	5	3	1	1	1	1	1	3	2	2	2	2	2	3	3	2	2	2	2	3	2	1	2	1	3	2	2	3	3	1	3	3	3	3	3	2
7933	2	164	55	19	0	0	2	2	2	2	8	2	2	4	2	2	2	2	1	1	1	3	3	3	2	1	3	2	3	2	3	3	3	3	3	2	1	3	2	2	2	3	2	3	3	3	3	3	2
9143	2	169	64	19	0	0	3	3	2	3	5	2	2	2	2	2	2	3	2	1	2	2	2	2	2	2	2	3	3	2	2	2	2	2	2	2	1	3	2	2	3	2	2	2	2	2	2	2	2
7304	2	166	53	19	1	1	2	2	4	4	4	4	2	2	2	2	2	2	2	2	2	2	2	2	2	2	2	2	2	2	2	2	2	2	2	2	2	2	2	2	2	2	2	2	2	2	2	2	2
8923	1	189	98	19	0	1	2	3	4	3	4	3	2	4	3	3	2	4	1	1	3	2	2	3	2	1	3	2	3	2	2	2	2	2	1	3	1	2	2	2	2	2	2	2	2	2	2	2	1
10308	1	178	75	19	0	1	2	3	2	2	7	2	2	2	2	3	1	1	1	1	1	3	3	3	2	2	3	2	3	3	3	3	3	2	2	3	2	3	3	3	2	3	2	3	3	3	3	3	3
7594	1	183	76	19	1	0	1	4	4	1	6	5	5	2	3	3	3	3	3	3	2	2	2	2	2	2	2	2	2	2	2	2	2	2	2	2	2	2	2	2	2	2	2	2	2	2	2	2	2
10132	1	169	56	19	1	0	5	1	4	1	4	2	2	2	2	3	1	1	1	1	3	3	1	2	3	1	3	3	1	2	2	2	2	1	1	2	1	2	1	3	2	3	1	1	3	1	2	2	1
9766	1	176	75	19	1	1	4	1	5	1	4	5	5	4	3	5	4	3	3	4	3	2	3	2	1	2	1	2	3	2	3	2	2	3	3	3	2	2	3	3	2	2	3	2	2	2	3	2	3
7258	2	171	88	19	0	0	4	1	4	1	5	2	1	2	3	1	1	1	1	1	1	2	2	3	1	3	3	3	3	1	3	3	1	3	3	3	1	2	2	3	3	3	3	3	3	3	3	3	3
7964	2	158	60	19	0	0	4	1	4	1	5	2	1	1	2	1	1	1	1	1	1	2	3	2	2	2	2	3	3	3	3	3	3	2	2	2	1	2	2	2	3	3	1	2	3	2	3	3	2
8993	2	156	48	19	0	0	4	1	4	1	5	3	3	2	3	2	2	2	1	1	3	2	2	3	2	1	3	3	3	2	3	3	3	3	2	2	2	3	3	3	3	3	3	2	3	3	3	3	3
7908	1	178	86	19	0	1	4	1	3	1	6	3	1	3	3	1	1	1	1	1	4	2	2	2	2	2	3	3	3	3	2	3	3	3	2	3	1	2	2	2	3	1	3	3	3	3	3	3	3
10253	1	181	80	19	1	0	4	1	3	1	6	3	2	3	2	1	1	1	1	1	1	2	2	3	2	1	2	2	3	3	3	3	3	2	2	2	1	3	2	1	2	3	2	2	3	3	3	2	2
7862	1	175	68	19	0	0	4	1	3	1	6	2	2	4	2	2	2	2	2	1	3	2	3	2	2	1	2	2	2	2	2	2	2	2	2	2	2	2	2	2	2	2	2	2	2	2	2	2	2
7939	1	170	65	19	0	1	3	1	5	1	5	3	2	2	2	3	3	5	1	1	5	3	3	3	1	2	3	2	3	2	2	3	3	3	3	3	1	2	3	2	3	3	1	2	2	3	3	3	3
7948	1	175	65	19	0	0	5	2	3	2	3	2	1	1	2	1	1	1	1	1	1	3	3	3	3	3	3	3	3	3	3	3	3	1	1	2	1	2	2	2	2	2	2	2	2	2	2	2	2
8077	2	160	49	19	1	1	4	2	4	1	4	3	2	4	3	2	1	3	1	1	3	2	2	3	1	1	3	2	2	2	3	2	2	2	2	1	1	3	2	3	1	3	2	2	2	3	3	2	1
10805	1	170	89	19	0	0	4	2	4	1	4	2	2	2	3	3	3	2	4	1	3	2	2	2	2	2	2	2	2	2	2	2	2	2	2	2	2	3	2	2	2	2	2	2	2	2	2	2	1
9299	2	160	58	19	1	0	4	2	4	1	4	4	3	3	2	1	1	1	1	1	1	1	1	2	2	1	2	3	3	2	2	2	2	2	1	2	1	2	3	3	1	2	2	2	2	2	2	2	2
7990	1	175	65	19	1	1	4	1	2	1	7	2	1	2	2	1	1	1	1	1	5	2	2	2	2	2	2	2	2	2	2	2	2	2	2	2	2	2	2	2	2	2	2	2	2	3	2	2	2
7018	1	170	60	19	0	1	4	2	5	2	2	5	2	4	1	1	1	1	1	1	5	2	2	2	3	1	3	2	2	3	2	2	1	2	2	2	1	1	2	2	2	1	1	1	1	2	2	2	2
8313	2	165	54	19	1	1	5	3	4	2	1	2	2	3	2	2	2	2	2	2	1	2	2	2	2	2	2	2	2	2	2	2	2	2	2	2	2	1	3	3	3	3	3	3	3	3	3	3	3
10210	1	178	107	19	1	1	4	1	3	2	5	2	1	2	2	2	1	5	3	1	5	3	3	3	1	3	3	3	3	1	3	3	3	3	3	3	1	1	3	2	3	3	1	3	3	1	3	3	1
10111	2	155	48	19	1	1	4	1	3	2	5	3	2	3	2	1	1	1	1	1	1	2	2	2	2	1	2	2	2	2	2	2	3	2	2	2	1	3	2	2	2	3	1	2	2	2	2	2	2
11038	1	172	80	19	0	0	4	1	3	2	5	3	2	2	2	2	3	2	2	1	3	2	3	3	3	2	3	3	3	1	3	3	2	2	2	2	1	3	2	1	2	2	1	3	3	3	3	3	1
7855	1	177	75	19	1	1	3	1	4	1	6	2	1	4	2	2	2	2	3	2	5	2	2	2	2	2	2	2	2	2	2	2	2	2	2	2	2	2	2	2	2	2	2	2	2	2	2	2	2
8424	2	162	75	19	0	1	3	1	4	1	6	3	3	3	2	2	2	2	2	2	2	2	2	2	2	2	2	2	2	2	2	2	2	2	2	2	2	2	2	2	2	2	2	2	2	2	2	2	2
7576	1	175	70	19	1	1	4	2	3	1	5	3	3	3	3	3	3	5	3	2	1	2	2	2	1	1	2	2	1	1	2	2	3	3	1	3	2	3	2	3	1	2	3	2	3	2	2	2	1
7810	2	160	115	19	1	1	4	2	4	2	3	4	4	4	3	2	2	2	2	2	1	2	2	2	2	2	2	2	2	2	2	2	2	2	2	2	2	2	2	2	2	2	2	2	2	2	2	2	2
9286	2	165	60	19	0	0	4	1	2	2	6	3	2	2	3	2	1	1	2	1	5	2	2	2	2	1	2	2	2	3	3	3	3	2	2	2	1	1	2	1	2	2	1	2	2	2	1	3	1
11224	2	160	65	19	0	1	3	1	3	1	7	2	2	3	3	4	3	2	3	3	3	2	1	2	2	2	1	2	2	2	2	2	2	2	2	2	2	2	2	2	2	2	2	2	2	2	2	2	2
8319	2	176	58	19	1	1	3	1	3	1	7	2	1	1	2	2	1	1	1	1	1	2	3	3	2	2	3	3	3	2	2	3	3	2	2	2	1	2	2	2	3	3	1	3	3	2	2	2	1
8656	2	165	54	19	1	1	3	1	3	1	7	3	2	3	3	1	1	1	1	1	5	2	3	3	2	1	2	2	2	3	3	3	3	2	3	2	1	3	3	1	3	3	2	3	3	2	3	3	2
12585	2	172	85	19	0	0	3	1	3	1	7	1	2	4	2	1	3	1	2	1	3	2	2	2	2	2	2	2	2	2	2	2	3	2	2	2	2	2	2	2	2	2	2	2	2	2	2	2	2
7772	1	185	80	19	0	0	3	1	3	1	7	5	1	1	1	3	3	3	3	3	1	2	2	2	2	2	2	2	2	2	2	2	2	2	2	2	2	2	2	2	2	2	2	2	2	2	2	2	2
10388	2	170	60	19	0	0	3	1	3	1	7	3	2	3	2	1	1	1	2	1	3	2	1	1	1	2	2	2	2	2	2	2	2	1	1	2	1	3	2	2	2	3	1	1	2	2	2	2	1
8296	2	166	55	19	1	0	3	1	3	1	7	4	2	2	2	3	1	4	4	1	3	2	2	2	2	2	2	2	2	2	2	2	2	2	2	2	2	2	2	2	2	2	2	2	2	2	2	2	2
10426	2	164	54	19	0	0	3	1	3	1	7	3	2	4	2	3	2	2	1	1	3	3	3	3	3	3	3	3	3	2	3	3	3	3	3	3	1	2	3	3	2	3	3	3	3	3	3	3	2
9024	2	158	50	19	0	0	3	1	3	1	7	1	1	5	3	1	1	1	1	1	1	3	3	2	3	2	2	2	2	2	2	2	2	2	2	2	2	2	2	2	2	2	2	2	2	2	2	2	2
10420	2	169	59	19	0	0	4	2	2	1	6	2	1	1	3	1	1	1	1	1	3	3	3	3	2	3	3	3	3	1	3	3	3	3	3	3	1	3	3	2	3	3	2	3	3	3	3	3	3
9048	2	164	64	19	1	1	3	1	4	2	5	3	2	3	2	1	1	1	1	1	3	2	2	2	2	1	3	3	3	2	2	2	3	2	3	2	1	3	2	2	2	3	3	3	3	2	2	2	1
11052	1	185	150	19	0	0	3	2	4	1	5	2	1	1	2	1	1	1	1	1	1	3	3	3	1	3	3	3	3	1	3	3	1	3	3	3	3	1	3	3	3	3	3	3	3	3	3	3	3
11194	1	173	65	19	0	1	4	3	3	1	4	3	2	2	2	1	1	1	2	1	1	2	2	2	2	2	2	2	2	2	2	2	3	1	2	2	1	3	2	2	2	2	2	2	2	2	2	2	2
7598	2	168	60	19	0	0	3	1	2	1	8	3	2	2	2	2	2	2	2	2	1	2	2	2	2	2	2	2	2	2	2	2	2	2	2	2	2	2	2	2	2	2	2	2	2	2	2	2	2
8063	2	169	140	19	0	0	4	2	2	2	5	2	3	3	2	1	1	1	1	1	3	2	2	2	2	1	2	2	2	2	1	2	2	2	1	2	1	2	2	2	2	2	1	2	2	2	2	2	2
9377	2	163	58	19	0	0	4	2	2	2	5	3	3	4	3	2	3	3	1	1	5	3	3	3	1	3	3	3	3	1	3	3	2	1	2	2	1	2	2	2	2	2	2	2	2	2	2	2	2
7750	2	163	51	19	0	1	3	2	3	1	6	3	2	1	2	1	1	1	1	1	1	2	3	2	2	1	2	2	2	3	3	2	3	2	3	1	1	3	2	3	1	3	3	2	2	3	3	3	3
10230	2	165	69	19	1	0	3	2	3	1	6	1	1	2	1	2	3	2	2	1	1	2	2	3	2	2	2	2	2	2	2	2	3	2	1	2	1	2	2	2	2	2	2	2	2	2	2	2	2
10582	1	172	80	19	0	0	4	3	2	1	5	2	2	2	2	3	3	3	3	3	3	2	2	2	2	2	2	2	2	2	2	2	2	2	2	2	2	2	2	2	2	2	2	2	2	2	2	2	2
8101	2	168	56	19	1	0	4	2	3	3	3	4	4	5	3	4	3	3	2	1	5	2	2	2	2	2	2	2	2	2	2	2	2	2	2	2	2	2	2	2	2	2	2	2	2	3	2	2	2
8822	1	175	75	19	0	0	3	2	2	1	7	3	2	2	2	2	1	1	1	1	3	2	2	2	2	2	2	2	2	2	2	2	2	3	2	2	1	3	2	1	2	2	1	2	2	3	2	2	2
8632	2	165	75	19	0	0	3	2	2	1	7	3	2	3	2	1	2	2	2	1	3	2	2	2	1	2	3	3	3	3	2	2	3	2	2	2	1	3	2	2	2	3	1	2	3	2	2	2	1
8925	2	152	50	19	0	0	3	2	2	1	7	3	3	3	2	5	5	5	5	3	5	3	3	3	1	3	3	3	3	1	2	3	2	2	3	2	2	2	2	2	3	3	2	3	3	2	2	3	3
7052	2	167	78	19	1	0	3	1	3	3	5	2	1	1	2	1	1	1	1	1	1	3	3	3	2	3	3	3	3	3	3	3	3	1	2	1	1	3	2	2	2	3	2	2	3	2	3	3	2
8125	1	172	69	19	0	1	3	2	3	2	5	2	2	2	2	1	1	2	2	1	2	3	3	3	1	3	3	3	3	2	3	3	3	2	3	3	1	3	2	3	2	3	2	3	3	2	2	3	2
9577	2	150	47	19	0	1	3	2	3	2	5	3	2	3	3	3	1	4	1	1	4	2	2	2	2	1	2	2	2	2	2	2	2	1	2	1	3	2	2	2	2	1	1	2	2	2	2	2	2
10291	1	177	62	19	0	0	3	2	3	2	5	2	2	2	2	1	1	1	1	1	1	3	3	3	1	2	2	3	3	2	3	3	2	2	2	1	1	3	3	2	3	3	3	3	3	3	3	3	3
8779	2	165	55	19	1	0	3	2	3	2	5	2	2	2	2	2	1	1	1	1	2	2	2	2	3	1	3	3	3	2	2	2	2	2	1	1	1	2	2	2	2	3	1	1	2	2	2	2	2
9232	2	163	48	19	1	0	3	2	3	2	5	3	1	2	2	1	1	1	1	1	1	2	2	2	2	1	2	2	2	2	2	2	2	2	2	2	2	3	2	2	2	2	2	2	2	2	2	2	2
8548	2	161	45	19	0	0	3	2	3	2	5	2	4	3	2	1	1	1	1	1	2	3	3	3	3	2	3	3	3	3	3	3	2	2	1	2	1	3	3	2	3	3	3	3	3	3	3	3	1
9307	2	160	40	19	1	0	3	2	3	2	5	2	1	2	2	2	2	2	2	2	3	2	2	2	2	2	2	2	2	2	2	2	2	2	2	2	2	2	2	2	2	2	2	2	2	2	2	2	2
9556	2	158	51	19	0	1	3	2	2	2	6	2	4	2	2	2	1	1	1	1	4	3	3	3	3	3	3	3	3	3	3	3	3	2	3	2	1	3	3	2	2	3	2	2	2	3	2	3	3
8265	2	162	98	19	1	0	3	2	2	2	6	1	1	3	1	1	1	1	1	1	1	3	3	3	3	1	3	3	2	2	2	2	2	2	2	2	2	2	2	2	2	2	2	2	2	2	2	2	2
10151	1	183	75	19	0	0	3	2	2	2	6	2	2	1	2	1	1	2	1	1	3	3	3	3	2	2	3	2	2	2	2	2	3	2	2	2	1	2	3	2	2	2	2	2	2	3	2	2	2
10754	1	172	67	19	0	0	3	2	2	2	6	4	3	4	3	3	1	2	2	1	3	2	1	2	2	2	3	2	3	1	3	2	2	2	3	2	2	3	1	1	1	2	1	2	2	2	2	2	2
9424	2	167	55	19	1	0	3	2	2	2	6	3	4	3	2	1	1	2	1	1	3	3	3	3	1	2	2	2	2	3	2	3	3	2	1	2	1	3	2	2	1	2	1	2	3	3	3	3	1
7742	2	156	53	19	0	0	3	2	2	2	6	2	1	1	2	2	2	2	2	1	5	2	2	2	1	1	2	2	2	2	2	2	2	2	1	2	1	2	2	1	2	2	1	2	2	2	2	2	2
7239	1	165	50	19	0	0	3	2	2	2	6	5	3	5	3	5	2	3	1	1	3	2	2	2	2	2	2	2	2	2	2	2	2	2	2	2	2	2	2	2	2	2	2	2	2	2	2	2	2
7627	2	160	49.5	19	1	0	3	2	2	2	6	1	4	3	2	1	1	1	1	1	1	2	2	2	2	2	2	3	3	2	2	2	3	1	1	2	1	3	2	1	2	2	1	2	2	2	2	2	1
8169	2	160	49	19	0	0	3	2	2	2	6	3	1	4	2	5	1	1	3	1	3	2	2	2	2	2	2	2	2	2	2	3	2	2	2	3	1	2	3	1	3	3	1	1	2	2	2	2	2
8540	2	163	52	19	0	0	2	2	3	1	7	2	2	1	2	1	1	1	1	1	3	3	3	3	1	3	3	3	3	1	3	3	1	3	3	3	3	1	3	3	3	3	3	3	3	3	3	3	3
11020	2	168	54	19	0	0	3	3	2	1	6	1	1	1	3	1	1	1	1	1	1	1	1	1	3	2	2	2	2	3	3	3	2	2	2	2	2	2	2	2	2	2	2	2	2	2	2	2	2
7445	2	170	51.5	19	0	0	2	1	4	3	5	4	3	4	2	2	1	1	1	1	3	2	2	2	2	2	2	2	2	2	2	2	2	2	2	2	2	2	2	2	2	2	2	2	2	2	2	2	2
8023	2	162	51	19	1	1	3	2	3	3	4	3	2	4	2	1	1	1	5	1	2	2	3	2	2	2	2	3	2	2	2	2	3	1	1	2	1	3	2	3	1	2	1	1	2	1	1	3	1
7143	1	178	57	19	1	0	3	2	3	3	4	4	1	1	2	1	1	1	1	1	3	3	3	3	1	3	3	3	3	1	3	3	1	3	3	3	3	1	3	3	3	3	3	3	3	3	3	3	3
8102	2	168	60	19	1	1	2	2	4	2	5	3	1	2	2	1	1	1	1	1	1	3	3	3	1	2	2	3	3	2	2	2	2	1	1	2	1	3	3	2	2	2	1	2	2	2	2	2	2
7057	1	160	50	19	0	0	3	3	3	2	4	2	1	2	2	2	2	2	2	1	1	3	3	3	3	2	3	2	2	2	3	3	3	1	3	3	1	1	3	1	1	3	3	3	3	3	3	3	3
5269	1	176	70	19	1	1	2	3	4	1	5	2	1	3	2	3	3	3	3	3	3	2	2	2	2	2	2	2	2	2	2	2	2	2	2	2	2	2	2	2	2	2	2	2	2	2	2	2	2
10989	1	173	75	19	0	0	3	2	1	2	7	4	2	1	3	2	1	1	1	1	3	3	3	3	2	2	3	3	3	3	3	3	2	2	3	3	2	3	3	3	2	1	3	3	3	3	3	3	3
7942	1	175	54	19	1	1	2	2	3	2	6	3	2	3	2	1	1	2	1	1	2	2	3	3	1	1	3	2	2	1	3	3	2	2	1	3	1	2	2	1	2	2	3	2	3	3	2	2	1
7536	2	178	130	19	1	0	2	2	3	2	6	2	2	3	2	1	1	1	1	1	5	2	2	2	2	2	2	2	2	2	2	2	2	2	2	2	2	2	2	2	2	2	1	2	2	2	2	2	2
9998	1	173	56	19	0	0	2	2	3	2	6	4	1	1	2	1	1	1	1	1	1	3	3	3	1	3	3	3	3	2	3	3	3	2	3	3	2	3	3	2	3	3	3	3	3	3	3	3	3
10354	2	165	50	19	0	0	3	3	2	2	5	2	2	2	2	1	1	1	1	1	3	2	2	2	2	1	2	2	2	3	2	2	2	2	2	1	1	3	2	2	2	2	1	2	2	2	2	2	1
7368	1	171	66	19	0	0	2	3	4	2	4	4	4	2	3	5	1	4	1	1	5	3	3	3	1	3	3	3	3	1	3	3	2	3	3	3	3	2	2	2	2	2	2	2	2	2	2	2	2
9393	1	190	90	19	1	1	2	2	2	2	7	2	2	1	3	1	1	1	1	1	1	3	3	3	1	3	3	3	3	1	3	3	3	1	3	3	3	3	2	1	3	3	3	3	3	1	3	3	3
10108	2	162	68	19	0	0	2	2	2	2	7	2	4	3	2	1	1	1	1	1	1	2	2	2	2	2	2	2	2	2	2	2	2	2	2	2	2	2	2	2	2	2	2	2	2	2	2	2	2
8586	2	159	49	19	1	0	2	2	2	2	7	4	2	4	2	1	1	1	1	1	3	2	3	3	2	2	3	3	3	2	3	3	2	2	3	2	1	3	3	1	2	3	2	3	3	3	3	3	2
10437	1	175	60	19	1	1	2	2	3	3	5	4	5	5	2	1	1	1	1	1	1	3	3	3	3	2	2	2	2	3	3	3	1	2	2	2	2	2	2	2	2	2	2	2	2	2	2	2	2
8836	1	178	62	19	1	1	5	2	4	2	1	2	1	2	3	3	3	3	3	2	3	3	3	3	1	3	3	3	3	1	3	3	2	3	3	3	2	3	2	3	3	3	1	3	3	3	3	3	1
10646	1	190	110	19	1	1	4	1	3	1	5	3	2	1	3	1	1	1	1	1	2	3	3	3	2	3	3	3	3	1	3	3	2	3	1	2	1	3	1	3	2	2	1	2	3	2	2	2	2
8959	2	158	75	19	0	0	4	1	3	1	5	2	1	1	2	1	1	1	1	1	1	3	3	3	3	2	2	3	3	3	3	3	3	2	2	1	1	2	2	2	2	3	2	2	3	2	2	3	2
9298	2	167	51	19	0	0	4	1	3	1	5	3	2	4	2	3	2	3	2	1	5	2	3	2	2	1	3	2	3	1	2	2	2	2	2	2	1	2	2	3	3	3	2	2	2	2	3	2	1
11140	2	168	65	19	1	0	4	2	4	1	3	4	3	3	3	2	1	1	1	1	2	3	3	3	1	3	3	3	3	2	2	2	3	2	2	2	2	1	2	3	3	3	1	1	3	2	2	2	2
10881	1	176	72	19	0	1	4	1	2	1	6	3	4	3	4	1	2	3	2	3	1	1	2	3	1	2	2	3	3	3	2	2	1	2	1	3	3	1	2	2	3	1	2	1	1	3	3	2	2
8855	2	155	60	19	0	0	4	1	2	1	6	3	2	3	2	2	1	1	1	1	2	2	1	2	2	1	3	3	3	1	2	2	3	1	1	2	1	3	1	3	3	3	2	1	1	1	2	2	2
9505	2	168	60	19	0	1	3	1	4	1	5	3	3	3	3	1	1	1	1	1	1	3	3	3	3	1	3	3	3	2	2	3	2	2	1	1	1	3	2	2	2	3	1	2	2	3	2	3	3
10454	2	159	55	19	1	1	3	1	4	1	5	2	2	2	2	2	2	2	2	2	5	1	3	3	2	3	3	3	3	2	2	2	2	3	2	2	1	3	2	1	2	2	2	2	2	3	2	2	3
7442	1	183	75	19	0	0	3	1	4	1	5	2	4	1	2	1	1	1	1	1	2	3	3	3	1	2	2	2	2	1	3	3	2	3	1	1	1	2	2	2	2	2	2	2	2	2	2	2	2
8163	2	166	70	19	0	0	3	1	4	1	5	2	2	3	2	3	3	2	1	1	2	2	2	2	2	2	2	2	2	2	2	2	2	2	2	2	2	2	2	2	2	2	2	2	2	2	2	2	3
9107	2	160	49	19	1	0	3	1	4	1	5	2	1	2	2	1	2	2	1	1	1	2	3	3	1	2	2	3	2	2	3	3	3	2	3	2	1	2	2	2	2	2	2	2	2	2	2	2	2
9250	2	163	68	19	1	1	4	2	3	1	4	3	2	3	3	1	1	1	1	1	5	2	3	3	2	2	3	3	3	1	3	3	3	2	2	2	1	2	2	3	2	2	2	3	3	3	2	3	2
7968	1	175	125	19	0	0	4	2	3	1	4	2	2	1	2	3	2	2	1	1	2	2	3	3	1	1	2	3	2	2	2	2	3	2	1	2	1	3	2	2	2	2	1	2	2	3	2	3	1
10026	2	154	40	19	0	0	4	2	3	1	4	3	3	1	3	1	3	2	2	1	1	2	2	2	1	3	3	2	2	2	3	3	3	2	3	3	1	2	2	2	3	3	3	3	3	2	2	2	3
9704	2	156	48	19	1	1	4	1	2	2	5	3	2	1	2	1	1	1	1	1	1	2	2	2	2	2	2	2	2	2	2	2	3	2	2	2	2	3	2	1	2	2	2	2	2	2	2	2	2
8135	1	180	90	19	0	1	3	1	3	1	6	2	2	2	2	1	1	1	1	1	1	3	3	3	1	3	3	3	3	1	3	3	1	3	3	3	3	1	3	3	3	3	3	3	3	3	3	3	3
8065	2	167	73	19	1	1	3	1	3	1	6	3	2	3	3	2	1	3	1	1	2	2	3	2	1	3	2	2	3	2	2	3	2	3	1	3	1	2	2	3	2	3	1	2	2	2	2	3	2
10405	1	172	70	19	1	1	3	1	3	1	6	2	1	1	2	1	1	1	1	1	1	3	3	3	1	3	3	3	3	1	3	3	3	3	3	3	1	3	3	2	3	3	3	3	3	3	3	3	3
9395	1	171	89	19	0	0	3	1	3	1	6	4	4	4	2	3	3	3	3	3	5	2	2	2	2	2	2	2	2	2	2	2	2	2	2	2	2	2	2	2	2	2	2	2	2	2	2	2	2
7080	2	166	63	19	0	0	3	1	3	1	6	2	1	4	2	3	1	2	1	1	2	2	3	3	2	1	3	2	2	2	3	3	2	2	3	2	2	2	3	3	3	2	2	2	2	2	2	2	2
9729	2	165	61.5	19	0	0	3	1	3	1	6	4	3	2	3	4	3	4	3	1	5	2	2	3	1	1	2	2	2	2	2	2	2	2	3	2	2	3	2	2	2	2	1	2	2	2	2	2	1
8446	2	162	60	19	0	0	3	1	3	1	6	3	2	1	2	2	1	1	1	1	2	3	3	3	1	3	3	3	3	3	3	3	3	3	3	3	2	2	3	2	3	3	3	3	3	2	3	3	3
8329	2	165	58	19	0	0	3	1	3	1	6	3	2	3	2	3	4	3	1	1	5	2	2	2	2	2	2	2	2	2	2	2	2	2	2	2	2	2	2	2	2	2	2	2	2	2	2	2	2
7756	2	162	57	19	0	0	3	1	3	1	6	3	1	3	2	2	1	1	1	1	3	2	2	2	2	1	3	2	2	2	2	2	2	1	1	2	1	3	2	2	2	3	2	1	2	3	3	3	2
8581	2	165	55	19	0	0	3	1	3	1	6	2	1	1	2	1	1	1	1	1	5	3	3	3	1	1	1	1	2	1	2	2	2	1	1	1	1	2	2	2	2	2	2	2	2	3	2	2	2
8415	2	155	54	19	0	0	3	1	3	1	6	2	1	2	2	5	5	5	5	3	5	2	2	2	2	2	2	2	2	2	2	2	2	2	2	2	2	2	2	2	2	2	2	2	2	2	2	2	2
9148	2	160.4	49	19	0	0	3	1	3	1	6	3	2	3	2	2	1	1	1	1	1	2	2	2	2	1	2	2	2	3	2	2	3	1	1	1	1	3	1	2	2	3	1	1	2	2	2	2	1
12120	2	158	47	19	0	0	3	1	3	1	6	2	2	2	3	1	1	1	1	1	5	2	2	2	2	2	3	2	2	3	3	3	2	1	1	2	1	3	2	1	2	2	2	2	2	3	3	3	2
8327	2	158	45	19	0	0	3	1	3	1	6	3	2	2	2	1	1	1	2	1	5	2	2	2	2	2	2	2	2	2	2	2	2	2	2	2	2	2	2	2	2	2	2	2	2	2	2	2	2
10314	2	155	65	19	1	0	4	2	2	1	5	1	1	1	2	1	1	1	1	1	1	2	2	2	2	2	2	2	2	2	2	2	2	2	2	2	2	2	2	2	2	2	2	2	2	2	2	2	2
8111	2	167	62	19	0	0	4	2	2	1	5	2	1	2	2	1	2	2	1	1	2	2	2	2	2	1	2	2	2	2	3	2	2	2	1	2	1	2	2	1	2	2	1	2	2	2	2	2	2
7582	1	176	62	19	0	0	3	1	2	1	7	2	1	2	2	1	1	1	1	1	1	3	3	3	1	3	3	3	3	2	2	2	3	3	3	1	1	3	2	3	3	3	2	3	3	2	3	2	2
7065	2	158	48	19	0	0	3	1	2	1	7	1	1	1	2	2	3	1	5	1	3	1	3	3	1	3	3	3	3	3	3	3	2	3	3	3	1	3	3	3	3	3	3	3	3	3	3	3	3
11053	2	167	45	19	0	0	3	1	2	1	7	2	2	3	2	2	2	2	2	2	2	2	2	2	2	2	2	2	2	2	2	2	2	2	2	2	2	2	2	2	2	2	2	2	2	2	2	2	2
7777	1	180	88	19	0	1	4	2	4	3	1	3	2	2	3	4	1	1	1	1	3	2	2	2	2	2	2	2	2	2	2	2	2	2	2	2	2	2	2	2	2	2	1	2	2	2	2	2	2
9685	1	181	65	19	0	0	3	1	3	2	5	2	1	1	1	1	1	1	1	1	1	3	3	3	1	3	3	3	3	1	3	3	1	3	3	3	3	1	3	3	3	3	3	3	3	3	3	3	3
7920	2	175	56	19	0	1	4	2	2	2	4	2	2	3	2	1	1	1	1	1	2	2	2	2	2	2	2	2	2	2	2	2	3	2	2	3	1	3	2	2	2	2	2	1	2	2	2	2	2
6985	1	177	90	19	0	0	4	2	2	2	4	2	4	2	2	1	1	1	1	1	1	2	3	3	1	3	3	3	3	1	3	3	1	2	2	2	2	2	2	2	2	2	2	2	2	2	2	3	3
9000	1	185	72	19	1	1	3	2	3	1	5	3	2	2	3	1	1	1	1	1	1	2	3	3	1	3	3	2	3	2	3	3	2	2	2	2	1	3	3	2	2	3	1	3	3	3	3	3	1
8480	1	176	70	19	1	1	3	2	3	1	5	3	2	3	2	1	1	1	1	1	2	2	2	2	2	2	2	2	2	2	2	2	2	2	2	2	2	2	2	2	2	2	2	2	2	3	2	2	2
9903	2	167	68	19	0	1	3	2	3	1	5	4	3	3	2	3	3	3	5	3	5	2	2	2	2	1	1	1	1	3	2	2	2	2	1	1	1	2	1	1	2	2	2	2	1	1	2	2	2
7400	2	170	65	19	1	1	3	2	3	1	5	1	1	5	1	1	1	1	1	1	5	3	3	3	1	3	3	3	3	1	3	3	3	1	3	3	3	3	3	3	1	3	3	3	3	3	3	3	1
7886	1	170	65	19	0	1	3	2	3	1	5	3	2	2	2	2	2	1	1	1	5	2	2	2	3	2	2	3	3	2	3	2	3	2	2	2	1	3	2	2	2	2	1	2	2	2	2	2	2
7488	2	162	44	19	0	1	3	2	3	1	5	2	1	4	2	1	1	1	1	1	1	2	2	2	2	2	2	2	2	2	2	2	2	2	2	2	2	2	2	2	2	2	2	2	2	2	2	2	2
9511	1	178	73	19	1	0	3	2	3	1	5	2	1	2	2	2	2	2	2	1	5	3	3	3	2	1	3	3	3	1	3	3	3	3	3	3	1	2	1	2	2	2	2	2	2	2	2	2	2
11989	2	165	55	19	0	0	3	2	3	1	5	2	1	3	2	2	2	2	2	2	1	2	2	2	2	2	2	2	2	2	2	2	2	2	2	2	2	2	2	2	2	2	2	2	2	2	2	2	2
8087	2	160	49	19	0	0	3	2	3	1	5	3	2	3	2	2	1	2	1	1	3	3	3	2	2	2	3	2	2	2	3	2	2	2	1	3	2	3	2	1	2	2	1	2	2	3	2	2	2
10800	2	163	64	19	1	1	2	1	3	1	7	2	2	1	2	1	1	1	1	1	1	2	2	2	2	2	2	2	2	2	2	2	2	1	2	2	1	2	2	1	2	2	2	2	2	2	2	2	2
9272	1	175	80	19	0	1	3	2	2	1	6	3	3	4	2	1	2	1	3	1	1	2	2	2	2	3	2	2	2	3	2	2	3	2	2	2	1	2	1	2	2	2	1	2	2	2	2	2	1
9607	1	170	72	19	1	1	3	2	2	1	6	2	4	3	2	1	1	1	1	1	1	3	3	3	1	1	3	3	3	1	3	3	3	1	1	1	1	3	3	3	3	3	3	3	3	3	3	3	3
8156	2	168	60	19	0	0	3	2	2	1	6	3	2	3	2	3	3	3	3	1	3	2	2	2	2	2	2	2	2	2	2	2	3	1	1	1	1	2	3	2	3	3	3	3	3	3	3	3	2
8767	2	159.3	53	19	0	0	3	2	2	1	6	4	3	4	2	2	2	2	2	2	5	2	2	2	2	2	2	2	2	2	2	2	2	2	2	2	2	2	2	2	2	2	2	2	2	2	2	2	2
8749	1	181	75	19	0	1	3	2	3	2	4	3	3	3	3	1	1	1	1	1	3	3	3	3	1	3	3	3	3	3	3	3	3	3	3	1	1	2	3	3	3	3	3	3	3	3	3	3	3
9222	2	160	53	19	0	1	3	2	3	2	4	3	2	3	2	1	1	1	1	1	1	1	2	2	2	1	2	2	2	2	2	2	1	2	2	1	1	2	2	1	1	1	1	1	2	2	2	2	1
7753	1	176	85	19	0	0	3	2	3	2	4	3	3	3	3	1	1	1	1	1	2	3	3	3	1	3	3	3	3	1	3	2	2	3	3	3	3	1	3	3	3	3	3	3	3	3	3	3	3
8553	2	173	57	19	0	0	3	2	3	2	4	2	2	2	2	3	3	3	3	3	2	1	1	2	2	2	2	2	1	2	2	1	3	2	2	1	2	2	2	1	2	1	2	2	2	1	1	1	2
8550	1	175	62	19	0	0	2	1	2	1	8	2	1	2	2	2	2	2	2	2	3	2	2	2	2	2	2	2	2	2	2	2	2	2	2	2	2	2	2	2	2	2	2	2	2	2	2	2	2
10017	2	176	58.5	19	0	0	2	1	3	2	6	3	3	4	3	1	1	1	1	1	5	1	1	1	2	2	2	2	3	3	2	2	3	1	1	1	1	2	3	2	1	1	1	1	1	2	2	2	2
10517	1	184	71	19	0	1	3	2	2	2	5	3	3	2	2	3	2	2	1	1	3	1	1	1	3	3	2	2	3	1	3	1	1	3	2	2	3	1	3	3	3	3	2	3	3	3	3	3	3
9881	1	173	62	19	0	1	3	2	2	2	5	4	4	3	2	5	2	5	1	1	3	1	2	2	3	1	3	2	3	2	3	2	2	2	1	2	1	3	2	2	2	2	1	1	2	3	2	2	2
9565	2	158	47	19	0	1	3	2	2	2	5	2	1	2	2	1	1	1	1	1	1	2	2	2	2	2	2	2	2	2	2	2	2	2	2	2	2	2	2	2	2	2	2	2	2	2	2	2	2
10047	2	158	42	19	0	0	3	2	2	2	5	3	4	3	2	2	1	1	1	1	5	2	2	2	2	3	2	2	2	3	2	2	3	2	1	2	1	2	2	1	2	2	2	2	2	3	2	2	1
7787	1	176	54	19	0	0	2	2	3	1	6	1	2	5	3	5	1	2	4	1	5	3	3	3	2	1	3	1	3	1	3	3	3	3	3	3	3	1	3	3	3	3	3	3	3	3	3	3	1
10084	2	160	46.5	19	1	0	2	2	3	1	6	3	3	5	3	3	1	2	5	2	5	3	3	3	2	1	2	2	3	2	3	3	2	2	1	2	1	2	3	3	1	3	1	3	3	3	3	3	2
11026	2	156	44	19	0	0	2	2	2	1	7	2	1	2	2	1	1	2	1	1	2	2	2	2	1	3	3	2	3	2	2	2	2	2	1	3	1	3	2	1	2	3	1	2	2	3	2	3	2
7397	2	160	67	19	0	1	2	1	3	3	5	4	4	2	3	4	4	5	5	1	5	2	3	2	2	1	2	2	2	2	3	2	3	2	1	1	1	3	2	2	2	2	1	2	2	2	3	2	2
8478	2	167	120	19	1	1	2	2	3	2	5	2	1	3	2	1	1	1	1	1	1	1	3	3	1	2	3	3	3	1	3	2	1	3	1	1	1	3	3	3	3	3	3	3	2	3	2	3	3
8769	1	173	60	19	1	1	2	2	3	2	5	2	1	1	2	1	1	1	1	1	1	2	2	2	2	2	2	3	3	3	3	3	2	2	2	1	1	3	1	1	2	2	1	1	3	2	2	2	2
9290	1	172	59	19	0	1	2	2	3	2	5	2	1	3	2	1	1	1	1	1	5	3	3	3	2	2	2	2	2	2	3	3	3	2	2	3	1	3	1	1	2	2	1	2	2	3	3	3	3
9015	2	158	46	19	1	1	2	2	3	2	5	2	1	1	2	1	1	4	1	1	1	3	3	3	3	3	3	3	3	3	3	3	3	1	3	1	1	2	3	3	3	3	3	3	3	3	3	3	2
10306	2	160	50	19	0	1	2	2	2	2	6	3	3	2	3	1	1	1	1	1	2	3	3	3	1	3	3	3	3	3	3	3	3	1	1	1	1	3	2	1	2	3	1	2	2	2	3	3	3
9762	1	170	55	19	0	0	2	2	2	2	6	2	1	2	2	2	2	1	1	1	2	3	3	3	2	1	3	3	2	2	3	3	3	2	3	2	1	3	2	3	3	3	2	2	3	2	3	3	3
8935	1	178	78	19	0	0	2	3	2	2	5	2	1	3	3	1	1	1	1	1	2	3	3	3	1	3	3	3	3	1	3	3	2	3	3	3	2	3	3	1	1	3	1	3	3	2	2	2	2
7310	2	168	52	19	0	0	5	1	4	1	2	1	1	2	2	3	2	3	1	1	1	2	2	2	2	2	2	2	2	2	2	2	3	1	1	1	1	3	2	1	2	3	1	1	1	1	1	1	1
4901	2	167	45	19	0	1	4	2	5	1	1	3	3	3	2	3	2	2	3	2	3	2	1	2	3	1	2	2	1	3	2	2	2	1	2	2	1	3	2	1	1	2	1	2	1	2	2	1	2
9597	2	169.99	58	19	1	0	5	1	2	2	3	3	2	1	2	1	1	1	1	1	1	3	2	2	1	1	1	2	2	2	2	2	3	2	2	2	1	3	2	3	2	3	1	2	2	2	2	2	1
10156	2	165	70	19	0	0	4	1	3	1	4	2	2	1	2	1	1	1	1	1	2	2	3	3	2	3	3	3	3	3	3	3	2	1	1	1	1	2	3	1	2	3	3	2	3	2	3	3	2
9221	1	167	66	19	0	0	4	1	3	1	4	5	1	3	3	5	5	5	5	5	3	3	3	3	1	3	3	3	3	1	3	3	1	3	3	3	3	1	3	3	3	3	3	3	3	3	3	3	3
10261	2	165	82	19	0	1	3	1	5	1	3	3	4	2	3	2	2	1	1	1	5	3	3	3	2	2	3	3	3	2	3	3	2	3	3	3	2	2	2	2	2	3	3	3	2	2	2	2	1
6896	1	170	56	19	0	0	4	1	2	1	5	2	4	1	2	1	1	1	1	1	2	2	2	2	2	2	2	2	2	1	3	3	3	2	2	2	2	2	2	2	2	2	2	2	2	2	2	2	2
9169	2	160	46	19	0	0	4	1	2	1	5	4	1	2	2	4	2	2	2	1	3	2	2	2	2	2	2	2	2	2	2	2	2	2	2	2	2	2	2	2	2	2	2	2	2	2	2	2	2
10311	1	178.6	90	19	0	1	3	1	4	1	4	2	2	2	2	2	2	1	1	1	2	2	3	3	1	3	3	3	3	2	3	3	3	2	2	2	1	3	2	3	2	2	2	2	2	2	2	2	2
7500	2	176	63	19	1	1	3	1	4	1	4	2	1	2	3	2	2	2	2	2	5	2	2	2	2	2	2	2	2	2	2	2	2	2	2	2	2	2	2	2	2	2	2	2	2	2	2	2	2
9965	1	185	60	19	0	0	3	1	4	1	4	3	3	3	3	3	3	3	3	3	2	2	2	2	2	2	2	2	2	2	2	2	2	2	2	2	2	2	2	2	2	2	2	2	2	2	2	2	2
4992	1	170	76	19	0	1	4	2	3	1	3	1	1	4	3	1	1	1	1	1	1	3	3	3	1	3	3	3	3	1	3	3	1	3	3	3	3	1	3	3	3	3	3	3	3	3	3	3	3
7441	2	169	55	19	1	1	4	2	4	2	1	4	2	1	2	3	3	3	3	3	3	2	2	2	2	2	2	2	2	2	2	2	2	2	2	2	2	2	2	2	2	2	2	2	2	2	2	2	2
6939	1	175	72	19	0	1	3	1	3	1	5	2	1	1	2	1	1	1	1	1	1	3	3	3	1	3	3	3	3	3	3	3	3	2	3	1	1	3	2	3	3	3	3	3	3	3	3	3	3
11103	2	168	52	19	1	1	3	1	3	1	5	3	3	3	2	2	3	2	1	1	4	2	2	2	2	2	2	2	2	2	2	2	2	2	2	2	2	2	2	2	2	2	2	2	2	2	2	2	2
9163	2	158	96	19	0	0	3	1	3	1	5	3	3	3	2	1	1	1	1	1	2	2	3	2	3	1	3	2	2	2	2	2	3	2	3	3	1	2	2	1	3	3	2	2	3	3	3	3	2
7769	2	168	73	19	0	0	3	1	3	1	5	3	2	2	2	2	3	2	2	1	3	2	2	2	2	2	2	3	3	2	2	3	3	2	2	2	1	2	2	2	2	3	2	3	3	2	2	2	2
7120	1	174	70	19	0	0	3	1	3	1	5	2	2	3	2	3	2	5	5	1	2	3	2	3	3	1	3	2	1	1	2	3	2	3	1	3	1	2	2	3	3	3	1	1	2	3	2	3	3
7971	1	185	65	19	0	0	3	1	3	1	5	3	2	1	2	1	1	1	1	1	3	2	2	2	2	2	2	2	2	2	2	2	2	2	2	2	2	2	2	2	2	2	2	2	2	2	2	2	2
8442	2	172	65	19	0	0	3	1	3	1	5	3	2	2	3	1	2	1	2	2	4	1	2	2	1	1	3	2	3	1	2	3	3	3	3	2	1	3	3	3	3	3	1	3	3	3	1	3	1
10558	1	172	65	19	0	0	3	1	3	1	5	3	2	2	2	1	1	1	1	1	1	2	2	3	2	2	3	3	3	3	3	3	3	2	2	2	1	3	2	2	2	3	2	3	3	2	2	2	2
8216	1	173	63.5	19	1	0	3	1	3	1	5	2	2	2	3	3	3	3	3	3	1	1	1	1	3	1	1	1	1	2	2	2	3	2	2	1	1	2	2	2	2	2	2	2	2	2	2	2	2
8218	1	170	63	19	0	0	3	1	3	1	5	3	3	4	3	4	2	3	2	1	2	3	3	3	2	2	3	3	3	2	3	3	2	2	3	3	1	2	3	2	2	2	1	3	3	3	3	3	2
10196	1	180	60	19	0	0	3	1	3	1	5	5	5	1	1	5	4	2	4	2	3	3	3	3	1	3	3	3	3	1	2	2	2	2	2	2	2	2	2	2	2	2	2	2	2	2	2	2	2
11173	2	170	60	19	0	0	3	1	3	1	5	5	5	5	3	5	5	5	5	1	5	2	2	2	2	2	2	2	2	2	2	2	3	2	2	2	2	3	2	2	2	3	2	2	2	2	2	2	2
7237	2	167	60	19	1	0	3	1	3	1	5	2	2	2	3	1	1	1	1	1	1	2	2	3	1	3	3	3	3	2	3	3	3	2	2	2	1	2	2	2	2	2	2	2	2	2	2	2	2
9179	1	169	59	19	0	0	3	1	3	1	5	3	2	1	2	2	2	1	2	1	3	2	3	3	2	2	3	3	3	2	3	3	2	2	2	2	1	2	2	3	2	2	1	2	3	2	2	3	2
8916	2	158	59	19	0	0	3	1	3	1	5	5	3	4	3	2	3	4	2	1	1	3	3	3	1	3	3	3	3	1	3	3	2	3	3	3	3	1	3	3	3	3	3	3	3	3	3	3	3
8187	2	168	55	19	0	0	3	1	3	1	5	2	2	2	2	1	1	1	1	1	5	1	2	2	2	1	1	1	1	3	3	3	3	3	3	2	1	3	1	2	2	2	1	1	1	1	2	2	2
7997	2	166	55	19	0	0	3	1	3	1	5	2	2	3	2	1	1	2	1	1	3	2	2	2	2	2	2	2	2	2	2	2	2	2	2	2	2	2	2	2	2	2	2	2	2	2	2	2	2
11190	2	165	55	19	0	0	3	1	3	1	5	2	2	3	2	1	1	1	1	1	2	2	2	2	2	2	2	2	3	1	3	3	3	1	2	2	1	2	2	2	2	2	2	3	3	3	2	2	1
7425	2	167	54	19	0	0	3	1	3	1	5	3	2	3	2	1	2	1	1	1	3	2	2	2	2	2	2	2	2	2	3	3	3	3	2	2	2	2	2	2	2	2	1	3	3	2	2	2	2
7316	2	158	53	19	0	0	3	1	3	1	5	4	4	3	3	2	1	2	2	1	3	2	2	2	3	1	2	2	3	2	2	3	3	1	1	1	1	3	2	1	2	3	1	1	2	2	2	2	1
10995	2	164	52	19	0	0	3	1	3	1	5	1	1	4	2	2	2	1	1	1	2	3	3	3	2	2	3	2	2	2	3	3	3	2	1	2	1	2	3	2	2	2	2	1	3	2	2	2	2
7755	2	168	51	19	1	0	3	1	3	1	5	3	1	1	3	1	1	2	1	1	1	2	1	3	1	1	3	3	2	2	3	2	1	3	3	3	1	2	2	2	3	3	2	2	3	1	2	3	1
9032	2	170	50	19	0	0	3	1	3	1	5	2	1	1	2	1	1	1	1	1	1	3	3	3	3	3	3	3	3	2	3	3	3	2	2	1	1	2	2	1	3	3	3	2	3	3	3	3	2
8006	2	162	50	19	1	0	3	1	3	1	5	2	3	3	3	3	2	3	1	1	3	3	2	3	2	2	2	2	2	2	2	2	3	2	2	2	2	3	2	2	2	1	2	2	2	2	2	2	1
7101	2	160	48	19	0	0	3	1	3	1	5	4	4	5	2	2	1	3	1	1	2	2	3	3	2	3	3	2	2	1	3	3	2	2	2	2	1	3	1	2	2	2	1	2	2	3	2	2	2
8151	2	154	48	19	0	0	3	1	3	1	5	3	3	2	2	1	1	1	1	1	1	2	2	2	2	2	2	2	2	2	2	2	2	2	2	2	2	2	2	2	2	2	2	2	2	2	2	2	2
10000	2	160	49	19	0	1	4	2	2	1	4	3	1	2	2	2	1	3	3	1	5	2	2	3	2	2	3	3	3	2	2	2	3	2	2	3	2	3	2	2	2	3	3	3	3	3	2	2	2
9852	1	170	55	19	0	1	3	1	2	1	6	4	3	4	3	5	5	5	3	1	3	3	2	2	3	1	3	1	1	3	1	1	2	3	1	3	3	2	2	2	3	2	2	2	3	3	1	2	1
10921	2	163	54	19	0	0	3	1	2	1	6	2	1	1	2	1	1	1	1	1	1	2	2	2	2	1	2	2	2	2	2	2	3	2	2	2	1	2	2	2	2	3	1	2	3	2	2	2	2
7476	2	161.8	51	19	0	0	3	1	2	1	6	3	2	3	2	2	1	1	1	1	3	3	3	3	2	1	2	3	3	3	3	3	2	1	1	1	1	2	3	1	2	3	2	3	3	3	3	3	2
11017	1	168	50	19	0	0	3	1	3	2	4	2	2	2	2	1	1	1	1	1	2	2	2	2	2	2	2	2	2	2	2	2	2	2	2	2	2	2	2	2	2	2	2	2	2	2	2	2	2
8561	2	168	57	19	0	1	2	1	4	1	5	2	1	2	2	1	1	1	1	1	1	2	2	2	2	2	2	2	2	2	2	2	2	2	2	2	2	2	2	2	2	2	2	2	2	2	2	2	2
7924	2	167	57	19	0	1	2	1	4	1	5	2	4	1	3	2	1	3	2	1	3	2	2	2	2	2	2	2	2	3	3	2	3	2	1	2	1	3	2	2	2	2	2	2	2	2	2	2	1
[truncated: 2,259 more rows]
[truncated: 46 more columns]
